1  
2  
3  
4  
5  
6  
7  
8  
9  
10  
11  
12  
13  
14  
15  
16  
17  
18  
19  
20

# Comparison Between Lotka-Volterra and Multivariate Autoregressive Models of Ecological Interaction Systems

**Daniel V. Olivença\*, Jacob D. Davis, Eberhard O. Voit**

The Wallace H. Coulter Department of Biomedical Engineering, Georgia Institute of Technology and  
Emory University, 950 Atlantic Drive, Atlanta, Georgia, 30332-2000, USA

\* Corresponding Author; [orcid.org/0000-0001-5474-2657](https://orcid.org/0000-0001-5474-2657)

Contact Information:

Tel: +1 (404) 731-1736

Email: [dvolivenca3@gatech.edu](mailto:dvolivenca3@gatech.edu), [jddavis@gatech.edu](mailto:jddavis@gatech.edu), [eberhard.voit@bme.gatech.edu](mailto:eberhard.voit@bme.gatech.edu)

Running Headline:

Comparison of Lotka-Volterra and MAR models

21 **Abstract:**

22 1. Lotka-Volterra (LV) and Multivariate Autoregressive (MAR) models are computational frameworks with  
23 different mathematical structures that have both been proposed for the same purpose of extracting  
24 governing features of dynamic interactions among coexisting populations of different species from  
25 observed time series data.

26 2. We systematically compare the feasibility of the two modeling approaches, using four synthetically  
27 generated datasets and seven ecological datasets from the literature.

28 3. The overarching result is that LV models outperform MAR models in most cases and are generally  
29 superior for representing cases where the dependent variables deviate greatly from their steady states. A  
30 large dynamic range is particularly prevalent when the populations are highly abundant, change  
31 considerably over time, and exhibit a large signal-to-noise ratio. By contrast, MAR models are better suited  
32 for analyses of populations with low abundances and for investigations where the quantification of noise  
33 is important.

34 4. We conclude that the choice of either one or the other modeling framework should be guided by the  
35 specific goals of the analysis and the dynamic features of the data.

36

37 **Key words:**

38 Algebraic Lotka-Volterra Inference (ALVI), Lotka-Volterra models, Multivariate Autoregressive (MAR)  
39 models, community dynamics, parameter estimation, population dynamics, structure inference, systems  
40 biology.

41

42 **Availability of algorithms used:**

43 <https://github.com/LBSA-VoitLab/Comparison-Between-LV-and-MAR-Models-of-Ecological-Interaction->

44 Systems

## 45 1. Introduction

46 The growth of populations has been a topic of human interest since prehistoric times: Babylonian clay  
47 tablets documented exponential growth in cuneiform lettering as early as about 4,000 years ago (Sachs &  
48 Goetze, 1945; Savageau, 1979). The quantitative representation and analysis of population dynamics is  
49 also one of the early roots of mathematical modeling in biology. In the mid-1920s, Alfred Lotka (Lotka,  
50 1925) studied periodic increases and decreases in the populations of lynx and hare in Canada, while Vito  
51 Volterra (Volterra, 1926) independently analyzed fish catches and the competition among populations in  
52 the Adriatic Sea. Since these early days, Lotka-Volterra (LV) models have become a mainstay—and typical  
53 default—in computational ecology (May, 2001) .

54 With the discovery of complex microbiomes and their surprisingly strong effects on human health and the  
55 environment, the interest in interactions among different species has received renewed attention (Gavin,  
56 Pokrovskii, Prentice, & Sobolev, 2006; Stein et al., 2013; Shenhav et al., 2019). As an example, we recently  
57 inferred the temporally changing interactions among bacterial communities in different lake  
58 environments with over 12,000 Operational Taxonomic Units (OTUs) (Dam et al., 2016; Dam et al., 2020).  
59 We chose as our computational framework an LV model, which we augmented with LV equations for  
60 environmental variables that affected the OTUs (see also (Stein et al., 2013)). Our rationale for this choice  
61 was a combination of (1) the successful history of LV models, (2) their mathematical simplicity and  
62 tractability and (3) the important fact that parameter values (and thus signs and strengths of interactions)  
63 can be obtained from time series data of OTU abundances with methods of linear regression (Voit & Chou,  
64 2010).

65 Multivariate Autoregressive (MAR) models were proposed a few decades ago as a viable alternative to LV  
66 models. Originally proposed for problems in economics (Sims, 1980), Ives suggested their use for  
67 predicting responses of populations to environmental changes (Ives, 1995). His specific motivation was

68 to establish techniques for studying how population abundances change in response to long-term  
69 environmental trends and for partitioning different factors driving changes in mean population densities  
70 in response to these trends. Since this early work, MAR models have been chosen to represent the  
71 interaction dynamics between biotic and abiotic drivers, infer the intra- and interspecific effects of species  
72 abundances on population growth rates, identify environmental drivers of community dynamics, predict  
73 the fate of communities submitted to environmental changes and extract measures of community  
74 stability and resilience. The latter was initially applied to lake and marine systems and later in terrestrial  
75 ecology (Certain, Barraquand, & Gårdmark, 2018).

76 Thus, two modeling frameworks with entirely different structures have been proposed for essentially the  
77 same purpose of extracting key features of dynamic interactions among coexisting populations of  
78 different species from observed time series data. Both methods have had successes, but a direct  
79 comparison of the two approaches has not been reported. Such a comparison is the subject of this article.

80 LV are ODE models, whereas MAR are statistical models. The former were designed to elucidate the long-  
81 term dynamics of interacting populations, whereas the latter were conceived to also describe the  
82 stochastic structure of a dataset. Our focus for their comparison is the ability of each model structure to  
83 produce an acceptable fit to the available data and to capture the process dynamics underlying the  
84 observed trends in population abundances.

85 We use four versions of MAR: MAR without any data transformation, MAR with log transformation, MAR  
86 upon data smoothing and MAR with log transformation upon data smoothing. Log transformation is  
87 necessary for comparing the general mathematical interpretation of a MAR model with a typical ecological  
88 interpretation, where they can be viewed as multispecies competition models with Gompertz density  
89 dependence (Ives, 1995; Certain et al., 2018) (Section 1.3 of the *Supplements*). Data smoothing is explored  
90 to assess if the advantages of LV models are in fact due to this preparatory step. It is clear that data

91 smoothing will impede the ability of MARs to describe stochastic structures in the data, but this aspect is  
92 not the focus of this study.

93 We begin with a description and comparison of the main features of LV models and MAR models,  
94 subsequently analyze small synthetic systems, which offer the advantage of simplicity and full knowledge  
95 of all model features, and then assess several real-world systems. It is quite evident that it is impossible  
96 to compare distinct mathematical approaches with absolute objectivity and without bias (Rykiel, 1996),  
97 and it sometimes happens that inferior choices of models in specific cases outperform otherwise superior  
98 choices. We will attempt to counteract these vagaries by selecting case studies we consider representative  
99 and by stating positive and negative facts and features as objectively as possible.

100

## 101 **2. Materials and Methods**

### 102 **2.1. Lotka-Volterra models**

103 Lotka-Volterra (LV) models (Lotka, 1925; Volterra, 1926) are systems of first-order ordinary differential  
104 equations (ODEs) of the format

$$105 \quad \frac{dX_{i,t}}{dt} = a_i X_{i,t} + \sum_{j=1}^n b_{ij} X_{i,t} X_{j,t}, \quad i = 1, 2, \dots, n. \quad \text{eqn 1}$$

106 The left side of equation 1 represents the change in species  $X_i$  with respect to time. The equation with  
107 only the first term on the right side,  $a_i X_{i,t}$ , yields exponential growth, while the sum captures interactions  
108 between pairs of populations. Most of these terms represent interactions between different species, such  
109 as predation, competition for the same resources or cooperation, but one term in each equation,  $b_{ii} X_{i,t} X_{i,t}$   
110 , accounts for interactions among the members of the same species and is sometimes interpreted as  
111 “crowding effect.” Background and further details regarding these models are presented in *Supplements*

112 Section 1.1. Because ODEs are natural representations of dynamic processes, the index  $t$  is usually  
113 omitted.

114

## 115 **2.2. Estimation of LV Parameters Based on Slopes of Time Courses**

116 Any of the numerous generic parameter estimation approaches for systems of nonlinear ODEs may be  
117 used to estimate the parameter values of LV systems; reviews include (Mendes & Kell, 1998; Wedelin &  
118 Gennemark, 2007; Chou & Voit, 2009). Here, we use a combination of smoothing, slope estimation, and  
119 parameter inference, for which we use the recently introduced Algebraic Lotka-Volterra Inference (ALVI)  
120 method (Voit *et al.*, 2021). We begin by smoothing the raw time series data in order to reduce noise in  
121 the data as well as in their slopes, where the effects of noise are known to be exacerbated (Knowles & Renka,  
122 2014). Many options are available, but smoothing splines and local regression methods are particularly  
123 useful (Cleveland, 1981); they are reviewed in *Supplements* Section 1.2.1. Splines have degrees of freedom  
124 and we will refer to a spline with, say, 8 degrees of freedom as “8DF-spline”.

125 The estimation of slopes allows us to convert the inference problem from one involving ODEs into one  
126 exclusively using algebraic functions. This conversion is accomplished by substituting the left side of  
127 equation 1 with estimated slopes that correspond to values of the dependent variables on the right side,  
128 which leaves the parameters as the only unknowns (Voit & Savageau, 1982; Varah, 1982; Voit & Almeida,  
129 2004; see also *Supplements* Sections 1.2.2. and 1.2.3.).

130 After the differentials are replaced with estimated slopes, two options permit the inference of the  
131 parameter values of LV-models. We can apply simple multivariate linear regression (ALVI-LR), where we  
132 either use all datapoints or iterate the regression several times with subsets of points, which is a natural  
133 approach of creating ensembles of solutions. As an alternative, if  $n$  is the number of variables, one may

134 use  $n+1$  of the datapoints and slopes, which results in a system of linear equations that can be solved with  
135 simple algebraic matrix inversion (ALVI-MI). For a thorough description of the ALVI method please see  
136 (Voit et. al., 2021) and an example in *Supplements* Section 1.2.4.

137

### 138 **2.3. Multivariate Autoregressive (MAR) models**

139 In contrast to the ODEs of the LV format, Multivariate Autoregressive (MAR) models are discrete recursive  
140 linear models. They have the general format

$$141 \quad X_{i,t+1} = \alpha_i + \sum_{j=1}^n \beta_{ij} X_{j,t} + \sum_{g=1}^m \gamma_{ig} u_{g,t} + w_{i,t}; i = 1, 2, \dots, n; w_{i,t} \sim N(0, \delta_i) \quad , \quad \text{eqn 2}$$

142 where  $u_{g,t}$  are environmental variables and  $w_{i,t}$  represents normally distributed noise. This set of  
143 equations, for different  $i$ , is usual represented in the matrix form

$$144 \quad \mathbf{X}_{t+1} = \boldsymbol{\alpha} + \boldsymbol{\beta} \mathbf{X}_t + \boldsymbol{\gamma} \mathbf{u}_t + \mathbf{w}_t, \quad \mathbf{w}_t \sim MVN(0, \boldsymbol{\delta}). \quad \text{eqn 3}$$

145 Explained in words, the “state” of the system at time  $t+1$ , expressed by the vector  $\mathbf{X}_{t+1}$ , depends  
146 exclusively on the state of system one time unit earlier,  $\mathbf{X}_t$ , as well as on external inputs and stochastic  
147 environmental effects. Furthermore,  $\boldsymbol{\alpha}$  is the vector of intercepts and  $\boldsymbol{\beta}$  is one row of the population  
148 interaction matrix. The term  $\boldsymbol{\gamma} \mathbf{u}_t$  describes how cofactors affect the dependent variables. Specifically,  $\mathbf{u}_t$   
149 is a vector of external variables and  $\boldsymbol{\gamma}$  is the vector of weights associated with these external variables.  
150 Finally, the term  $\mathbf{w}_t$  is a vector representing stochastic noise affecting the dependent variables.  
151 Background and further details regarding these models are presented in *Supplements* Section 1.3.

152

### 153 **2.4. Parameter estimation for MAR**



154 Software packages for the estimation of MAR model parameters greatly facilitate the use of these models.  
155 An example is the package MARSS, which uses an expectation maximization algorithm (Holmes, Ward, &  
156 Wills, 2012; Holmes, Ward, & Scheuerell, 2020). Some details of MARSS are discussed in in *Supplements*  
157 Section 1.4. and in the next section.

158

## 159 **2.5. Structural Similarities between Modeling Formats**

160 Although LV and MAR models have both been proposed for characterizing the interactions among  
161 populations within a mixed community, they are distinctly different in structure and appearance.  
162 Nonetheless, they also exhibit fundamental mathematical similarities, which are sketched below; a  
163 detailed analysis is presented in *Supplements* Section 1.5.

164 To assess these similarities, we focus on models without environmental factors, and thus on

$$165 \quad X_{i,t+1} = \alpha_i + \sum_{j=1}^n \beta_{ij} X_{j,t} + w_{i,t}; \quad i = 1, 2, \dots, n; \quad w_{i,n} \sim N(0, \delta_i). \quad \text{eqn 4}$$

166 We also suppose that the MAR variables represent the logarithms of abundances, as proposed in  
167 (Dennis & Taper, 1994; Ives, 1995; Certain *et al.*, 2018). Borrowing the principles of solving ODEs with  
168 Euler's method, we discretize the LV model, which yields

$$169 \quad X_{i,t+h} = X_{i,t} + h \cdot \frac{dX_i}{dt} \Big|_{X_i=X_{i,t}} = X_{i,t} + h \cdot X_{i,t} (a_i + \sum_{j=1}^n b_{ij} X_{j,t}), \quad i = 1, 2, \dots, n. \quad \text{eqn 5}$$

170 If the dynamics remains close to the steady state, then  $X_{i,t+1} - X_{i,t} \approx 0$  for any given  $t$ . Substituting this  
171 approximation into equations 4 and 5 yields

$$172 \quad \alpha_i + \sum_{j=1}^n \beta_{ij} X_{j,t} + w_{i,t} - X_{i,t} \approx 0 \quad \text{eqn 6}$$

173 and

174 
$$a_i + \sum_{j=1}^n \tilde{b}_{ij} X_{j,t} - X_{i,t} \approx 0, \quad \text{eqn 7}$$

175 respectively. Ignoring the noise term in the MAR model, the two sets of near-steady-state equations 6 and 7 are  
176 the same if  $\alpha_i = a_i$ ,  $\beta_{ij} = b_{ij}$  for all  $i \neq j$  and  $\beta_{ij} = b_{ij} + 1$  for  $i = j$ . Thus, the MAR and LV models are mathematically  
177 equivalent at the steady state and similar close to it.

178

### 179 **3. Results**

180 The comparison between LV and MAR models may be executed in two ways. A purely mathematical  
181 approach was sketched in Section 2.5. An alternative approach focuses on practical considerations and  
182 actual results of inferences from data. It is described in the following.

183 For simplicity, we omit environmental inputs ( $c_i X_i U_t$  and  $\gamma_i u_t$ , respectively) and begin by testing several  
184 synthetic datasets with different dynamics. We suppose that these data are moderately sparse and noisy,  
185 to mimic reality. In particular, we test whether the LV inference from synthetic LV data returns the correct  
186 interaction parameters and whether the MAR inference from synthetic MAR data does the same.  
187 Subsequently, we test to what degree LV inferences from MAR data yield reasonable results and *vice*  
188 *versa*. Finally, we apply the inference methods to real data. As the main metric, we compare the sums of  
189 squared errors and use a Wilcoxon rank test to assess the significance of the difference.

190

#### 191 **3.1. Case study 1: Synthetic LV data**

192 The first case consists of data that were generated with a four-variable LV model and superimposed with  
193 synthetic, normally distributed noise (for details, see *Supplements* Section 2). We also generate a smaller

194 noisy dataset, which however comes with replicates. The specific question we address is whether the LV  
195 and MAR inference methods return the true dynamics and parameter values.

196 The fits for the noisy and replicate LV datasets are presented in Figures 1 a, b, along with parameter  
197 estimates. These generally possess the correct sign and could, if deemed beneficial, serve as the starting  
198 point for an additional, refining optimization, for instance with a steepest-descent method. The inferred  
199 and true values are quite similar for the replicate dataset. By contrast, the parameter values inferred for  
200 the noisy dataset do not exactly recoup the true values. In fact, these inferences yield slightly better fits  
201 to the noisy data (SSE=17.981) than the “true” values (SSE=18.197), due to the noise. Because we usually  
202 obtain better results through ALVI-MI, we display those results here and ALVI-LR results in the  
203 *Supplements*.

204 Figure 1 also displays the MARSS estimates with and without log-transformation of the data and with or  
205 without data smoothing. With respect to  $X_1$ ,  $X_2$  and  $X_3$ , these estimates are of adequate quality. They  
206 present good fits, although not as good as the LV inference, which is probably not surprising as the data  
207 were generated with an LV system. MARSS did not perform well for the “detached” variable  $X_4$ , especially  
208 for the noisy dataset.

209

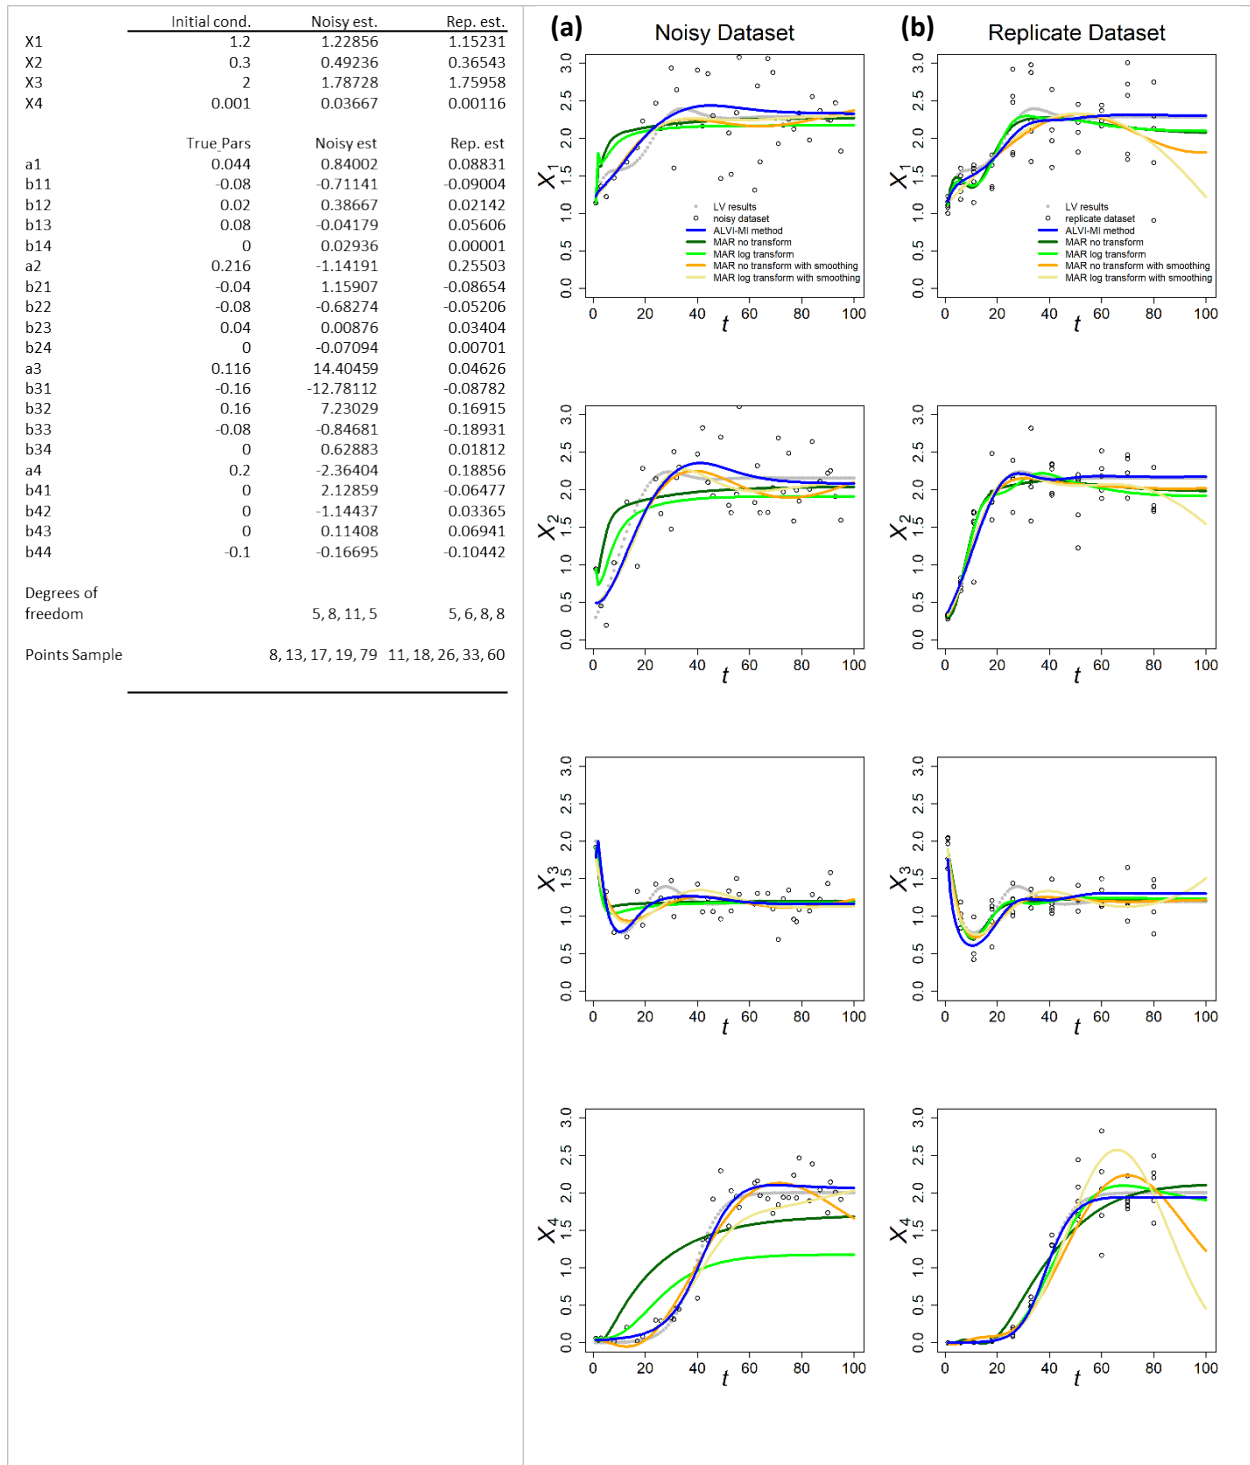

210 **Figure 1: ALVI-MI and MARSS methods applied to noisy (a) and replicate (b) LV datasets.** Original synthetic data  
 211 are shown as gray dots and data with added noise as black circles. ALVI results are presented in blue. True  
 212 parameters and ALVI-MI estimates are presented in the Table. MAR estimates are presented in green, orange  
 213 and yellow. Data and parameter estimates for MAR can be seen in Table S1. SSEs for all fits are presented in Table  
 214 1 toward the end of the article.

215

216 Because MARSS yields parameter values for a discrete recursive system, they are not directly comparable  
217 to the true parameters of a LV system; nonetheless, their numerical values are recorded for completeness  
218 in Tables S1.4 and S1.5.

219 For MARSS inferences from the replicate dataset we had to average points with the same time value.  
220 MARSS did not converge for all parameters but it still presented a relatively good fit. Additional details  
221 are presented in *Supplements* Section 2.

222 The ALVI-MI method also works well for more complicated dynamics, as demonstrated in *Supplements*  
223 Section 2 and Figure S5.

224

### 225 **3.2. Case study 2: Synthetic MAR data**

226 Here we reverse the set-up of Case Study 1 by creating synthetic data with an MAR model and test  
227 whether either method can infer results corresponding to the original system.

228 As a representative example, we use a four-variable MAR system to create 31 synthetic datapoints. We  
229 create a *noisy MAR* dataset by adding noise in the form of a random normal variable of mean zero and a  
230 standard deviation of 20% of each variable's mean to the original 31 points sample. We also create a  
231 *replicate MAR* dataset by choosing 12 points and generating 5 replicates by multiplying their values by a  
232 random normal of mean 1 and standard deviation of 0.2. The initial conditions, parameters, dynamics,  
233 ALVI and MAR fits are presented in Figure 2. All fits to the synthetic MAR data are satisfactory. The LV  
234 parameters are not directly comparable to the MAR parameters.

Noisy MAR

| Pars         | True Values | MAR     | MAR log transform | MAR with data smoothing | MAR log transform with smoothing |
|--------------|-------------|---------|-------------------|-------------------------|----------------------------------|
| $\beta_{11}$ | 0.45        | 0.1326  | 0.31343           | 0.39642                 | 0.3582                           |
| $\beta_{21}$ | -0.5        | -0.7579 | -0.71839          | -0.56989                | -0.72816                         |
| $\beta_{31}$ | -0.2        | -0.3014 | -2.56121          | -0.04234                | -1.47731                         |
| $\beta_{41}$ | 0.3         | 0.0655  | 0.41855           | 0.32471                 | 0.3857                           |
| $\beta_{12}$ | 0.5         | 0.4134  | 0.21377           | 0.39737                 | 0.29638                          |
| $\beta_{22}$ | 0.544635    | 0.0613  | 0.97497           | 0.3656                  | 1.35461                          |
| $\beta_{32}$ | -0.3        | -0.2501 | 2.01907           | -0.2907                 | 1.40072                          |
| $\beta_{42}$ | -0.1        | -0.0694 | -0.75818          | -0.14531                | -0.59619                         |
| $\beta_{13}$ | -0.1        | -0.1515 | 0.00937           | 0.02061                 | 0.01489                          |
| $\beta_{23}$ | 0.3         | 1.623   | -0.02319          | 1.21771                 | -0.04951                         |
| $\beta_{33}$ | 0.9         | 0.76    | -0.1124           | 0.96983                 | 0.44232                          |
| $\beta_{43}$ | -0.3        | -0.4955 | 0.0407            | -0.03142                | 0.04829                          |
| $\beta_{14}$ | -0.3        | -0.4951 | -0.58434          | -0.00845                | -0.3693                          |
| $\beta_{24}$ | 0.1         | -0.9279 | 0.28317           | -0.09393                | 0.8837                           |
| $\beta_{34}$ | 0.3         | -0.4852 | 1.51221           | -0.10254                | 3.90492                          |
| $\beta_{44}$ | 0.3         | 0.2066  | -0.3689           | 0.61166                 | 0.15671                          |
| $\alpha_1$   | 2           | 16.7985 | 2.91985           | 1.15325                 | 0.09526                          |
| $\alpha_2$   | 1.02106     | 42.1023 | 1.22855           | 19.75135                | 0.03591                          |
| $\alpha_3$   | 0.740671    | 20.7671 | -2.84687          | 8.94758                 | -0.0315                          |
| $\alpha_4$   | 2           | 17.8742 | 5.04906           | 5.29832                 | 0.00908                          |
| $\delta_1$   | 3.320835    | 9.5406  | 0.03335           | 1.17525                 | 0.00537                          |
| $\delta_2$   | 4.771945    | 20.564  | 0.03175           | 7.84299                 | 0.00869                          |
| $\delta_3$   | 1.214544    | 8.3144  | 4.2181            | 3.09948                 | 0.6299                           |
| $\delta_4$   | 3.668288    | 9.9207  | 0.05057           | 1.71729                 | 0.00224                          |

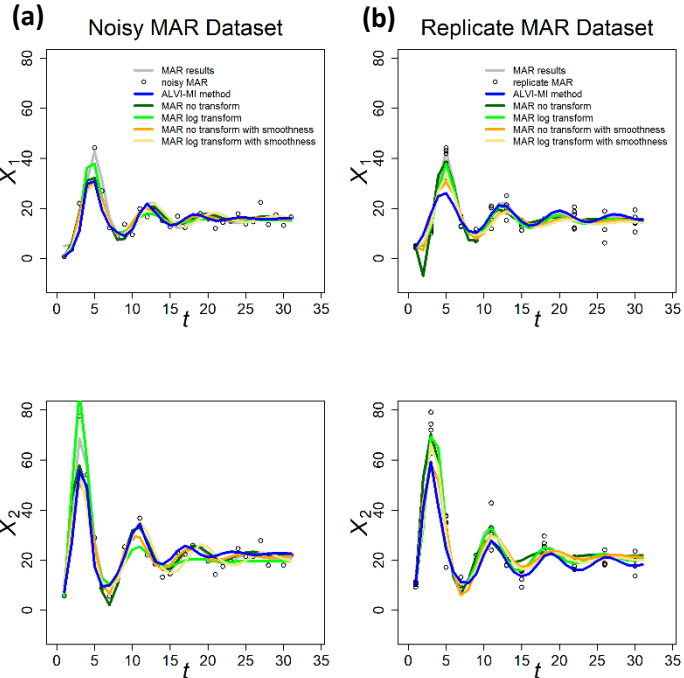

Replicate MAR

| Pars         | True Values | MAR     | MAR log transform | MAR with data smoothing | MAR log transform with smoothing |
|--------------|-------------|---------|-------------------|-------------------------|----------------------------------|
| $\beta_{11}$ | 0.45        | 0.1313  | 0.7550            | 0.4045                  | 0.8751                           |
| $\beta_{21}$ | -0.5        | -0.1997 | -1.2900           | -0.4620                 | -0.7421                          |
| $\beta_{31}$ | -0.2        | 0.0452  | -0.9240           | -0.0046                 | -0.3758                          |
| $\beta_{41}$ | 0.3         | 0.5716  | 0.7020            | 0.3775                  | 0.4040                           |
| $\beta_{12}$ | 0.5         | 0.6439  | 1.4000            | 0.3926                  | 0.8919                           |
| $\beta_{22}$ | 0.544635    | -0.0389 | -0.2100           | 0.0853                  | 0.4392                           |
| $\beta_{32}$ | -0.3        | -0.2161 | -1.4000           | -0.1873                 | -0.4188                          |
| $\beta_{42}$ | -0.1        | -0.2339 | 0.3570            | 0.0521                  | 0.1148                           |
| $\beta_{13}$ | -0.1        | -1.4212 | 0.4890            | -0.2147                 | 0.5447                           |
| $\beta_{23}$ | 0.3         | 3.2295  | -0.7320           | 2.0833                  | 0.0302                           |
| $\beta_{33}$ | 0.9         | 1.3301  | -0.1770           | 0.9647                  | 0.6010                           |
| $\beta_{43}$ | -0.3        | 0.5027  | 0.2900            | -0.2409                 | -0.0582                          |
| $\beta_{14}$ | -0.3        | -0.1848 | 1.6900            | 0.1292                  | 1.2788                           |
| $\beta_{24}$ | 0.1         | -0.2463 | -2.2500           | -1.0586                 | -0.6291                          |
| $\beta_{34}$ | 0.3         | -0.0189 | -2.4100           | -0.1712                 | -0.3419                          |
| $\beta_{44}$ | 0.3         | 0.5529  | 1.6100            | 0.8786                  | 0.9728                           |
| $\alpha_1$   | 1.02106     | -0.2209 | 0.0437            | 0.2503                  | 0.0305                           |
| $\alpha_2$   | 2           | 1.8693  | 0.0597            | 0.3678                  | 0.0240                           |
| $\alpha_3$   | 0.740671    | -0.1895 | -0.0261           | -0.2918                 | -0.0320                          |
| $\alpha_4$   | 2           | 0.0909  | -0.0257           | -0.1392                 | -0.0073                          |
| $\delta_1$   | 3.320835    | 0.0029  | 0.0000            | 3.2610                  | 0.0060                           |
| $\delta_2$   | 4.771945    | 3.7408  | 0.0010            | 10.8861                 | 0.0108                           |
| $\delta_3$   | 1.214544    | 0.0214  | 0.0018            | 0.6440                  | 0.0123                           |
| $\delta_4$   | 3.668288    | 0.8913  | 0.0000            | 1.9498                  | 0.0038                           |

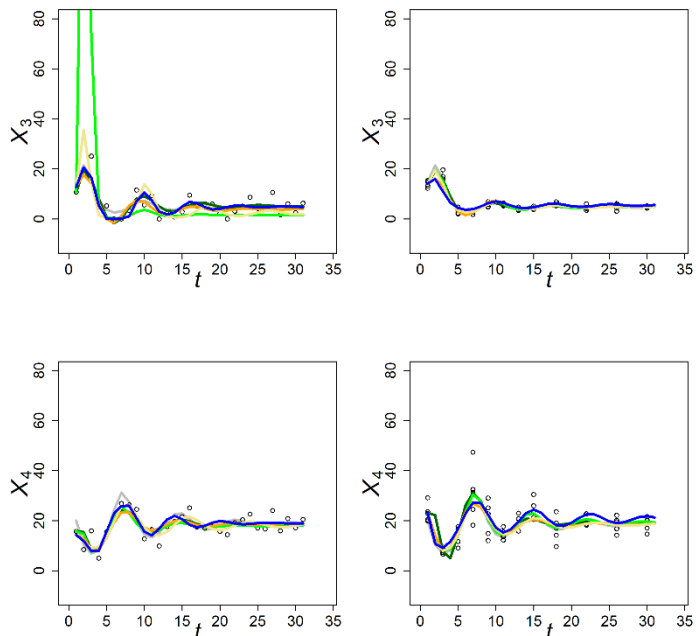

235 **Figure 2: MARSS and ALVI-MI methods applied to noisy (a) and replicate (b) MAR datasets.** Original synthetic  
 236 data are shown as gray dots, data with added noise as black circles. MAR estimates are presented in green,  
 237 orange and yellow. ALVI results are in blue. The variables of the noisy dataset were smoothed with 15DF-splines  
 238 and the ALVI-MI solution was calculated with spline points at times 2, 6, 15, 18 and 26. The variables of the replicate  
 239 dataset were smoothed with 15DF-splines and the ALVI-MI solution was calculated with spline points corresponding

240 to times 1, 3, 11, 13 and 15. Data and parameter estimates for ALVI can be seen in *Supplements* Table S5. SSEs for  
241 these fits are presented in Table 1 toward the end of the article.

242

243 In most cases, the different MAR models had difficulties retrieving the true parameters of the system, and  
244 sometimes even the correct sign (Figure 2). This is probably due to the small number of datapoints: Certain  
245 *et al.* (Certain et al., 2018) suggest that the length of the time series should be at least 5 times greater  
246 than the number of *a priori* nonzero elements in the matrix B in order to recover interaction signs  
247 correctly. Our sample has 31 observations and should have at least 80. For  $X_1$  and  $X_4$ , all models show a  
248 similar fit, but not for  $X_2$  and  $X_3$ , where MAR models with log transformation show a considerable deviation  
249 from the data.

250

### 251 **3.3. Case study 3: Experimental data from the literature, previously used for inferences with LV and** 252 **MAR models**

#### 253 **3.3.1. Published LV inferences**

254 Data from Georgy Gause's 1930s experiments and others were recently compiled in the R package *gauserR*  
255 (Mühlbauer *et al.* 2020). In the accompanying paper, the authors present five examples to test their  
256 method for estimating LV model parameters. We use the exact same examples to demonstrate to what  
257 degree LV and MAR methods are compatible with these real-world data and compare our results to those  
258 presented by Mühlbauer and colleagues. For more information regarding the original experimental data,  
259 see (Gause, 1934), (Huffaker, Shea, & Herman, 1963), (McLaren & Peterson, 1994) and (Mühlbauer et al.,  
260 2020). The results are presented in Figure 3, with data as symbols and various estimates as lines. SSEs of  
261 the different estimates for these and other test examples are presented in Table 1.

262 The MAR method never outperforms the other methods considered. To be fair, these examples had been  
 263 used to test actual data for compatibility with the LV structure, which may explain the superior  
 264 performance of the LV model. Nonetheless, these are the types of data the MAR method is supposed to  
 265 capture.

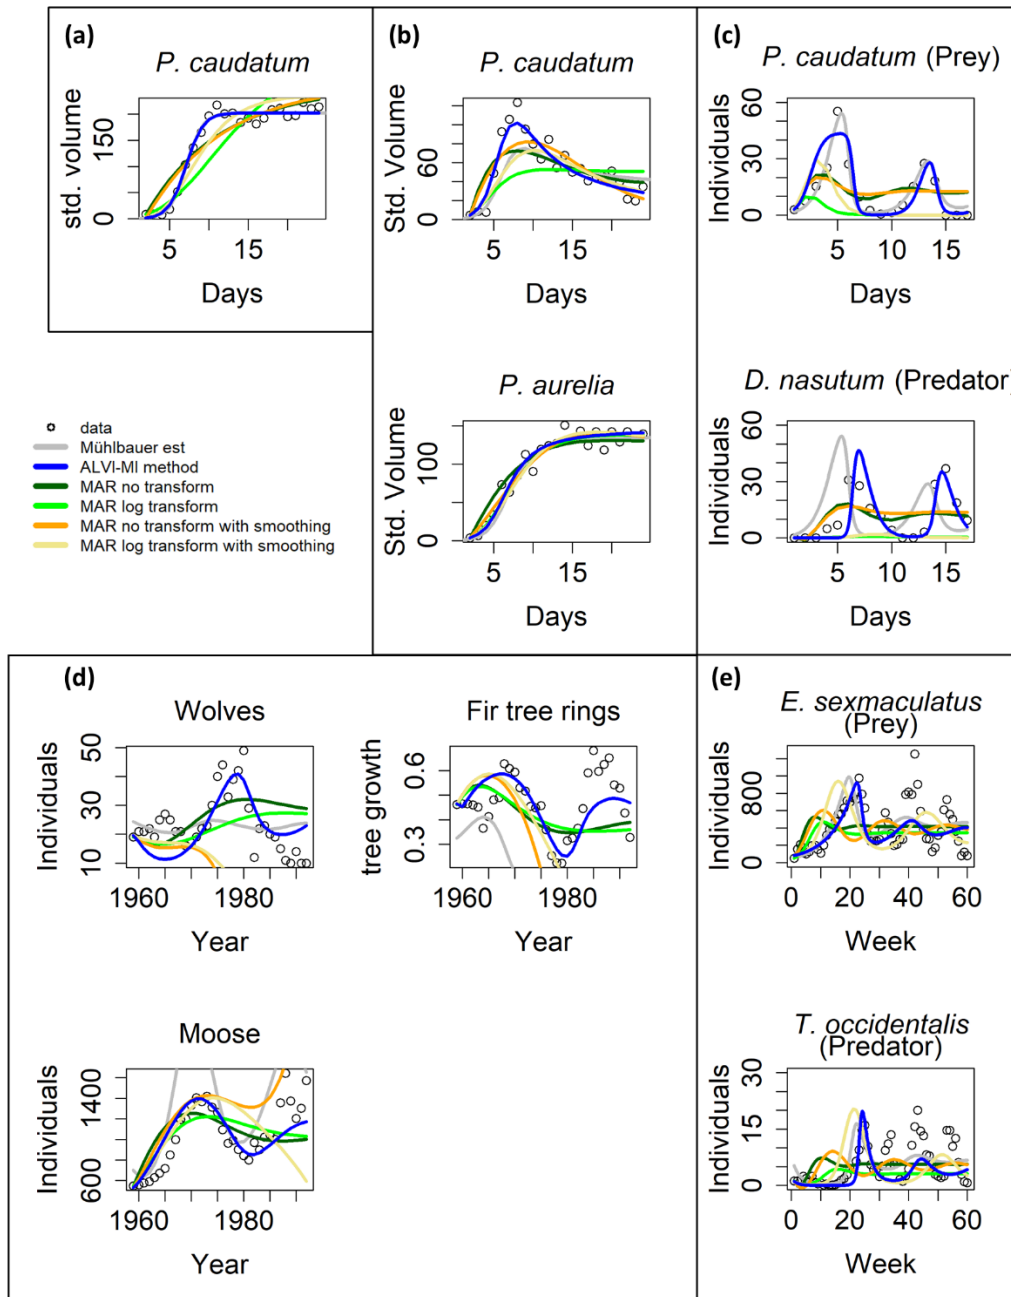

266



267 **Figure 3: Model inferences associated with Gause's data (Gause, 1934).** Circles show observations, gray lines are  
268 the estimates from Mühlbauer *et al.* (Mühlbauer *et al.*, 2020). ALVI-MI method estimates are presented as blue lines  
269 and MAR estimates as green, orange and yellow lines. See text and *Supplements* Tables S4.1 and S4.3 for further  
270 details.

271

272 For the case in Figure 3a, ALVI-MI yields the same results as found in (Mühlbauer *et al.*, 2020). In contrast,  
273 the MAR estimates are poor, with a very high estimate for the noise (Table S4.3), especially if one does  
274 not use log-abundances; this problem occurs in all cases presented in Figure 3. The data in Figure 3a are  
275 close to a logistic function, similar to  $X_4$  in the previous noisy dataset, where MAR also did not perform  
276 well.

277 Figure 3b shows data from a competition experiment between *Paramecium caudatum* and *Paramecium*  
278 *aurelia* that were co-cultured. Estimates for *P. aurelia* are similar for all methods but ALVI-MI exhibits  
279 clear superiority for *P. caudatum*.

280 The data in Figure 3c are complicated. Mühlbauer and colleagues noted that additional quantities of  
281 bacteria were introduced to avoid species extinction. Furthermore, many datapoints in this dataset are  
282 zero, which causes problems for the parameter estimators. As a remedy, we changed the zeros to  $10^{-5}$ ,  
283 but our initial estimates still produced poor fits. However, if we use the estimated trajectories from  
284 Mühlbauer *et al.* as “data,” quasi as a diagnostic measure, ALVI-MI captures the parameters that  
285 reproduce the fit of Mühlbauer *et al.*. This finding suggests that the initial poor fit is not a problem of LV  
286 adequacy. Instead, we hypothesize that the problem was caused by insufficient datapoints or almost-  
287 linear dependence, which affects the matrix inversion. To test this hypothesis, we used the first splines as  
288 data to create a second set of splines that has more datapoints to create the subsample to be used on  
289 ALVI-MI. We were able to achieve the presented fit, which is still somewhat inferior to the one by  
290 Mühlbauer *et al.*, but a considerable improvement over our initial fits.

291 When calculating splines for this dataset, it is difficult to choose degrees of freedom that capture both  
292 maxima. High degrees of freedom capture the global maxima but overshoot the local maxima. Low  
293 degrees of freedom capture the local but undershoot the global maxima. We suspect this to be the cause  
294 of ALVI's initial poor performance. Still, ALVI yields better fits than MAR.

295 The data in Figure 3d are also complicated, in this case due to two aspects. First, they show a stark  
296 difference in absolute numbers, with the abundance values for moose being several magnitudes higher  
297 than the numbers of tree rings. As a potential remedy, we normalized the fitting error for each dependent  
298 variable by dividing it by its mean to balance the SSE. The result is shown in Figure 3d. The LV models  
299 perform better than MAR, and MAR with log-abundances produces a better noise estimate than with the  
300 untransformed data.

301 The second issue is the fact that, around 1980, the wolves were exposed to a disease introduced by dogs  
302 that caused a precipitous drop in the population between 1981 and 1982 (Park Service, 2021). Typical  
303 mathematical models are not equipped to simulate such a black swan event, and the totality of results  
304 from the various methods suggests that neither LV nor MAR may be good models for this system, because  
305 none of the fits, by Mühlbauer *et al.*, ALVI, and MAR, are entirely satisfactory. Nonetheless, our ALVI  
306 results present a decent fit for moose and fir tree rings. To improve the fit to the wolf data, we divided  
307 the data into two groups, from 1959 to 1980 and from 1983 to the end of the series and estimated  
308 parameters for the two intervals. The results are presented in Figure S7 in orange lines. The fit is greatly  
309 improved, although still not perfect.

310 Figure 3e describes yet another complicated example. According to the inference, the ALVI-MI estimates  
311 fit the first peak well but the oscillations die down, in contrast to the data. Estimates from Mühlbauer *et*  
312 *al.* produce even poorer estimates, suggesting that the data may not be compliant with the LV structure.  
313 As in the previous example, MAR models do not capture the dynamics, although MAR with log-

314 abundances produces good noise estimates. Surprisingly, MAR with smoothing presented very poor fits  
315 to these data.

316 We repeated the analysis using ALVI-LR instead of ALVI-MI. The results were by and large similar and  
317 slightly inferior; they are shown in *Supplements* Figure S6 and Table S4.2.

318 One should note that Mühlbauer *et al.* used a steepest-descent method, while our method did not.  
319 Therefore, our results could possibly be further improved by adding a refinement cycle of steepest-  
320 descent optimization. The main problem of these algorithms, getting stuck in local minima, would  
321 presumably not be an issue, since the ALVI results are already close to the optimum.

322

### 323 **3.3.2. Published MAR inferences**

324 Here we use two datasets presented in the MAR inference package MARSS. The first dataset, “gray  
325 whales,” consists of 24 annual abundance estimates of eastern North Pacific gray whales during recovery  
326 from intensive commercial whaling prior to 1900 (Gerber, Demaster, & Kareiva, 1999). It is thus to be  
327 expected that the whales are initially far from the carrying capacity of the system. The second case  
328 consists of data for wolf and moose populations on Isle Royale in Lake Superior between 1960 to 2011;  
329 this dataset was used by Holmes and colleagues (Holmes et al., 2020) to demonstrate usage of the MARSS  
330 R package.

331

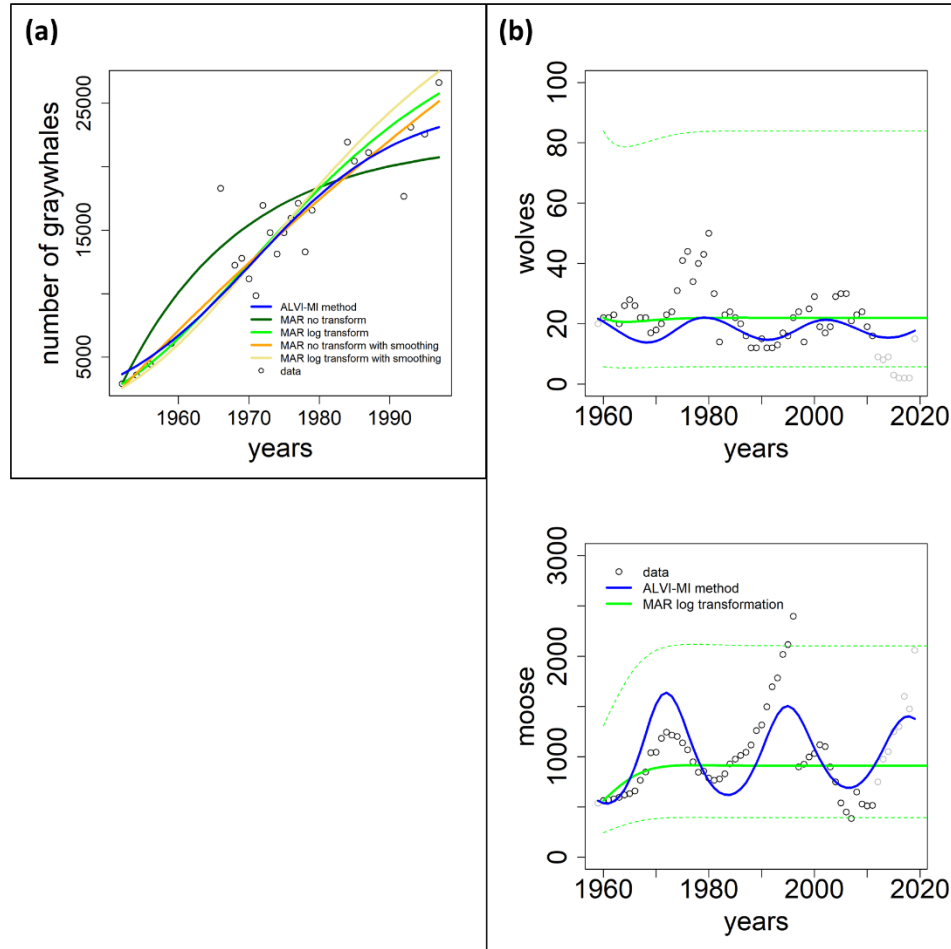

332

333 **Figure 4: Two datasets of wildlife observations.** Column a: Abundance data of gray whales (Gerber et al., 1999). The  
334 plot shows results from ALVI-MI in blue; MAR estimates are displayed with green, orange and yellow lines. Column  
335 b: Wolves and moose on Isle Royale (Vucetich, 2021). The original data used for parameter estimation are displayed  
336 with black circles, data not used by the estimation processes are shown in gray, ALVI-MI results are in blue, MAR  
337 estimates using log-abundances are displayed with green lines. The dashed lines indicate confidence intervals for  
338 the MAR estimates. Values of the estimates can be seen in Table S6.

339

340 Figure 4a show fits to the gray whale data (Gerber *et al.*, 1999). ALVI-MI noticeably outperforms MAR,  
341 even though the data came from a MAR demonstration. In particular, the MAR results suggest that the  
342 whales are close to regaining their carrying capacity, which seems to contradict the trend in the data. The  
343 SSEs can be seen in Table 1. It is unclear why the MAR method without transformation does not perform  
344 better. As it stands, the estimates are inadequate (with the highest SSE) and have a very high variance for

345 the error. An LV model with one variable is a logistic function, and the LV fit represents initial quasi-  
346 exponential growth that starts to slow down after a while. This behavior nicely reflects the fact that the  
347 whales were recovering from very small numbers due to overfishing but are apparently still much below  
348 the carrying capacity.

349 Figure 4b returns to the Isle Royale dataset from Vucetich (Vucetich, 2021), which we already used in the  
350 context of examples from the collection of Mühlbauer and colleagues (Mühlbauer et al., 2020); *cf.* Figure  
351 3. Holmes *et al.* (Holmes et al., 2020) used only the data of wolves and moose for a MAR analysis but  
352 extended them over a longer time horizon. Specifically, eight datapoints were added since the former  
353 usage of this dataset by Holmes and colleagues, from 2012 to 2020 (gray symbols in Figure 4b).

354 The results of the MAR model are identical with those published in (Holmes et al., 2020), with the same  
355 log transformation and z-scoring of the data, and the same parameter values were inferred. The result  
356 consists of acceptable estimates, although we found a slightly better fit without the z-scoring. Still, for a  
357 direct comparison, we opted to present the example exactly as Holmes *et al.* did. Interestingly, these fits  
358 miss all oscillatory behavior seen in the data. The ALVI results do show oscillations but clearly suffer from  
359 the disruption in the wolf population in 1981 and 1982, as discussed before.

360 Because we used in this example only MAR with log transformation, we display the confidence intervals  
361 for the MAR model as dashed green lines. Very few datapoints are outside the confidence intervals.

362

### 363 **3.4. Comparative summary of the performance of LV and MAR in the presented examples**

364 Inspection of Table 1 renders is evident that ALVI clearly performs better than MAR. In a few cases, the  
365 ALVI-LR solution gives a better SSE than ALVI-MI, but the difference between the two is not substantial.  
366 ALVI-LR appears to be superior when the data are noise-free.

367

368 **Table 1 – Sum of squared errors (SSE) of data fits for all experiments with ALVI-LR, ALVI-MI and four**  
 369 **variants of the MAR methods.** We also include SSEs for the estimates obtained by Mühlbauer *et al.* (2020)  
 370 for LV data presented in Figure 3. Bold values identify the lowest SSE score for each example. Examples  
 371 used in the Wilcoxon rank test are marked with asterisks.

|                       | Shown<br>in | ALVI-LR         | ALVI-MI          | MAR          | MAR logTrans   | MAR with<br>smoothing | MAR with log<br>and smoothing | Mühlbauer<br><i>et al.</i> | Test |
|-----------------------|-------------|-----------------|------------------|--------------|----------------|-----------------------|-------------------------------|----------------------------|------|
| Noisy LV dataset      | Fig. 1a     | 9.009           | <b>4.362</b>     | 37.31        | 53.31          | 7.364                 | 8.260                         |                            | *    |
| Replicate LV dataset  | Fig. 1b     | 11.41           | <b>2.953</b>     | 6.247        | 5.439          | 13.87                 | 42.83                         |                            | *    |
| Noisy MAR dataset     | Fig. 2a     | 2,727           | 1,142            | <b>908.3</b> | 37,447         | 1,191                 | 1,604                         |                            | *    |
| Replicate MAR dataset | Fig. 2b     | 2,518           | 1,462            | 933.1        | <b>177.967</b> | 1,773                 | 1,482                         |                            | *    |
| SynthData1            | Fig. S5a    | <b>3.29E-07</b> | 9.04E-07         | 10.49        | 4.626          |                       |                               |                            |      |
| SynthData2            | Fig. S5b    | 8.68E-06        | <b>8.57E-06</b>  | 3.029        | 5.876          |                       |                               |                            |      |
| SynthData3            | Fig. S5c    | <b>0.002</b>    | 0.018            | 5.111        | 4.378          |                       |                               |                            |      |
| SynthData4            | Fig. S5d    | <b>5.65E-04</b> | 2.10E-02         | 2.47E+04     | 3.99E+35       |                       |                               |                            |      |
| SynthData5            | Fig. S5e    | <b>7.048</b>    | 18.94            | 16.59        | 15.70          |                       |                               |                            |      |
| SynthData6            | Fig. S5f    | 71.27           | <b>28.36</b>     | 7,379,825    | 174.2          |                       |                               |                            |      |
| Mühlbauer et al. 1    | Fig. 3a     | 2,588           | <b>2,516</b>     | 18,160       | 51,738         | 17,877                | 16,399                        | 3271                       | *    |
| Mühlbauer et al. 2    | Fig. 3b     | 6,204           | <b>4,781</b>     | 13,016       | 22,162         | 9,293                 | 12,447                        | 40604                      | *    |
| Mühlbauer et al. 3    | Fig. 3c     | 24,183          | <b>2,191</b>     | 4,619        | 10,146         | 4,780                 | 8,795                         | 578.1                      | *    |
| Mühlbauer et al. 4    | Fig. 3d     | 17,700,169      | <b>1,118,350</b> | 2,199,174    | 17,77,559      | 9,904,281             | 3,973,876                     | 7934136                    | *    |
| Mühlbauer et al. 5    | Fig. 3e     | 12,114,811      | <b>2,251,804</b> | 4,245,588    | 4,450,871      | 5,596,187             | 4,554,089                     | 2893764                    | *    |
| Holmes et al. 1       | Fig. 4a     | 168,134,153     | 153,703,251      | 217,478,452  | 166,186,993    | <b>143,728,190</b>    | 212,424,910                   |                            | *    |
| Holmes et al. 2       | Fig. 4b     | 32,326,913      | <b>5,556,585</b> | 10,267,681   | 10,947,294     | 11,136,306            | 14,342,449                    |                            | *    |

372

373

374 We used a one-sided Wilcoxon rank test to see if the differences in performance are significant. The  
 375 results and alternative hypotheses for these tests are presented in Table 2.

376 **Table 2 - Test results of one-sided Wilcoxon rank.**

| Null hypothesis $H_0$ :                                                                                                            | Alternative hypothesis $H_1$ :                                                                                          | $p$ -value    |
|------------------------------------------------------------------------------------------------------------------------------------|-------------------------------------------------------------------------------------------------------------------------|---------------|
| SSE values of ALVI-MI are equal or higher than corresponding MAR values                                                            | SSE values of ALVI-MI are less than corresponding MAR values                                                            | <b>0.0093</b> |
| SSE values of ALVI-MI are equal or higher than corresponding MAR values for log transformed variables                              | SSE values of ALVI-MI are less than corresponding MAR values for log transformed variables                              | <b>0.0024</b> |
| SSE values of ALVI-MI are equal or higher than corresponding MAR values for smoothed data                                          | SSE values of ALVI-MI are less than corresponding MAR values for smoothed data                                          | <b>0.0269</b> |
| SSE values of ALVI-MI are equal or higher than corresponding MAR values for log transformed variables and smoothed data            | SSE values of ALVI-MI are less than corresponding MAR values for log transformed variables and smoothed data            | <b>0.0005</b> |
| SSE values of the ALVI-MI are equal or higher than SSE values obtained with the ALVI-LR                                            | SSE values of ALVI-MI are less than SSE values obtained with the ALVI-LR                                                | <b>0.0005</b> |
| SSE values of MAR with data smoothing are equal or higher than MAR values without                                                  | SSE values of MAR with data smoothing are less than MAR values without                                                  | 0.7676        |
| SSE values of MAR with log transformation and data smoothing are equal or higher than those for MAR with log transformation values | SSE values of MAR with log transformation and data smoothing are less than those for MAR with log transformation values | 0.7935        |

377

378

379 The data supports that the ALVI-MI method produces smaller SSE's than the other methods considered.

380 Also, in the last two tests, the data do not show evidence that data smoothing reduces the SSE's in MAR.

381 Comparing the results ALVI-LR and ALVI-MI with respect to the absolute value of the difference between

382 true and estimated parameters, we obtained mixed results (Table 3). Indeed, a one-sided Wilcoxon rank

383 test with the alternative hypothesis that the absolute errors in parameter values associated with ALVI-LR

384 were smaller than those associated with ALVI-MI did not yield a significant  $p$ -value (0.2783).

385

386 **Table 3 – Absolute differences between true and estimated parameters for ALVI-LR and ALVI-MI.** Bold  
387 font indicates the lower difference in each case. A statistical test did not reject the null hypothesis of no  
388 difference between the results of the two methods.

|                    | ALVI-LR        | ALVI-MI        |
|--------------------|----------------|----------------|
| Noisy Data 5%      | <b>1.97538</b> | 2.68019        |
| Replicate Data 5%  | <b>0.24117</b> | 0.32537        |
| Noisy Data 20%     | <b>1.35692</b> | 46.60082       |
| Replicate Data 20% | 0.8835         | <b>0.66838</b> |
| Synthetic Data 1   | <b>0.00021</b> | 0.00038        |
| Synthetic Data 2   | 0.20832        | <b>0.15534</b> |
| Synthetic Data 3   | 1.06975        | <b>0.0982</b>  |
| Synthetic Data 4   | <b>0.19183</b> | 0.60795        |
| Synthetic Data 5   | 0.82403        | <b>0.36212</b> |
| Synthetic Data 6   | <b>0.18794</b> | 0.97794        |

389

390

391 Comparing the values in Tables 1 and 3 for noisy and replicate datasets, the latter presented smaller

392 values. However, using the one-sided Wilcoxon rank test for the values in Table 1 with the alternative

393 hypothesis—that the SSE values for the replicate dataset were smaller than those for the noisy datasets—

394 did not yield a significant  $p$ -value (0.2734). For the values in Table 3, the test produced a  $p$ -value (0.0625)

395 smaller than 0.1, suggesting that time series data are better than clustered data for parameter estimation  
396 in LV using ALVI.

397

#### 398 **4. Discussion**

399 We have compared LV and MAR models using, as parameter estimation strategies, a recently introduced  
400 ALVI method for LV models (Voit et al., 2021) and the established MARSS method for MAR models  
401 (Holmes et al., 2012). Summary Table 1 renders it evident that ALVI usually outperforms MARSS, with  
402 often substantially lower SSE values, and that LV models in the vast majority of cases provide better  
403 representations than MAR models. Furthermore, Certain *et al.* (Certain et al., 2018) prescribed the  
404 length of the data series as at least 5 times greater than the number of nonzero interaction elements in  
405 order to recover interaction signs correctly. A caveat is that we presented the MAR model equations  
406 without noise, thereby ignoring an important part of these models that characterizes the stochastic  
407 structure of the data.

408 ODEs and MAR models are derived from different philosophies and comparing them fairly is not  
409 straightforward. Here we compared the two approaches from a point of view of someone who is more  
410 interested in capturing the dynamics of a phenomenon, which poses an immediate disadvantage for MAR  
411 models, because they were created for phenomena with random noise and for characterizing the  
412 structure of this noise. Consequently, we found much of the dynamics quantified as noise in the estimates.  
413 Thus, an overarching conclusion is that the two approaches are different tools that are adequate in  
414 different situations. MAR models are well suited for simulations with variables presenting low abundances  
415 and investigations where the quantification of noise is relevant. By contrast, LV models, and ODE models  
416 in general, are better suited to capture the dynamics of a phenomenon and for cases where the  
417 dependent variables have high abundances and a high signal-to-noise ratio. Nonetheless, if the



418 characterization of noise is of interest, one might subtract the LV fit from the raw data and then assessing  
419 the remainder. Another advantage of LV models is that ALVI permits *a priori* tests for the adequacy of the  
420 LV structure for a given dataset (Voit et al., 2021).

421 Because the LV structure is continuous, we can evaluate it at any point or choose any interval between  
422 the points in the numerical solution. By contrast, MAR does not truly reveal a time resolution higher than  
423 its intrinsic interval between solution points. However, Holmes *et al.* (Holmes et al., 2012) demonstrated  
424 with the MARSS R function that it is feasible to interpolate any number of missing values between the  
425 known datapoints, and that this method can be used to decrease the time unit for stepping forward. While  
426 this step does not make the MAR model as densely time-resolved as an ODE model, it mitigates the  
427 apparent granularity disadvantage considerably.

428 ALVI allows a choice between linear regression and matrix inversion. The former is simpler, because it  
429 uses all points available, and faster due to the fact that no data sample needs to be chosen. In most cases  
430 tested, it also produces good fits and estimates. However, the latter usually produces slightly better  
431 results and works well even in cases where the ALVI-LR solution fails (Table 1). It also offers a natural  
432 approach to inferring whole ensembles of well-fitting model parameterizations.

433 Results obtained with MARSS or with ALVI-LR are rather robust if the data are noisy, whereas solutions  
434 with ALVI-MI may be sensitive to small alterations in the data. As an example, consider the synthetic MAR  
435 data presented in Figure 2, where we added noise as a normally distributed variable with mean zero and  
436 standard deviation of 0.2 of the dependent variable mean. For comparison, consider now an alternative  
437 sample (Figure S8) obtained by applying the same procedure, but with a different seed for noise creation.  
438 The alternative dataset is almost indistinguishable from the original dataset in Figure 2, but using the same  
439 point sample determined for the original dataset, ALVI-MI produces different parameter values. This  
440 means that if we calculate a new set of splines, we should also search for a new point sample. The

441 conclusion is that, although the inferred fits are similarly good, the parameter values associated with the  
442 best fit for a noisy point sample may not be optimal for another noisy sample, which may not be surprising.  
443 In fact, we showed in a different example with noise that the inferred parameter values yielded a better  
444 SSE than even the true values (Section 3.1). The argument may also be turned around into a positive  
445 feature: Different noisy datasets or subsamples of these datasets can easily be used to create natural  
446 ensembles of models that characterize the underlying data in a robust manner and yield additional  
447 insights into the variability of the model parameters.

448 The MARSS software makes modeling with MAR models easy, although not entirely automatic, as many  
449 options must be tested to find the one that returns the best fit in each case. For example, one must decide  
450 whether to use estimated initial conditions or the initial datapoints and which variables should have the  
451 same noise level. By contrast, the ALVI method for LV models is novel (Voit et al., 2021), and while all  
452 steps are straightforward and code is available on GitHub [[https://github.com/LBSA-VoitLab/Comparison-  
453 Between-LV-and-MAR-Models-of-Ecological-Interaction-Systems](https://github.com/LBSA-VoitLab/Comparison-Between-LV-and-MAR-Models-of-Ecological-Interaction-Systems)], no formally published software  
454 currently exists that encompasses all these steps in a streamlined manner. As a new tool, ALVI offers  
455 several avenues for further refinement. One important component is optimal data smoothing with  
456 splines, which requires the determination of a suitable number of degrees of freedom and may also  
457 employ weights for different variables within a dataset.

458 A comparison of MARSS results with or without log transformation of the dependent variable abundances  
459 did not yield clear results. If the MAR models are to be viewed as a multispecies competition models with  
460 Gompertz density dependence (Certain et al., 2018), the log transformation is required (*Supplements*  
461 Section 1.3). While inferences for LV models usually benefit from smoothing, the same is not true for MAR  
462 model, where smoothing in some cases, but certainly not always, led to improved data fits (Table 2).

463 MARSS uses a steepest decent optimization step, which ALVI presently does not. Although ALVI already  
464 performs better than MARSS (Table 1), it might be possible to improve its results even further by adding  
465 a refinement step based on steepest-descent optimization. Steepest-descent methods tend to get  
466 trapped in local minima if the initial guesses are poor, but ALVI would not likely encounter this problem,  
467 as the solutions are already very good and could be used directly as initial guesses for the refinement step.  
468 Estimation and inference methods typically do not scale well. ALVI bucks this trend, at least to some  
469 degree, as both the smoothing and estimation of slopes occur one equation at a time. Thus, instead of  
470 scaling quadratically, the inference problem scales linearly. The ultimate matrix inversion or linear  
471 regression is essentially the same for all realistically sized models. Thus, the only time-consuming step  
472 within ALVI-MI is the choice of datapoints. An exhaustive test for all combinations grows quickly in  
473 complexity, but it is always possible to opt for a random search. The resulting solution is not necessarily  
474 the best possible, but can still provide an excellent fit or at least a valuable starting point for a steepest-  
475 decent refinement optimization. Importantly, many random solutions can also be collated to establish an  
476 ensemble of well-fitting models, which in most cases yields more insight than a single optimized solution.

477

## 478 **5. Acknowledgements**

479 This work was supported in part by the following grant: NIH-2P30ES019776-05 (PI: Carmen Marsit).

480 The funding agency is not responsible for the content of this article.

481

482 **6. Author Contributions**

483 D.V.O., J.D.D., and E.O.V. conceived this project, performed the literature review, created the synthetic  
484 data examples and wrote of the manuscript. D.V.O. produced the code required for the study. All  
485 authors reviewed and edited the manuscript.

486

487 **7. Data Accessibility**

488 The R code for running the experiments is available on GitHub:

489 [https://github.com/LBSA-VoitLab/Comparison-Between-LV-and-MAR-Models-of-Ecological-Interaction-](https://github.com/LBSA-VoitLab/Comparison-Between-LV-and-MAR-Models-of-Ecological-Interaction-Systems)  
490 [Systems](https://github.com/LBSA-VoitLab/Comparison-Between-LV-and-MAR-Models-of-Ecological-Interaction-Systems)

491

492 **8. Additional Information**

493 **Competing financial interests**

494 The authors declare no competing interests.

495

496 **9. References**

497 Certain, G., Barraquand, F., & Gårdmark, A. (2018). How do MAR(1) models cope with hidden  
498 nonlinearities in ecological dynamics? *Methods in Ecology and Evolution*, 9(9), 1975–1995.

499 doi:10.1111/2041-210X.13021

500 Chou, I. C., & Voit, E. O. (2009). Recent developments in parameter estimation and structure

501 identification of biochemical and genomic systems. *Mathematical Biosciences*, 219(2), 57–83.

- 502           doi:10.1016/j.mbs.2009.03.002
- 503   Cleveland, W. S. (1981). LOWESS: A program for smoothing scatterplots by robust locally weighted  
504           regression. *The American Statistician*, *35*(1), 54. doi:10.2307/2683591
- 505   Dam, P., Fonseca, L. L., Konstantinidis, K. T., & Voit, E. O. (2016). Dynamic models of the complex  
506           microbial metapopulation of lake mendota. *Npj Systems Biology and Applications*, *2*(1), 16007.  
507           doi:10.1038/npjbsa.2016.7
- 508   Dam, P., Rodriguez-R, L. M., Luo, C., Hatt, J., Tsementzi, D., Konstantinidis, K. T., & Voit, E. O. (2020).  
509           Model-based comparisons of the abundance dynamics of dacterial communities in two lakes.  
510           *Scientific Reports*, *10*(1), 1–12. doi:10.1038/s41598-020-58769-y
- 511   Dennis, B., & Taper, M. L. (1994). Density Dependence in Time Series Observations of Natural  
512           Populations: Estimation and Testing. *Ecological Monographs*, *64*(2), 205–224.  
513           doi:10.2307/2937041
- 514   Gause, G. F. (1934). Experiemental analysis of Vito Volterra’s mathematical theory of the struggle for  
515           existence. *Science*, *79*(2036), 16–17. doi:10.1126/science.79.2036.16-a
- 516   Gavin, C., Pokrovskii, A., Prentice, M., & Sobolev, V. (2006). Dynamics of a Lotka-Volterra type model  
517           with applications to marine phage population dynamics. *Journal of Physics: Conference Series*,  
518           *55*(1), 80–93. doi:10.1088/1742-6596/55/1/008
- 519   Gerber, L. R., Demaster, D. P., & Kareiva, P. M. (1999). Gray whales and the value of monitoring data in  
520           implementing the U.S. endangered species act. *Conservation Biology*, *13*(5), 1215–1219.  
521           doi:10.1046/j.1523-1739.1999.98466.x
- 522   Holmes, E. E., Ward, E. J., & Scheuerell, M. D. (2020). Analysis of multivariate timeseries using the

- 523 MARSS package. Seattle: Northwest Fisheries Science Center, NOAA. Retrieved from [https://cran.r-](https://cran.r-project.org/package=MARSS/vignettes/UserGuide.pdf)  
524 [project.org/package=MARSS/vignettes/UserGuide.pdf](https://cran.r-project.org/package=MARSS/vignettes/UserGuide.pdf)
- 525 Holmes, E. E., Ward, E. J., & Wills, K. (2012). MARSS: multivariate autoregressive state-space models for  
526 analyzing time-series data. *The R Journal*, 4(1), 11. doi:10.32614/RJ-2012-002
- 527 Huffaker, C. B., Shea, K. B., & Herman, S. G. (1963). Experimental studies on predation: dispersion  
528 factors and predator-prey oscillations. *Hilgardia*, 34, 305–330. Retrieved from  
529 <http://hilgardia.ucanr.edu/fileaccess.cfm?article=152594&p=ZPTIMD>
- 530 Ives, A. R. (1995). Predicting the response of populations to environmental change. *Ecology*, 76(3), 926–  
531 941. doi:10.2307/1939357
- 532 Knowles, I., & Renka, R. J. (2014). Methods for Numerical Differentiation of Noisy Data. *Electronic*  
533 *Journal of Differential Equations*, 21, 235–246. Retrieved from [https://ejde.math.txstate.edu/conf-](https://ejde.math.txstate.edu/conf-proc/21/k3/knowles.pdf)  
534 [proc/21/k3/knowles.pdf](https://ejde.math.txstate.edu/conf-proc/21/k3/knowles.pdf)
- 535 Lotka, A. J. (1925). *Elements of Physical Biology*. Baltimor: Williams & Wilkins Company. Retrieved from  
536 <https://archive.org/details/elementsofphysic017171mbp>
- 537 May, R. M. (2001). *Stability and complexity in model ecosystems*. Princeton University Press.  
538 doi:10.1515/9780691206912
- 539 McLaren, B. E., & Peterson, R. O. (1994). Wolves, moose, and tree Rings on Isle Royale. *Science*,  
540 266(5190), 1555–1558. doi:10.1126/science.266.5190.1555
- 541 Mendes, P., & Kell, D. (1998). Non-linear optimization of biochemical pathways: applications to  
542 metabolic engineering and parameter estimation. *Bioinformatics*, 14(10), 869–883.  
543 doi:10.1093/bioinformatics/14.10.869

- 544 Mühlbauer, L. K., Schulze, M., Harpole, W. S., & Clark, A. T. (2020). gauseR: Simple methods for fitting  
545 Lotka-Volterra models describing Gause's "Struggle for Existence". *Ecology and Evolution*, *10*(23),  
546 13275–13283. doi:10.1002/ece3.6926
- 547 Park Service, N. (2021). Why relocate wolves to Isle Royale? Retrieved from  
548 <https://home.nps.gov/isro/learn/why-relocate-wolves-to-isle-royale.htm>
- 549 Rykiel, E. J. (1996). Testing ecological models: the meaning of validation. *Ecological Modelling*, *90*(3),  
550 229–244. doi:10.1016/0304-3800(95)00152-2
- 551 Sachs, A., & Goetze, A. (1945). *Mathematical cuneiform texts: 29 (American Oriental)*. (O. Neugebauer,  
552 Ed.). New Haven: American Oriental Society. Retrieved from  
553 <https://www.jstor.org/stable/1359232?seq=1>
- 554 Savageau, M. A. (1979). Allometric morphogenesis of complex systems: Derivation of the basic  
555 equations from first principles. *Proceedings of the National Academy of Sciences*, *76*(12), 6023–  
556 6025. doi:10.1073/pnas.76.12.6023
- 557 Shenhav, L., Furman, O., Briscoe, L., Thompson, M., Silverman, J. D., Mizrahi, I., & Halperin, E. (2019).  
558 Modeling the temporal dynamics of the gut microbial community in adults and infants. *PLOS*  
559 *Computational Biology*, *15*(6), e1006960. doi:10.1371/journal.pcbi.1006960
- 560 Sims, C. A. (1980). Macroeconomics and reality. *Econometrica*, *48*(1), 1. doi:10.2307/1912017
- 561 Stein, R. R., Bucci, V., Toussaint, N. C., Buffie, C. G., Räscher, G., Pamer, E. G., ... Xavier, J. B. (2013).  
562 Ecological modeling from time-series inference: insight into dynamics and stability of intestinal  
563 microbiota. *PLoS Computational Biology*, *9*(12), e1003388. doi:10.1371/journal.pcbi.1003388
- 564 Varah, J. M. (1982). A spline least squares method for numerical parameter estimation in differential

565 equations. *SIAM Journal on Scientific and Statistical Computing*, 3(1), 28–46. doi:10.1137/0903003

566 Voit, E. O., & Almeida, J. (2004). Decoupling dynamical systems for pathway identification from  
567 metabolic profiles. *Bioinformatics*, 20(11), 1670–1681. doi:10.1093/bioinformatics/bth140

568 Voit, E. O., & Chou, I.-C. (2010). Parameter estimation in canonical biological systems models.  
569 *International Journal of Systems and Synthetic Biology*, 1(June), 1–19.

570 Voit, E. O., Davis, J. D., & Olivença, D. V. (2021). Inference and validation of the structure of Lotka-  
571 Volterra models. *BioRxiv*. doi:10.1101/2021.08.14.456346

572 Voit, E. O., & Savageau, M. A. (1982). Power-law approach to modeling biological systems; II. Application  
573 to ethanol production. *J. Ferment. Technol.*, 60(3), 229–232.

574 Volterra, V. (1926). *Variazioni fluttuazioni del numero d'individui in specie conviventi. Men Acad Lincei.*

575 Vucetich, J. A. (2021). Wolves and moose of Isle Royale. Retrieved from <https://isleroyalewolf.org/>

576 Wedelin, D., & Gennemark, P. (2007). Efficient algorithms for ordinary differential equation model  
577 identification of biological systems. *IET Systems Biology*, 1(2), 120–129. doi:10.1049/iet-  
578 syb:20050098

579

580

581

582

583

584



585

586

587

588

589

## 590 **SUPPLEMENTS**

### 591 **Comparison Between Lotka-Volterra and Multivariate Autoregressive Models of** 592 **Ecological Interaction Systems**

593

594 **Daniel V. Olivença, Jacob D. Davis, Eberhard O. Voit**

595

## 596 **1. Materials and Methods**

### 597 **1.1. Lotka-Volterra models**

598 For a single variable, Lotka-Volterra (LV) models (Eq. [1] in the main text) reduce to the well-known logistic  
599 growth law

$$600 \quad \frac{dX_{i,t}}{dt} = a_i X_{i,t} - b_{ii} X_{i,t}^2 \quad [S1]$$

601 where the ratio  $a_i/b_{ii}$  is called the “carrying capacity” of the system, which corresponds to the non-trivial  
602 steady state. If time-dependent environmental inputs are to be considered, one may add terms  $\gamma_i X_i U_t$ ,  
603 where  $U_t$  is an element of a vector of these inputs and the coefficients  $\gamma_i$  are weights that quantify the  
604 effects of the factors on species  $X_i$  (Stein et al., 2013; Dam et al., 2016; Dam et al., 2020). The index  $t$  is  
605 usually omitted, and the left-hand side is often written as  $\dot{X}_i$ .

606 The LV system is a *canonical* model in the sense that its mathematical structure is immutable and scalable  
607 to any dimension (Voit, 2000). Such a canonical model may serve as a template to construct models of  
608 different systems that reasonably satisfy the following assumptions:

- 609 • encounters between and within species are representable by mass action kinetics;

- 610 • the environment does not change during the process, unless environmental variables are
- 611 explicitly formulated as described above;
- 612 • the parameter values do not change during an experiment;
- 613 • the species respond to one another instantaneously;
- 614 • for very small population sizes, interactions are negligible and the rate of change (growth) of each
- 615 population is initially proportional to its size, resulting in initial exponential growth;
- 616 • adaptations of species are absent or negligible.

617 Although the model structure and these assumptions might appear to be unduly rigid, LV models are  
618 extremely rich in the repertoire of their possible responses. In fact, the LV structure was shown to be  
619 capable of modeling any type of differentiable nonlinearities, including different kinds of oscillations and  
620 chaos (Vano et al., 2006), if sufficiently many auxiliary variables are permitted, some of which have  
621 mathematical, but no real biological meaning (Voit & Savageau, 1986; Peschel & Mende, 1986; Savageau  
622 & Voit, 1987). At the same time, the LV structure has severe limitations. For example, it is not well suited  
623 for metabolic pathway systems, because a simple conversion of a substrate  $X_1$  into a product  $X_2$  would  
624 require  $X_2$  to appear in its own synthesis term, although the generation of  $X_2$  in truth depends only on  $X_1$   
625 and possibly some modulators (see (Voit, 2013) for this and other limitations).

626 LV models were initially used to describe the dynamics of predator and prey populations or of populations  
627 that compete for the same resources, but the same equations have also been used in entirely different  
628 contexts and fields, including physics (Nambu, 1986; Hacinliyan, Kusbeyzi, & Aybar, 2010), pollution  
629 assessment (Haas, 1981), economy (Zhou & Chen, 2006; Gandolfo, 2008), manufacturing (Chiang, 2012),  
630 and sales (Hung, Chiu, Huang, & Wu, 2017).

631 Beyond the fact that LV models can be formulated very easily, another significant advantage over other  
632 systems of nonlinear ODEs is the fact that LV models can be parameterized with linear regression methods  
633 if time series data are available (Voit & Chou, 2010). As an intriguing alternative, the linearity also permits  
634 us to select variable and slope values at  $n+1$  time points and to obtain parameter inferences by solving a  
635 set of linear algebraic equations (see below). It is furthermore possible to estimate parameter values from  
636 sufficiently many profiles of species that initially coexist and ultimately survive under comparable  
637 conditions (Voit et al., 2021).

638

## 639 **1.2. Estimation of LV Parameters Based on Slopes of Time Courses**

640 This section explains in detail an approach to parameter estimation that uses the Algebraic Lotka-Volterra  
641 Inference (ALVI) method. For a detailed explanation of the ALVI method itself please see (Voit et al., 2021).

642

### 643 **1.2.1. Smoothing**

644 Even though one might consider smoothing a conceptually separate issue from the actual parameter  
645 inference, the two are so closely intertwined in our analysis that it appears useful to discuss smoothing  
646 options. The goal is two-fold. First, it is beneficial to reduce or even remove noise from the raw data, and  
647 second, this smoothing greatly aids the determination of slopes of the experimental time courses (see  
648 later).

649 A smoothed representation of a dataset implicitly integrates information that is not in the data. This  
650 implicit integration step is not entirely unbiased and requires prudent judgment, because it must answer  
651 the following questions, often without true knowledge of the system: Are the deviations between the  
652 data and the smoothing function due to (stochastic) noise or are they part of the true signal? For instance,

653 are they the trace of true oscillations? Also, if very few data points deviate much more than all others  
654 from the smoothing function, are they true peaks or valleys or are they statistical outliers? It is difficult to  
655 answer these questions objectively, but two features of the data are of great benefit: First, if the variation  
656 in noise amplitude is much smaller than the range of signal values (high signal-to-noise-ratio), the  
657 distinction between signal and noise is relatively straightforward. Second, if the data come in replicates,  
658 they may support or refute the potential of true oscillations or peaks at certain time points in the data.  
659 Even if only one dataset is available, the biologist familiar with the phenomenon at hand usually has  
660 developed an expectation regarding signal and noise, and if there is no biological rationale for expecting  
661 oscillations or strong deviations from some simple trend, the smoothing strategies are flexible enough to  
662 allow the integration of the biologist's knowledge and expectations. The result of the smoothing process  
663 therefore is a synthesis of all relevant information, constrained by external knowledge and reasonable  
664 expectations. Of course, it is also feasible to create alternative models with different thresholds between  
665 signal and noise and to analyze them side by side.

666 Independent of the options and intricacies of obtaining smoothed time courses of all variables, it is well  
667 known that the process of estimating slopes from data is more strongly affected by noise than the data  
668 themselves (Knowles & Renka, 2014). Expressed differently, if the noise is left unchecked, its effect on the  
669 estimated values of the slopes tends to be higher than its effect on the values of the variables.

670 We explored a number of methods for smoothing the time course data and keeping the noise in check  
671 (Eilers, 2003; Vilela et al., 2007; Batista Júnior & Pires, 2014), cognizant of the fact that empirical raw data  
672 alone do not provide enough information of what is noise and what is relevant signal in the dynamics of  
673 the phenomenon under study.

674 One of the simplest approaches is the *three-point method*, where the slope at time point  $t_k$  is taken as the  
675 average of the slopes at time points  $t_{k-1}$  and  $t_{k+1}$  (Burden, Faires, & Burden, 1993; Voit & Almeida, 2003).

676 More sophisticated methods were reviewed in (Cleveland & Grosse, 1991; Eilers & Marx, 1996; Batista  
677 Júnior & Pires, 2014). For long, dense time series, moving average and collocation methods with or  
678 without roughness penalty (Ramsay et al., 2007) are often very effective. However, they tend to be  
679 unsuited for biological time series data because the measurements are usually quite sparse and obtained  
680 over a relatively short time horizon.

681 Smoothing splines and *local regression* methods like LOESS (locally estimated scatterplot smoothing) and  
682 LOWESS (locally weighted scatterplot smoothing) turned out to be particularly useful. A detailed  
683 description of these methods can be found in (Cleveland, 1981).

684 In a nutshell, splines are piecewise polynomial functions that: pass through all sample points, are  
685 continuous and have first and second derivatives that are continuous at junction points between adjacent  
686 intervals. In a smoothing spline, the first condition is substituted by a least-squares fit that is balanced  
687 with an additional criterion that penalizes splines with high second derivative values, which indicate local  
688 roughness (Cleveland, 1979; Garcia, 2010; Loader, 2012).

689 LOESS and LOWESS algorithms use locally-weighted polynomial regression. LOWESS is used for univariate  
690 smoothing and consists of computing a series of local linear regressions, with each local regression  
691 restricted to a window of x-values. Smoothness is achieved by using overlapping windows and by gradually  
692 down-weighting points in each regression according to their distance from the anchor point of the window.  
693 LOESS is for fitting a smooth surface to multivariate data and it is a generalization of LOWESS in that locally  
694 weighted univariate regressions are simply replaced by locally weighted multiple regressions. While LOESS  
695 is more versatile, LOWESS is faster and sometimes succeeds when LOESS fails (Cleveland, 1979; Cleveland  
696 & Devlin, 1988; Smyth, 2020). Locally-weighted polynomial regression methods have ‘span’ and splines  
697 have ‘degrees of freedom,’ which are parameters that control the degree of smoothing.

698 The main result of smoothing with splines is a reduction or even removal of what is believed to be noise  
699 in the data. The slope at each point can be computed directly from the smoothing spline, which after all  
700 is an explicit function. This step of slope determination offers two options: it allows us to estimate slopes  
701 only for the measured data points or to sample the smoothing function for any number of other points,  
702 which yields a larger set of numerical values for variables and slopes (Voit & Almeida, 2004).

703 If we select many points from the smoothing spline, we overcome the problem of data scarcity that is  
704 inherent in many datasets. In fact, sampling from the smoothing spline allows the subsequent parameter  
705 inference method to access a larger amount of information and thereby to mitigate noise amplification.

706

### 707 **1.2.2. Conversion of ODEs into systems of algebraic equations**

708 If data are available as time series, it is mathematically feasible and beneficial to estimate slopes (for  
709 instance, from smoothing splines) and to convert the inference problem from one based on ODEs into one  
710 exclusively using algebraic functions (Voit & Savageau, 1982a, 1982b; Varah, 1982; Torres & Voit, 2002;  
711 Voit et al., 2005).

712 Suppose the growth and interaction parameters of an LV system are to be estimated from time series  
713 data of the dependent variables  $X_i$ . The smoothing of these data facilitates the estimation of slopes  $S_k(X_i)$   
714 of all variables at a set of time points  $t_k$ ,  $k = 1, \dots, K$ . These time points may or may not correspond to the  
715 measured data. In fact, the smoothing permits the computation of slopes at arbitrarily many time points  
716 within the observation interval. However many slopes are computed, they correspond to derivatives of  
717 the spline of  $X_i$  at the given time points. Substituting numerical values of all variables and slopes from the  
718 smoothing splines into Eq. (1) yields a system of  $n \times K$  linear algebraic equations containing all system  
719 parameters:

720 
$$S_{i,t} = a_i X_{i,t} + \sum_{j=1}^n b_{ij} X_{i,t} X_{j,t}, \quad i = 1, \dots, n \quad [ S2 ]$$

721 If environmental inputs  $\gamma_i X_{i,t} U_t$  are to be considered as well, they are added to the equations and either  
722 substituted with numerical values, if known, or estimated with the parameters  $a_i$  and  $b_{ij}$ .

723 A caveat of this conversion of ODEs into algebraic equation is a possible time warp (see end of chapter 5  
724 of (Voit, 2017)). The reason is that time is explicitly eliminated from the procedure. Nonetheless, the  
725 estimates usually provide good results, or at least good initial guesses for other optimization approaches  
726 such as traditional gradient methods.

727 Suppose the dependent variables are not zero within the dataset obtained from smoothing. If so, we can  
728 divide both sides of the  $K$  equations for  $X_i$  in expression [ S2 ] by the value of the dependent variable at  
729 the appropriate time point. This step is not mandatory but linearizes the equations. The case of variables  
730 with values of zero is typically not very interesting or can be handled by eliminating the variable or parts  
731 of the time series.

732

### 733 **1.2.3. Parameter inference**

734 Once all differentials are replaced with estimated slopes, the inference of parameter values from LV-  
735 models offers two options: because the system of algebraic equations is linear, we may optimize its  
736 parameter values through simple multivariate linear regression (ALVI-LR), where we may use data points  
737 or iterate the regression with subsets of points, which naturally leads to an ensemble of well-fitting  
738 models.

739 An interesting alternative is to use just  $n+1$  of the data points and slopes, if  $n$  is the number of variables,  
740 which results in a system of linear equations that can be solved with simple algebraic methods (ALVI-MI).



741 Choosing different data points naturally creates ensembles of solutions. These can be further analyzed,  
742 for instance, with respect to model robustness and identifiability. They can also be used to determine to  
743 what degree the LV format is adequate for the available data (Voit et al., 2021).

744

#### 745 **1.2.4. Example of parameter estimation with ALVI**

746 To explain the parameter estimation procedure with ALVI, we use the sparse noisy dataset presented in  
747 *Supplements* Section 2 and also in Table S1.2. First, we smooth the data with a spline or LOESS. For this  
748 example, we use 5, 8, 11 and 5DF-splines for  $X_1$ ,  $X_2$ ,  $X_3$  and  $X_4$  respectively and compute the first derivative  
749 of the splines to estimate the slopes. At this point we discard the data and only use the spline values. We  
750 may use the original data, especially if we think they characterize the studied phenomenon well, but using  
751 the spline usually produces better results in the case of noisy data.

752 As an example, consider the first differential equation and the first datapoint, at  $t = 0$ :

$$753 \quad \frac{dX_1}{dt}(0) = a_1X_1(0) + b_{11}X_1(0)X_1(0) + b_{12}X_1(0)X_2(0) + b_{13}X_1(0)X_3(0) + b_{14}X_1(0)X_4(0)$$

754 We substitute numerical values for the slope and for all variables on the system equations,

| time | Slope_ $X_1$ | $X_1$ | $X_2$ | $X_3$ | $X_4$  |
|------|--------------|-------|-------|-------|--------|
| 0    | 0.0353       | 1.229 | 0.492 | 1.787 | 0.0367 |

755

756 which yields

$$757 \quad 0.0353 = a_1 \times (1.229) + b_{11} \times (1.229)^2 + b_{12} \times (1.229) \times (0.492)$$
$$758 \quad \quad \quad + b_{13} \times (1.229) \times (1.787) + b_{14} \times (1.229) \times (0.0367).$$

759

760 We may divide the equation by the numerical value of the dependent variable, but this step is not  
761 mandatory.

762

763 
$$\frac{0.0353}{1.229} = a_1 + b_{11} \times (1.229) + b_{12} \times (0.492) + b_{13} \times (1.787) + b_{14} \times (0.0367)$$

764

765 The same steps are performed for every equation and every chosen time point. The result is a system of  
766 linear equations with as many equations as chosen time points; each equation has  $n+1$  unknown  
767 parameters, where  $n$  corresponds to the number of dependent variables.

768 Now we have two options: We may use linear regression (ALVI-LR) or matrix inversion (ALVI-MI). ALVI-LR  
769 uses every equation and every chosen time point and performs linear regression to produce estimates for  
770 the parameters. For the alternative, ALVI-MI, we choose a sample of data points that, when combined  
771 with the equations, generates a number of equations equal to the number of parameters to be estimated.  
772 If these equations are linearly independent, the system is solvable and the solution is unique, allowing us  
773 to obtain estimates for the parameters by simple matrix inversion.

774

### 775 **1.3. Multivariate Autoregressive (MAR) models**

776 Multivariate Autoregressive (MAR) models are discrete recursive models. Their format is shown in  
777 eqn. 2 and 3 of the main text and conveys that the state of the system at time  $t+1$  depends on the state  
778 at  $t$  and possibly on environmental or stochastic input. As an alternative to this modeling structure with  
779 “memory 1,” it is possible to extend MAR models to depend also on states farther in the past, such as  $X_t$   
780 <sub>1</sub>,  $X_{t-2}$ , and  $X_{t-3}$ , in addition to  $X_t$ . However, the commonly used models depend only on the immediately

781 prior state and are sometimes called MAR(1). Here, we only consider MAR(1) models and refer to them  
782 simply as MAR models.

783 MAR models can be interpreted in two distinct ways. In generic mathematical terms, MAR models are  
784 stochastic, linear approximations of nonlinear dynamic systems that evolve over time in the vicinity of a  
785 fixpoint (steady state). According to this interpretation (Holmes et al., 2013),  $X_t$  is a vector of the  
786 realization of random variables at time  $t$ . Noise captures natural variations in environmental conditions  
787 and is modeled by a multivariate normal distribution with mean zero and variance-covariance matrix  $\delta$ .  
788 If stochasticity is omitted, MAR models are quite similar to LV models close to the steady state (see  
789 *Supplements* Section 1.5).

790 One may also interpret MAR models in an ecological context, where they can be viewed as multispecies  
791 competition models with Gompertz density dependence and an instantaneous growth rate that decreases  
792 linearly over time as the population sizes increase (Ives, 1995; Certain, Barraquand, & Gårdmark, 2018).  
793 In this context,  $X_t$  is a vector of the log-abundances of dependent variables at time  $t$ .

794 MAR models may be augmented with state variables that simulate the observation process and these  
795 models are called Multivariate Autoregressive(1) State-Space (MARSS) (Holmes et al., 2012; Certain et al.,  
796 2018); we will not analyze these for the sake of simplicity. For the comparisons in this study, we are not  
797 considering the influence of environmental variables, so the  $\gamma u_t$  term will be omitted henceforth.

798 It is considered an advantage in ecology if models explicitly take the influence of environmental factors  
799 into account (for details, see (Certain et al., 2018) (Hytti et al., 2006)), which is the case for MAR. The  
800 availability of estimation software like MARSS (Holmes et al., 2012, 2020) has greatly increased the appeal  
801 of MAR models.

802

803 **1.4. MARSS**

804 MARSS is a software package for analyzing MAR models with or without log transformation of the  
805 dependent variables. Its use requires several steps.

806 1 – Specify key MARSS settings:

|                                   |                                                                                                  |
|-----------------------------------|--------------------------------------------------------------------------------------------------|
| <b>B</b> = "unconstrained"        | Matrix with all elements potentially different                                                   |
| <b>U</b> = "unequal"              | Vector with all elements potentially different                                                   |
| <b>Q</b> = "diagonal and unequal" | Matrix where all elements are zero except the main diagonal, where the elements have real values |
| <b>Z</b> = "identity"             | Identity matrix                                                                                  |
| <b>A</b> = "zero"                 | All elements zero                                                                                |
| <b>R</b> = "zero"                 | All elements zero                                                                                |
| <b>x0</b> =                       | Initial values of the time series                                                                |

807

808 **A** and **R** correspond to the “observation variables,” which simulate the observation process of the system  
809 variables. For our comparisons, these are set to zero because observation variables are not considered.

810 2 – In the MARSS function, the data must be formatted with variables in rows and observations in columns.  
811 If the data points are not equally distributed in time, they must be augmented by “NA” to force the interval  
812 between any two consecutive data entries to be of the same length. This is necessary to ensure the correct  
813 time structure of the data for the estimator.

814 3 – With this regularization, MARSS finds estimates for **B**, **U** and **Z**, that correspond to  $\alpha$ ,  $\beta$  and  $\delta$  in eqn 3  
815 of the main text.

816 If MARSS does not converge, it is advisable to increase the max number of iterations. This step solves the  
817 problem but is different from the suggestion offered by Holmes and colleagues, namely, that the model  
818 assumptions should be checked (see p. 57 in (Holmes et al., 2020)).

819 Our setup is exactly equal to that used by Holmes *et al.* (Holmes et al., 2012, 2020) for the Isle Royale  
820 dataset, which the authors used to exemplify the inference of species interaction parameters with and  
821 without covariates. Some of the illustration examples were modeled differently in the literature but for  
822 purpose of comparisons with LV models, this model structure was used. For example, the ‘gray whales’  
823 dataset was modeled by Holmes and colleagues with  $\beta$ , the species interaction matrix, set to zero,  
824 whereas  $\mathbf{R}$ , the matrix that captures the noise from the observational process, was estimated from the  
825 data. Because we are interested in the interactions between species, we do not focus on observational  
826 noise, and Holmes’ original setup was replaced with the one discussed above.

827

### 828 **1.5. Structural Similarities between Modeling Formats**

829 The two modeling formats appear to be very different mathematically. Nonetheless, they can be compared in terms  
830 of their mathematical representations and also with respect to practical considerations. These comparisons  
831 demonstrate that the two models can actually behave quite similarly if the community of populations operates  
832 relatively close to a stable steady state. By contrast, if this assumption is violated, the two models often show  
833 strongly diverging results, as the linearity of the MAR model can deviate considerably from the nonlinearities of the  
834 LV model.

835 Purely considered on mathematical grounds, MAR is defined recursively in eqn 2 and 3 of the main text. By omitting  
836 environmental variables, we directly obtain

$$837 \quad X_{i,t+1} = \alpha_i + \sum_{j=1}^n \beta_{ij} X_{j,t} + w_{i,t}; \quad i = 1, 2, \dots, n; \quad w_{i,n} \sim N(0, \delta_i), \quad [S3]$$

838 which can be interpreted as a multispecies competition model with Gompertz density dependence, if the  
839 dependent variables represent logarithmic abundancies (Certain et al., 2018).

840 Suppose that the MAR model indeed uses log-abundances. To explain similarities between the MAR and LV  
 841 formats, we rewrite this multispecies log-abundance model equivalently in Cartesian form, which yields the  
 842 following:

843 For  $i = 1, 2, \dots, n$ ;  $w_{i,n} \sim N(0, d_i)$ :

$$\begin{aligned} \ln(X_{i,t+1}) &= \alpha_i + \sum_{j=1}^n \beta_{ij} \ln(X_{j,t}) + w_{i,n} \\ \Leftrightarrow X_{i,t+1} &= e^{(\alpha_i + \sum_{j=1}^n \beta_{ij} \ln(X_{j,t}) + w_{i,n})} \\ \Leftrightarrow X_{i,t+1} &= e^{\alpha_i} e^{\left(\sum_{j=1}^n \ln((X_{j,t})^{\beta_{ij}})\right)} e^{w_{i,n}} \\ \Leftrightarrow X_{i,t+1} &= e^{\alpha_i} \prod_{j=1}^n e^{\left(\ln((X_{j,t})^{\beta_{ij}})\right)} e^{w_{i,n}} \\ \Leftrightarrow X_{i,t+1} &= e^{\alpha_i} \prod_{j=1}^n (X_{j,t})^{\beta_{ij}} e^{w_{i,n}} \quad [S4] \end{aligned}$$

844

845 In this form, MAR is similar to a discrete multivariate power-law function.

846 The similarity of this result to the LV model can be seen if we use Euler's method for determining the numerical  
 847 solution. Euler's method is an approximation of more sophisticated methods and its simplicity makes it preferable  
 848 for the comparisons between time series and ODEs.

849 Formulating the typical Euler step for the LV model transforms the ODE into a series of discrete steps of the type

$$850 \quad X_{i,t+h} = X_{i,t} + h * \left. \frac{dX_i}{dt} \right|_{X_i=X_{i,t}} = X_{i,t} + h * X_{i,t} (a_i + \sum_{j=1}^n b_{ij} X_{j,t}), \quad i = 1, 2, \dots, n, \quad [S5]$$

851 where  $h$  is the step size of Euler's method and  $dX_i/dt$  is the left-hand side of the differential equations in eqn 1,  
 852 evaluated at time  $t$ .

853 A comparison of eqn [ S4 ] and [ S5 ] suggests that the MAR and LV models seem to be very different. Whereas the  
 854 LV model captures nonlinear dynamic behaviors without variable transformations, the MAR model uses linearity in

855 log space. Nonetheless, there are similarities between the two formats. To see these, we compare eqn [ S3 ] and [   
 856 S5 ] instead of [ S4 ] and [ S5 ].

857 Furthermore, we suppose that the dynamics is near the steady state of the differential equations, so that  $X_{i,t+1} - X_{i,t}$    
 858  $\approx 0$  for any given  $t$ . Using this approximate equality in eqn [ S3 ], we obtain

859

$$860 \quad X_{i,t+1} - X_{i,t} \approx 0$$

$$861 \quad \Leftrightarrow \alpha_i + \sum_{j=1}^n \beta_{ij} X_{j,t} + w_{i,t} - X_{i,t} \approx 0; i = 1, 2, \dots, n; w_{i,n} \sim N(0, \delta_i). \quad [ S6 ]$$

862

863 Using this approximate equality in format [ S5 ] for LV yields, for  $i = 1, 2, \dots, n$ :

$$X_{i,t+h} - X_{i,t} \approx 0$$

$$\Leftrightarrow X_{i,t} + h * X_{i,t} \left( \alpha_i + \sum_{j=1}^n b_{ij} X_{j,t} \right) - X_{i,t} \approx 0$$

$$\Leftrightarrow \alpha_i + \sum_{j=1}^n b_{ij} X_{j,t} \approx 0$$

$$\Leftrightarrow \alpha_i + \sum_{j=1}^n \tilde{b}_{ij} X_{j,t} - X_{i,t} \approx 0 \quad [ S7 ]$$

864 Here  $\tilde{b}_{ij}$  equals  $b_{ij}$  for all  $i \neq j$  and  $b_{ij} + 1$  for  $i = j$ .

865 If we disregard the Gaussian noise,  $w_{ij}$ , in the MAR model, the two sets of near-steady-state eqn [ S6 ] and   
 866 [ S7 ] are the same. They are both linear, although the dynamic LV model itself is non-linear. Thus, if  $\alpha_i =$    
 867  $a_i$ ,  $\beta_{ij} = b_{ij}$  for all  $i \neq j$  and  $\beta_{ij} = b_{ij} + 1$  for  $i = j$ , the MAR and LV models are mathematically equivalent   
 868 at the steady state and similar close to it. As long as the nonlinearity are close to linear or close to power-   
 869 law functions, MAR without or with log-transformation, respectively, may be expected to lead to   
 870 acceptable fits.

871

## 872 **2. Case study 1: Synthetic LV data**

873 As a representative example, we use the four-variable LV system

$$874 \quad \frac{dX_{i,t}}{dt} = a_i X_{i,t} + b_{i1} X_{i,t} X_{1,t} + b_{i2} X_{i,t} X_{2,t} + b_{i3} X_{i,t} X_{3,t} + b_{i4} X_{i,t} X_{4,t}, \quad i = 1, \dots, 4 \quad [S8]$$

875 The parameters are presented in Figure S1. For a first analysis, we use this system to create one set of  
876 synthetic time courses, consisting of 100 time points, which is presented in Table S1. The dynamics is  
877 shown in Figures 1 and S1 as circles.

878 If we use these noise-free data, the inferences are close to perfect with respect to the trajectories and  
879 parameter values (Figure S9).

880 To mimic a more realistic scenario, we created a noisy dataset, visualized in Figure S1a, which was  
881 constructed by randomly choosing forty of the one hundred original datapoints obtained from the  
882 synthetic system and adding to the chosen points a normal random variable with mean 0 and a standard  
883 deviation of 20% of the mean of each variable. This *noisy dataset* is shown in Table S1.2.

884 A second realistic dataset (Figure S1b) was constructed by first choosing eleven points from the data that  
885 characterize the dynamic (including extremes values). Next, each of the chosen points was multiplied by  
886 a random normal variable with mean 1 and standard deviation of 0.2. This process was iterated to create  
887 five replicates per chosen point. This *replicate dataset* is shown in Table S1.3.

888 Variable  $X_4$  was designed as a (decoupled) logistic function. It is unaffected by the other variables and  
889 does not affect them either. It was included to explore to what degree the methods to be tested can  
890 detect this detachment.



891 The smoothing and slope estimation steps followed directly the procedures described in *Supplements*  
892 Section 1.2. The first derivative of the smoothing function was used for estimates for the slopes.

893 To infer numerical values for the parameters of a given equation, we have the choice between linear  
894 regression (ALVI-LR) and algebraic matrix inversion (ALVI-MI). For ALVI-MI, we choose points from the  
895 sample and use the corresponding slope estimates to create a system of equations with the same number  
896 of equations and unknowns. As we have 4 variables and 20 parameters, we need 20 independent  
897 equations and thus 5 time points. For each time point we obtain the value for each of the 4 dependent  
898 variables and use these to populate the equations.

899 As an illustration for the noisy dataset, we choose 5, 8, 11 and 5DF-splines and time points  $t = 8, 13, 17,$   
900 19 and 79 for the noisy dataset. For the replicate dataset, we use 5, 6, 8 and 8DF-splines, and the ALVI-MI  
901 solution was calculated with spline points at times 11, 18, 26, 33 and 60. The time point selection for the  
902 ALVI-MI solution can be automated using a random or exhaustive search of the possibilities.

903 The noisy dataset (Figures 1a, S1a, S3a and S4a) is representative of a study where each time point sample  
904 corresponds to a single observation taken when it is possible or convenient. By contrast, the replicate  
905 dataset (Figures 1b, S1b, S3b and S4b) simulates a series of experimental replicates where the  
906 observations were conducted multiple times, but at fewer time points, which the researchers suspect  
907 would contain valuable information.

908 As an illustration of how the smoothing techniques work, we used splines and LOESS with different  
909 degrees of smoothing. The results for variable  $X_1$  are shown in Figure S2. Choosing the optimal degree of  
910 smoothing is not a trivial matter. Too much smoothing ignores important details in the variable dynamics,  
911 while too little incorporates noise. In the programming language R, the function “loess.as” allows the  
912 calculation of the optimum value for the spam, which controls the smoothing. The user still must decide

913 the degree of the polynomials to be used and choose from two criteria for automatic smoothing  
914 parameter selection: a bias-corrected Akaike information criterion (AICC) and generalized cross-validation  
915 (GCV). This choice is not always leading to the optimal solution, but it should be used to challenge our  
916 assumptions.

917 Figure S3 presents the same treatment as presented in Figure 1 but for datasets with 5% noise. It is clear  
918 and not surprising that the models produce better quality fits when the signal-to-noise ratio is higher.

919

### 920 **2.1.1. Application of ALVI to synthetic data**

921 An alternative to using the algebraic parameter inference method with matrix inversion (ALVI-MI) is the  
922 linear regression method (ALVI-LR); fits for 20% noise are shown in Figure S4. As in ALVI-MI, the parameter  
923 values are close to the true values and the fit is acceptable. However, the dynamics of the system is slightly  
924 different. One reason is that the dynamic solutions are sometimes quite sensitive to the chosen initial  
925 values. As a remedy, it is often beneficial to initiate the solution somewhere inside the overall time  
926 interval, typically close to the midpoints of the variable ranges, and solve forward and backward.

927 ALVI also works for more complicated dynamics, as can be seen in Figure S5. Here we are interested in  
928 finding out if the methods can recover the dynamics, which in some cases turns out to be challenging for  
929 sparse data even without the introduction of noise. Thus, we used the synthetic data unaltered.  
930 Specifically, data for early time points ( $t = [1, 100]$ ) were fitted and then extrapolated for a total time  
931 horizon of ( $t = [1, 500]$ ). In these examples, ALVI-MI is used with 100DF-splines. It uses data samples with  
932 points corresponding to timepoints  $t = 5, 10, 20, 30$  and  $50$  for all cases except for the chaotic oscillations  
933 where we used  $t = 4, 6, 10, 15$  and  $35$ . For each case, we also present the MAR estimates. Of course, one  
934 must recall that the original data were produced with LV models. While the MAR model extrapolations

935 are not always satisfactory, it is nevertheless comforting that the inference method returns good results  
936 for the time interval used for data fitting.

937 ALVI-MI generally performed very well but did not adequately capture the deterministic chaos (chaos 1). For this  
938 case only, we obtained a better fit using ALVI-LR, which may not be surprising given the extremely sensitive nature  
939 of chaotic systems to noise. Apart from this situation, results with ALVI-LR are very similar to ALVI-MI results and will  
940 not be displayed.

941 In Figure S5b, the MAR model performed well when log-abundances were used. In the remaining cases, it failed to  
942 replicate the oscillations or these exploded by reaching amplitudes far bigger than in the dataset. One also notes  
943 early discrepancies between the initial points used to create the estimates and the MAR estimates.

944

945 **3. Supplemental Figures**

946 **Figure S1**

|          | Initial Conditions    |
|----------|-----------------------|
| $X_1$    | 1.2                   |
| $X_2$    | 0.3                   |
| $X_3$    | 2                     |
| $X_4$    | 0.001                 |
|          | True Parameter Values |
| $a_1$    | 0.044                 |
| $b_{11}$ | -0.08                 |
| $b_{12}$ | 0.02                  |
| $b_{13}$ | 0.08                  |
| $b_{14}$ | 0                     |
| $a_2$    | 0.216                 |
| $b_{21}$ | -0.04                 |
| $b_{22}$ | -0.08                 |
| $b_{23}$ | 0.04                  |
| $b_{24}$ | 0                     |
| $a_3$    | 0.116                 |
| $b_{31}$ | -0.16                 |
| $b_{32}$ | 0.16                  |
| $b_{33}$ | -0.08                 |
| $b_{34}$ | 0                     |
| $a_4$    | 0.2                   |
| $b_{41}$ | 0                     |
| $b_{42}$ | 0                     |
| $b_{43}$ | 0                     |
| $b_{44}$ | -0.1                  |

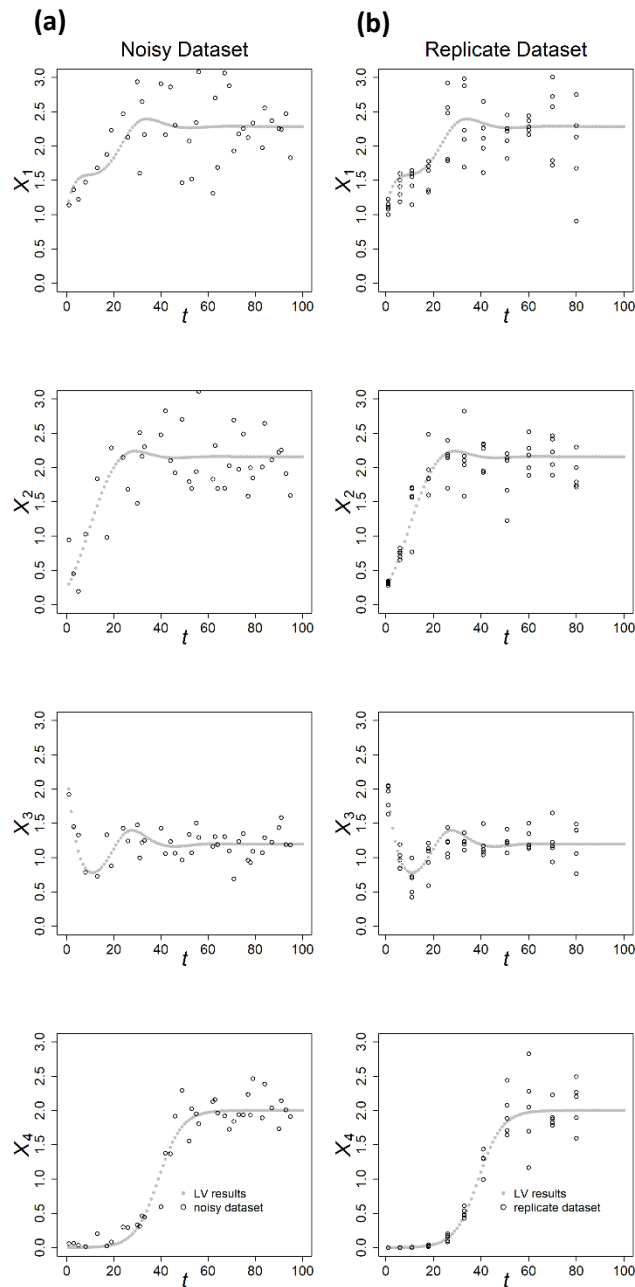

947 **Figure S1: Time courses with superimposed noise.** Initial conditions and parameter values for the  
 948 synthetic LV example in equation S8 with four dependent variables. **Column a:** Noisy dataset – Based on  
 949 40 points from the synthetic data with added random normal noise with mean 0 and standard deviation  
 950 equal to 20% of each variable mean. **Column b:** Replicate dataset – 11 points were chosen from the  
 951 synthetic data and at each point five “observations” were created by multiplying the value of the variable  
 952 by a random normal value of mean 1 and standard deviation of 0.2.

953  
 954

955 **Figure S2**

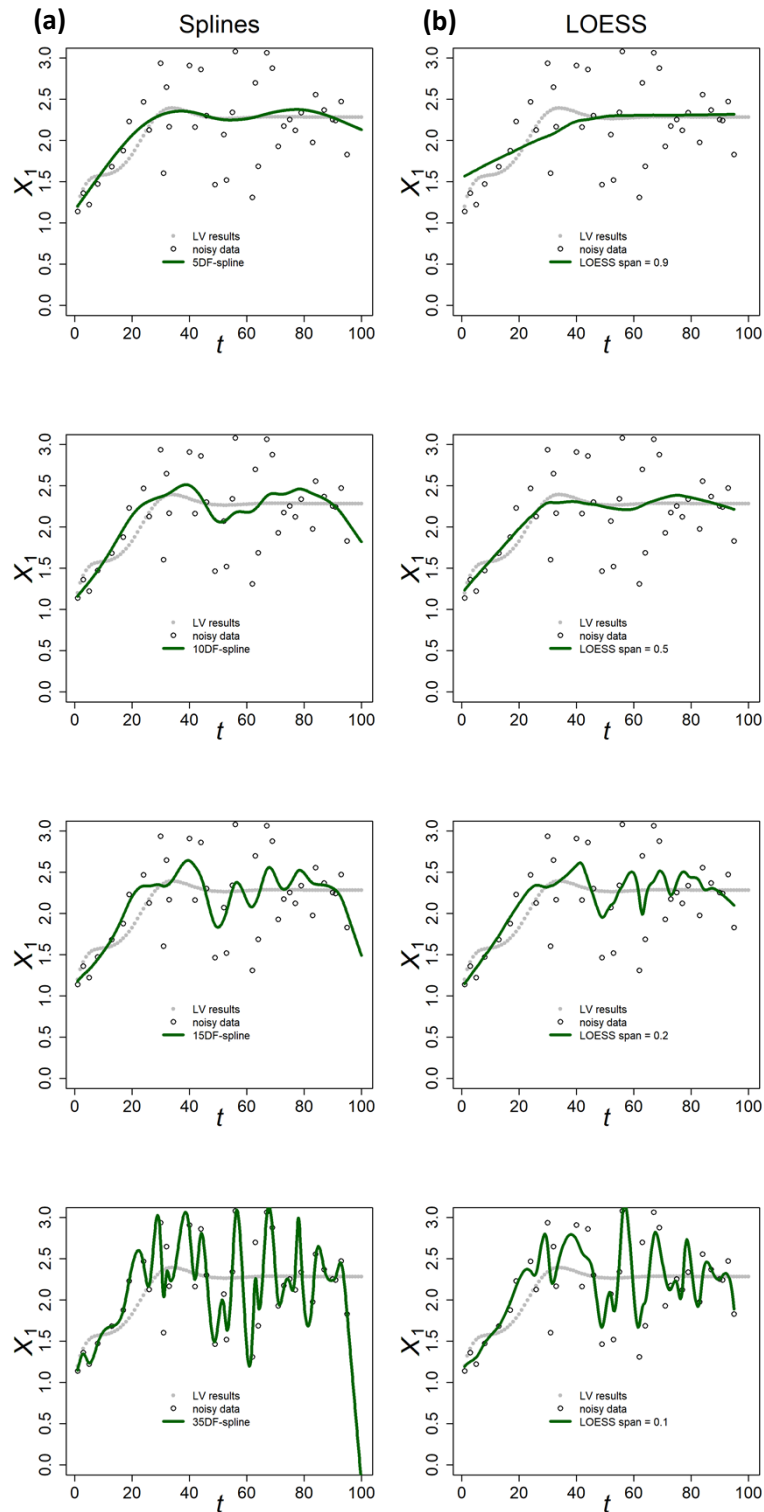

956  
957 **Figure S2: Smoothing noisy variable  $X_1$ .** Column a: Splines with different degrees of freedom. Column b:  
958 LOESS with different span levels.

959 **Figure S3**

|       | Initial Conditions | Noisy Data | Replicate Data |
|-------|--------------------|------------|----------------|
| $X_1$ | 1.2                | 1.25117    | 1.17824        |
| $X_2$ | 0.3                | 0.25825    | 0.30397        |
| $X_3$ | 2                  | 1.69737    | 1.97235        |
| $X_4$ | 0.001              | 0.02083    | 0.00104        |

  

|          | True Parameter Values | Noisy Data | Replicate Data |
|----------|-----------------------|------------|----------------|
| $a_1$    | 0.044                 | 0.07373    | 0.03593        |
| $b_{11}$ | -0.08                 | -0.09759   | -0.06540       |
| $b_{12}$ | 0.02                  | 0.02780    | 0.01935        |
| $b_{13}$ | 0.08                  | 0.07649    | 0.06434        |
| $b_{14}$ | 0                     | -0.00149   | -0.00401       |
| $a_1$    | 0.216                 | 0.24020    | 0.21072        |
| $b_{11}$ | -0.04                 | 0.00429    | -0.00647       |
| $b_{12}$ | -0.08                 | -0.08501   | -0.09561       |
| $b_{13}$ | 0.04                  | -0.04856   | 0.01263        |
| $b_{14}$ | 0                     | -0.00323   | -0.00423       |
| $a_2$    | 0.116                 | 0.10463    | 0.07192        |
| $b_{21}$ | -0.16                 | -0.13316   | -0.16077       |
| $b_{22}$ | 0.16                  | 0.12651    | 0.16478        |
| $b_{23}$ | -0.08                 | -0.05638   | -0.05221       |
| $b_{24}$ | 0                     | -0.00441   | 0.00187        |
| $a_4$    | 0.2                   | 0.48906    | 0.19237        |
| $b_{41}$ | 0                     | -0.79105   | -0.00824       |
| $b_{42}$ | 0                     | 0.91565    | 0.00687        |
| $b_{43}$ | 0                     | -0.30302   | 0.01005        |
| $b_{44}$ | -0.1                  | -0.15627   | -0.09992       |

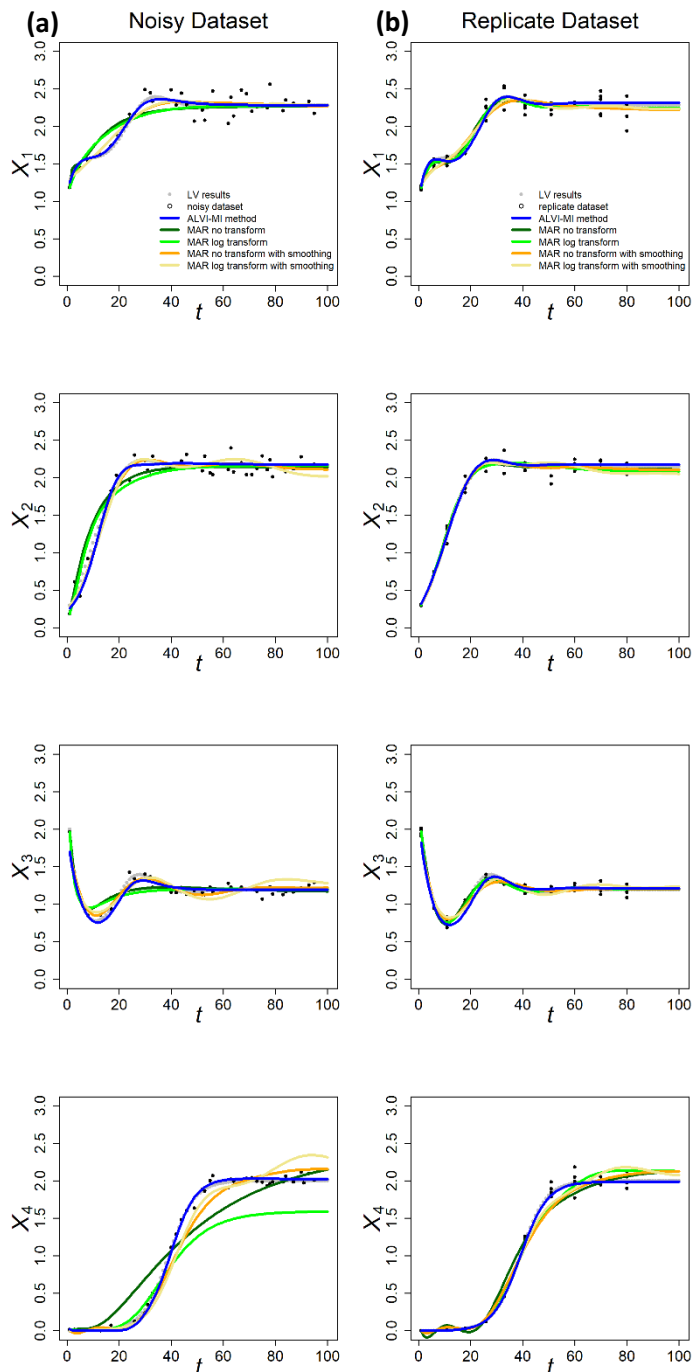

960 **Figure S3: Results of ALVI-MI and MAR applied to the noisy and replicate datasets with 5% of noise.**  
 961 **Column a:** Noisy dataset. All variables were smoothed with 11DF-splines and the ALVI-MI solution was  
 962 calculated with spline points at time points 8, 17, 30, 42 and 62. **Column b:** Replicate dataset. All variables  
 963 were smoothed with an 8DF-spline and the ALVI-MI solution was calculated with spline points  
 964 corresponding to time 6, 18, 26, 33 and 60. MAR estimates are presented in Tables S2.1 and S2.2.

965 **Figure S4**

|       | Initial Conditions | Noisy Data | Replicate Data |
|-------|--------------------|------------|----------------|
| $X_1$ | 1.2                | 1.19177    | 1.13704        |
| $X_2$ | 0.3                | 0.54552    | 0.33033        |
| $X_3$ | 2                  | 1.78728    | 1.75958        |
| $X_4$ | 0.001              | 0.05701    | 0.00116        |

  

|          | True Parameter Values | Noisy Data | Replicate Data |
|----------|-----------------------|------------|----------------|
| $a_1$    | 0.044                 | 0.05445    | 0.02433        |
| $b_{11}$ | -0.08                 | 0.00671    | -0.00738       |
| $b_{12}$ | 0.02                  | -0.02130   | -0.00173       |
| $b_{13}$ | 0.08                  | -0.01411   | 0.01168        |
| $b_{14}$ | 0                     | -0.00481   | -0.01293       |
| $a_1$    | 0.216                 | 0.23293    | 0.21887        |
| $b_{11}$ | -0.04                 | 0.00027    | 0.04438        |
| $b_{12}$ | -0.08                 | -0.01935   | -0.11968       |
| $b_{13}$ | 0.04                  | -0.14178   | -0.04491       |
| $b_{14}$ | 0                     | -0.01553   | -0.00930       |
| $a_2$    | 0.116                 | 0.01081    | -0.04261       |
| $b_{21}$ | -0.16                 | 0.00380    | -0.07696       |
| $b_{22}$ | 0.16                  | 0.04570    | 0.11963        |
| $b_{23}$ | -0.08                 | -0.08669   | -0.02739       |
| $b_{24}$ | 0                     | -0.00586   | -0.00146       |
| $a_4$    | 0.2                   | 0.08891    | 0.16518        |
| $b_{41}$ | 0                     | -0.02791   | -0.02964       |
| $b_{42}$ | 0                     | 0.11969    | 0.02948        |
| $b_{43}$ | 0                     | -0.11663   | 0.03522        |
| $b_{44}$ | -0.1                  | -0.06679   | -0.10181       |

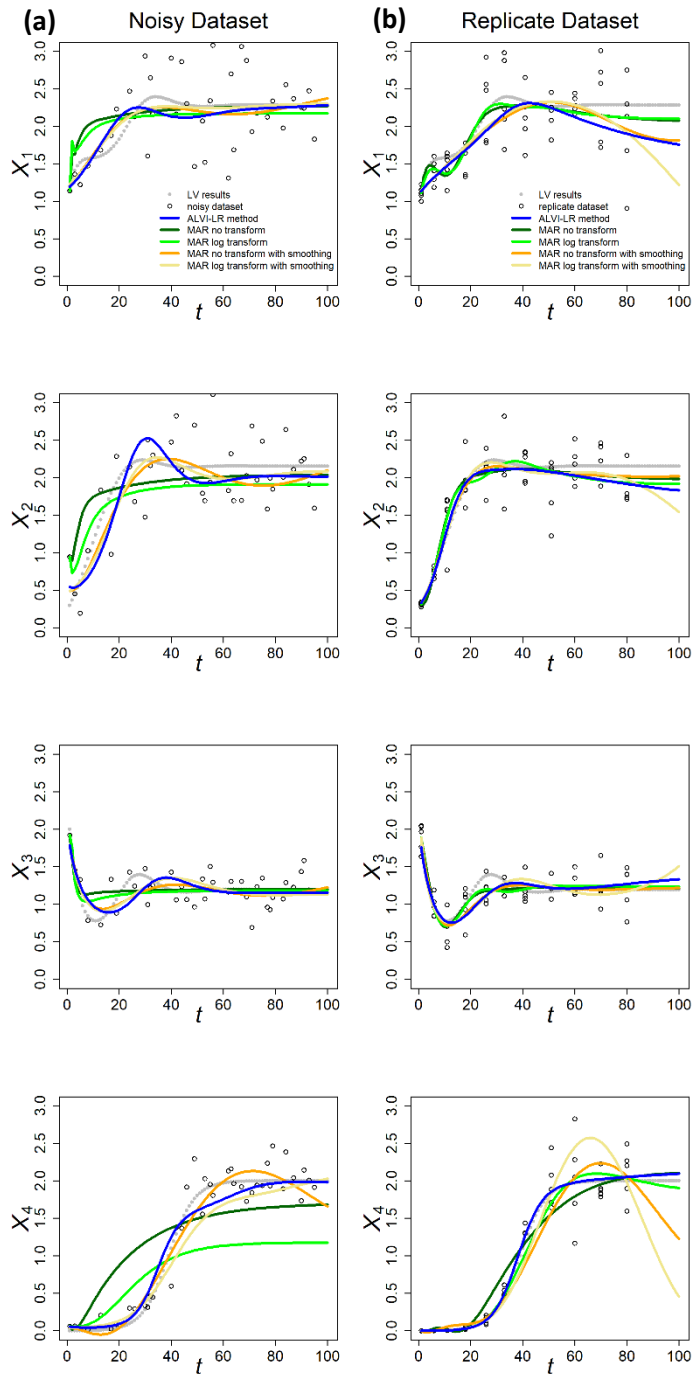

966

967 **Figure S4: Results of ALVI-LR and MAR applied to the noisy and replicate datasets. Column a:** Noisy  
 968 dataset. Time courses of  $X_1$ ,  $X_2$ ,  $X_3$  and  $X_4$  were smoothed with 6, 11, 11 and 11DF-splines respectively.  
 969 **Column b:** Replicate dataset. All variables were smoothed with 8DF-splines. MAR estimates are the same  
 970 presented in Figure 1.

971 **Figure S5**

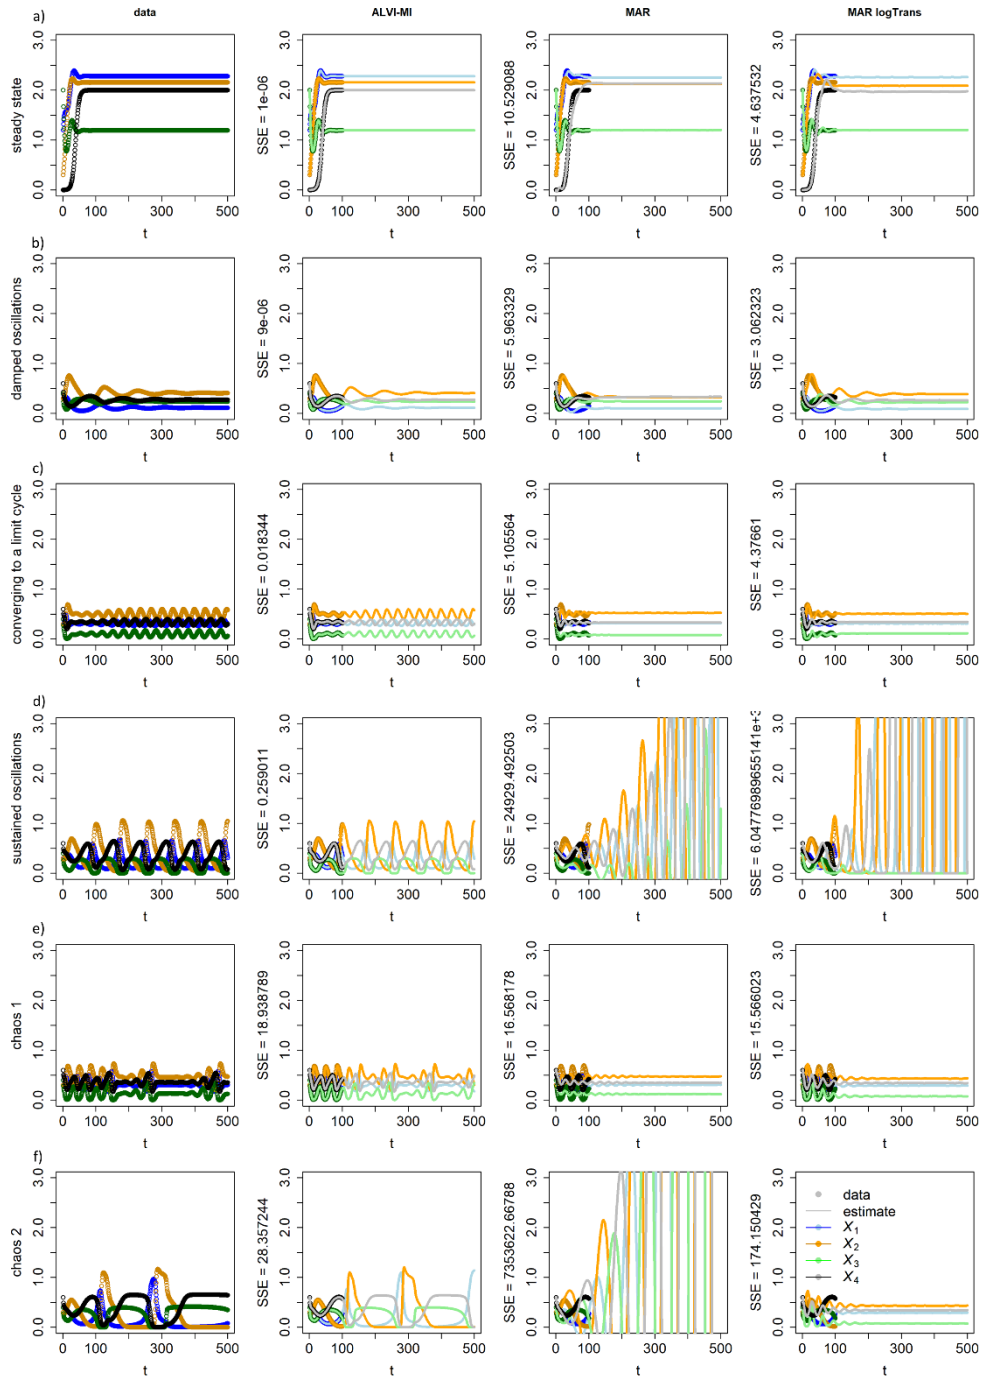

972

973

974

975 **Figure S5 – Data and results of inferences with ALVI-MI and MAR methods for LV systems with different**

976 **dynamics. Row a:** Data converging to a stable steady state; **Row b:** Damped oscillations; **Row c:** Initially

977 erratic oscillations converging to a limit cycle; **Row d:** Sustained oscillations; **Row e:** Deterministic chaos,

978 example 1; **Row f:** Deterministic chaos, example 2. Data, ALVI-MI and MARSS estimates are presented in

979 Table S3. The SSEs concerning the differences between the data and estimates for  $t = [1, 500]$  are

980 presented as labels to the Y-axis. No smoothing preceded MAR because the data are noise free.



981 **Figure S6**

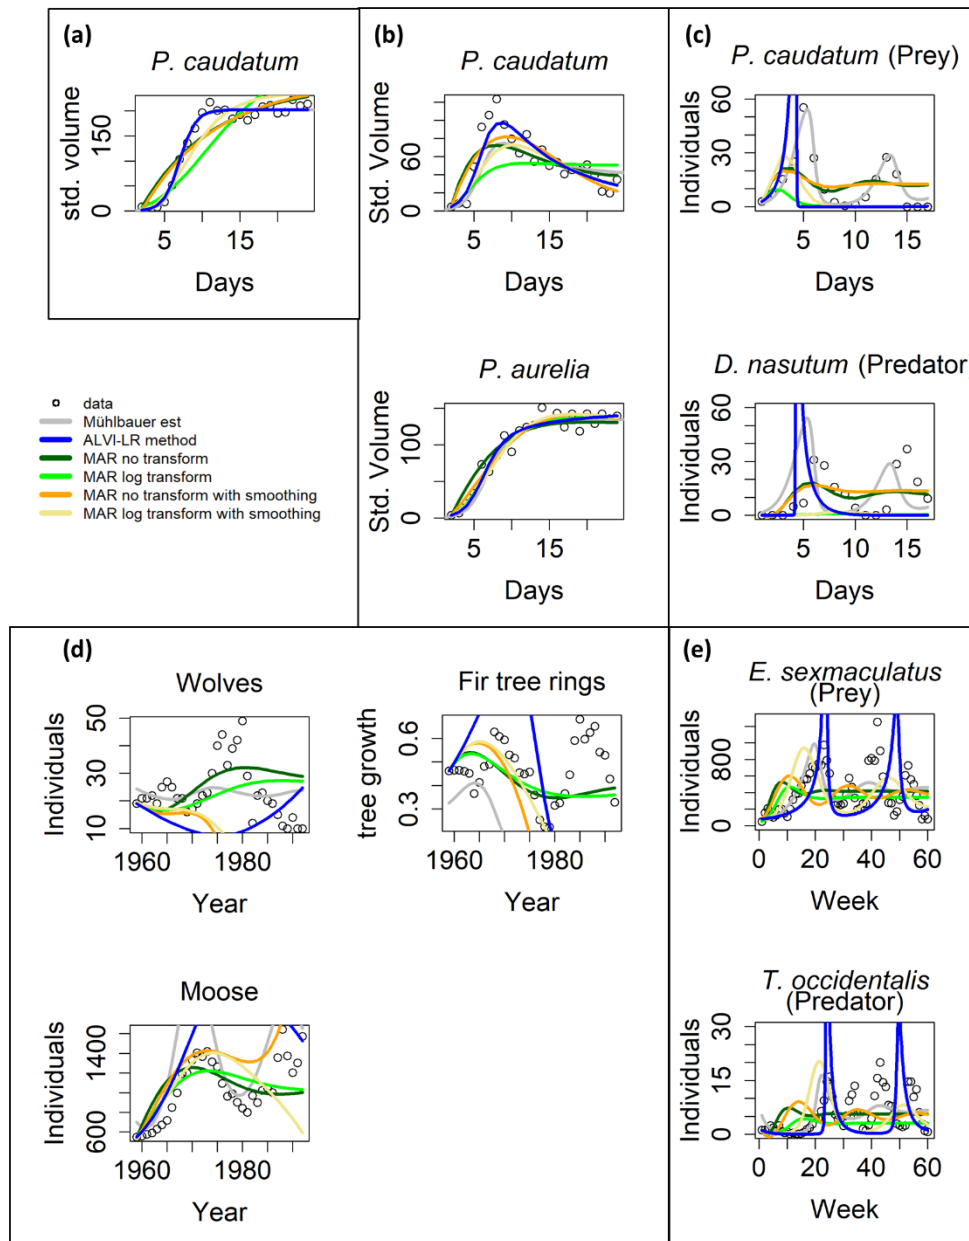

982 **Figure S6 – Examples of experimental data analyzed with ALVI-LR and MAR.** Black lines are estimates from  
 983 Mühlbauer *et al.* (Mühlbauer *et al.*, 2020). ALVI-LR estimates are represented as blue lines; corresponding parameter  
 984 values can be seen in Table S4.2. MAR estimates are presented in green, orange and yellow. Parameter estimates  
 985 are presented in Table S4.3. **a:** Standardized volume of *Paramecium caudatum* grown in monoculture (Gause, 1934).  
 986 **b:** Standardized volume of *Paramecium caudatum* and *Paramecium aurelia* grown in co-culture (Gause, 1934). **c:**  
 987 Predator-prey interactions between *Didinium nasutum* and *Paramecium caudatum* grown in mixture (Gause, 1934).  
 988 **d:** Multi-trophic dynamics for wolves, moose, and fir tree rings on Isle Royale from 1960 to 1994 (McLaren &  
 989 Peterson, 1994). **e:** Predator-prey interactions between *Eotetranychus sexmaculatus* and *Typhlodromus occidentalis*  
 990 in a spatially structured experiment (Huffaker, Shea, & Herman, 1963).  
 991

992

993

994 **Figure S7**

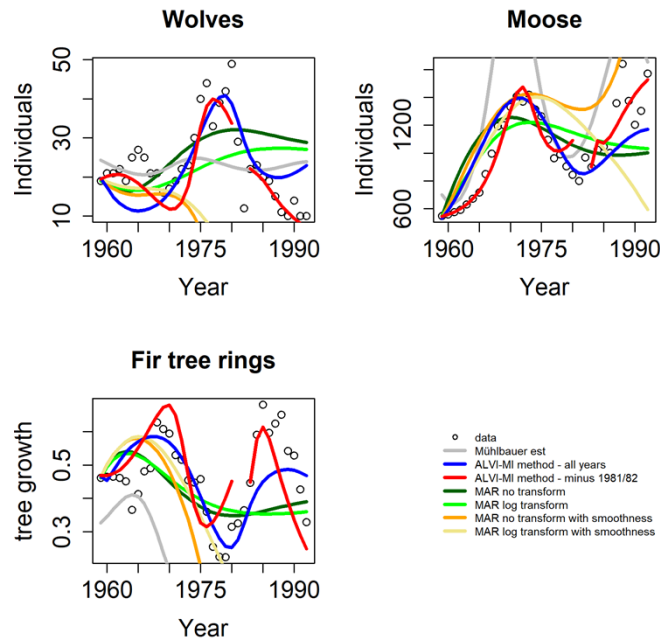

995

996 **Figure S7 - Multi-trophic dynamics for wolves, moose, and fir trees on Isle Royale from 1960 to 1994,**  
997 **from McLaren & Peterson (1994) (McLaren & Peterson, 1994).** This panel is very similar to Figure 2 d) but  
998 contains additional information. ALVI-MI estimates using all data are represented as blue lines. MAR  
999 estimates are presented in green, orange and yellow. Red lines correspond to the estimates using ALVI-  
1000 MI for two intervals, from 1959 to 1980 and from 1983 until the end of the series. This split was tested  
1001 because around 1980 the wolves were exposed to a disease that drastically reduced their numbers, an  
1002 event that dynamic models do not capture outside piecewise operation. MAR estimates are the same as  
1003 in Figure 3.

1004

1005 **Figure S8**

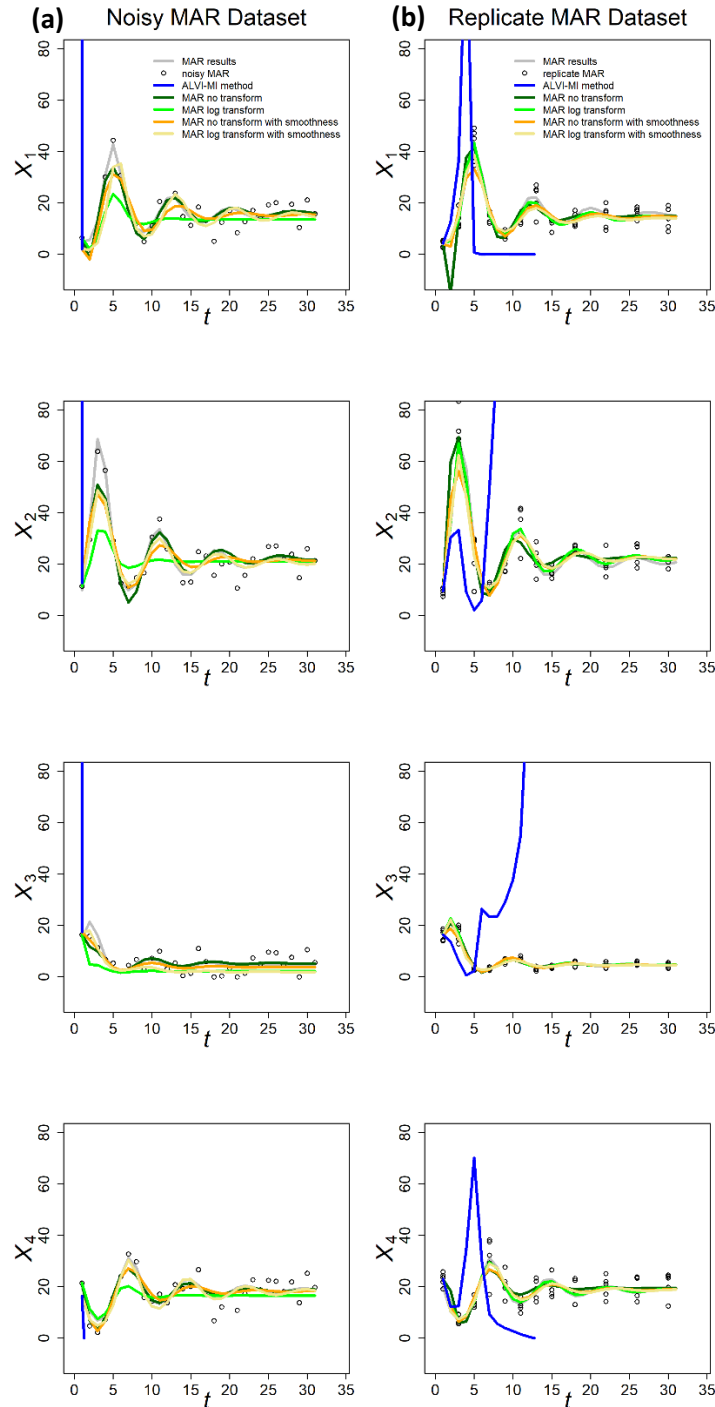

1006

1007 **Figure S8: ALVI-MI and MAR applied to an alternative sample of the same data presented in Figure 4, but with**  
1008 **slightly changed noise.** Although the differences in noise are visually almost undetectable, very different results for  
1009 the ALVI-MI fit are obtained if the same sample of spline points is used. However, if a new sample of spline points is  
1010 determined, the fits are almost indistinguishable (not shown). See Text for further explanations.

1011 **Figure S9**

|          | Initial Conditions    | ALVI-MI Estimates | ALVI-LR Estimates |
|----------|-----------------------|-------------------|-------------------|
| $X_1$    | 1.2                   | 1.2               | 1.2               |
| $X_2$    | 0.3                   | 0.3               | 0.3               |
| $X_3$    | 2                     | 2                 | 2                 |
| $X_4$    | 0.001                 | 0.001             | 0.001             |
|          | True Parameter values |                   |                   |
| $a_1$    | 0.044                 | 0.0440            | 0.0440            |
| $b_{11}$ | -0.08                 | -0.0800           | -0.0800           |
| $b_{12}$ | 0.02                  | 0.0200            | 0.0200            |
| $b_{13}$ | 0.08                  | 0.0800            | 0.0800            |
| $b_{14}$ | 0                     | 0.0000            | 0.0000            |
| $a_1$    | 0.216                 | 0.2160            | 0.2160            |
| $b_{11}$ | -0.04                 | -0.0400           | -0.0400           |
| $b_{12}$ | -0.08                 | -0.0800           | -0.0800           |
| $b_{13}$ | 0.04                  | 0.0400            | 0.0400            |
| $b_{14}$ | 0                     | 0.0000            | 0.0000            |
| $a_2$    | 0.116                 | 0.1161            | 0.1161            |
| $b_{21}$ | -0.16                 | -0.1602           | -0.1602           |
| $b_{22}$ | 0.16                  | 0.1601            | 0.1601            |
| $b_{23}$ | -0.08                 | -0.0799           | -0.0799           |
| $b_{24}$ | 0                     | 0.0000            | 0.0000            |
| $a_4$    | 0.2                   | 0.2000            | 0.2000            |
| $b_{41}$ | 0                     | -0.0003           | -0.0003           |
| $b_{42}$ | 0                     | 0.0001            | 0.0001            |
| $b_{43}$ | 0                     | 0.0003            | 0.0003            |
| $b_{44}$ | -0.1                  | -0.0999           | -0.0999           |

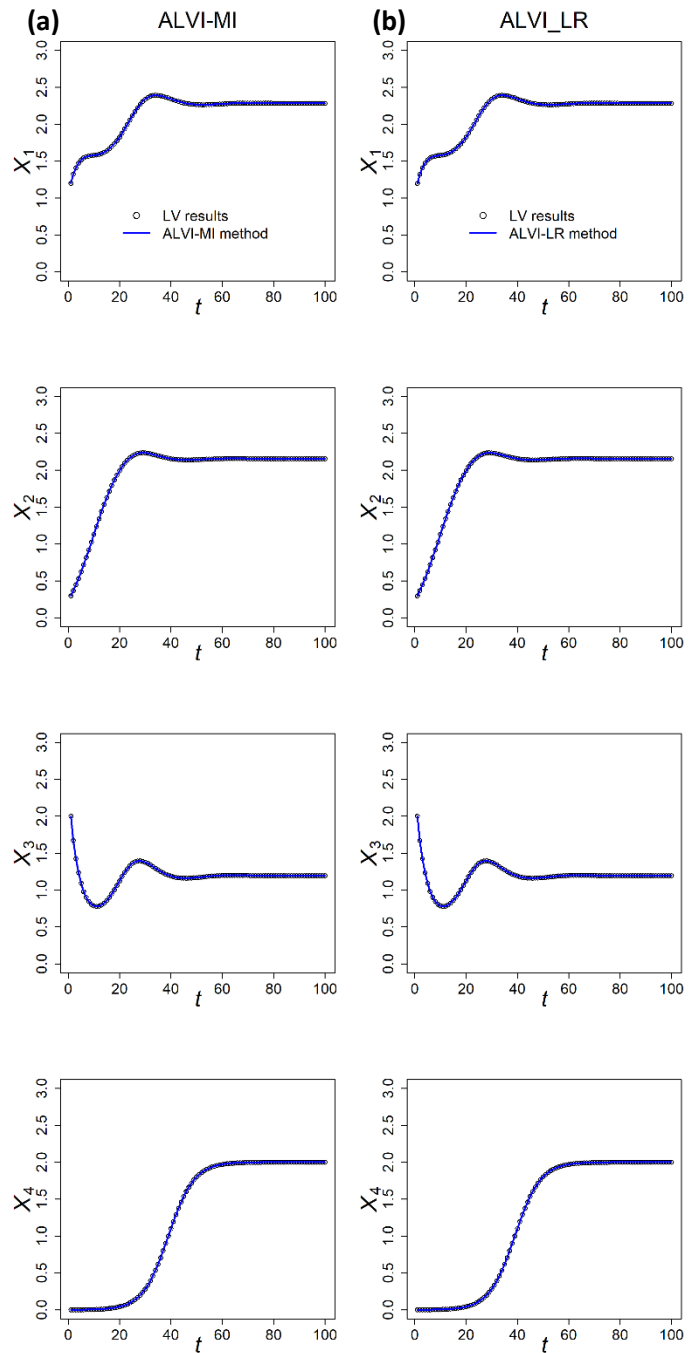

1012 **Figure S9: Estimates with alternative ALVI methods. Column a:** ALVI-MI and **Column b:** ALVI-LR with original  
 1013 synthetic LV data. The fits are of high quality (ALVI-MI SSE = 1.162229e-05 and ALVI-LR SSE = 3.289283e-07) and the  
 1014 parameter estimates are very close to the true parameters.

1015

1016 **4. Supplemental Tables**

1017

1018 **Table S1.1 – Synthetic LV data.** The data were generated with an LV system with four dependent  
1019 variables with parameter values presented in Figure S1.

| $t$ | $X_1$   | $X_2$   | $X_3$   | $X_4$   |
|-----|---------|---------|---------|---------|
| 0   | 1.20000 | 0.30000 | 2.00000 | 0.00100 |
| 1   | 1.32083 | 0.37078 | 1.67253 | 0.00122 |
| 2   | 1.41112 | 0.44848 | 1.42395 | 0.00149 |
| 3   | 1.47488 | 0.53265 | 1.23448 | 0.00182 |
| 4   | 1.51746 | 0.62275 | 1.09051 | 0.00222 |
| 5   | 1.54431 | 0.71810 | 0.98219 | 0.00272 |
| 6   | 1.56033 | 0.81785 | 0.90227 | 0.00332 |
| 7   | 1.56959 | 0.92096 | 0.84535 | 0.00405 |
| 8   | 1.57534 | 1.02621 | 0.80746 | 0.00494 |
| 9   | 1.58006 | 1.13229 | 0.78565 | 0.00603 |
| 10  | 1.58566 | 1.23781 | 0.77778 | 0.00737 |
| 11  | 1.59356 | 1.34144 | 0.78227 | 0.00899 |
| 12  | 1.60486 | 1.44195 | 0.79788 | 0.01097 |
| 13  | 1.62038 | 1.53828 | 0.82360 | 0.01338 |
| 14  | 1.64076 | 1.62958 | 0.85846 | 0.01632 |
| 15  | 1.66648 | 1.71521 | 0.90140 | 0.01990 |
| 16  | 1.69783 | 1.79474 | 0.95118 | 0.02425 |
| 17  | 1.73496 | 1.86789 | 1.00625 | 0.02954 |
| 18  | 1.77779 | 1.93449 | 1.06475 | 0.03596 |
| 19  | 1.82599 | 1.99445 | 1.12450 | 0.04375 |
| 20  | 1.87894 | 2.04769 | 1.18311 | 0.05317 |
| 21  | 1.93567 | 2.09416 | 1.23810 | 0.06457 |
| 22  | 1.99490 | 2.13382 | 1.28715 | 0.07830 |
| 23  | 2.05502 | 2.16666 | 1.32828 | 0.09482 |
| 24  | 2.11427 | 2.19279 | 1.36011 | 0.11461 |
| 25  | 2.17079 | 2.21241 | 1.38190 | 0.13823 |
| 26  | 2.22286 | 2.22591 | 1.39369 | 0.16628 |
| 27  | 2.26899 | 2.23381 | 1.39615 | 0.19943 |
| 28  | 2.30811 | 2.23680 | 1.39047 | 0.23832 |
| 29  | 2.33961 | 2.23566 | 1.37821 | 0.28360 |
| 30  | 2.36336 | 2.23123 | 1.36102 | 0.33585 |
| 31  | 2.37966 | 2.22437 | 1.34057 | 0.39550 |
| 32  | 2.38913 | 2.21586 | 1.31834 | 0.46281 |
| 33  | 2.39266 | 2.20642 | 1.29562 | 0.53773 |
| 34  | 2.39123 | 2.19665 | 1.27343 | 0.61988 |
| 35  | 2.38587 | 2.18704 | 1.25253 | 0.70850 |
| 36  | 2.37758 | 2.17796 | 1.23345 | 0.80243 |
| 37  | 2.36727 | 2.16968 | 1.21655 | 0.90013 |
| 38  | 2.35575 | 2.16237 | 1.20201 | 0.99980 |
| 39  | 2.34368 | 2.15612 | 1.18987 | 1.09947 |
| 40  | 2.33162 | 2.15098 | 1.18009 | 1.19718 |
| 41  | 2.32001 | 2.14691 | 1.17257 | 1.29113 |
| 42  | 2.30917 | 2.14387 | 1.16713 | 1.37978 |
| 43  | 2.29935 | 2.14177 | 1.16358 | 1.46196 |
| 44  | 2.29070 | 2.14052 | 1.16170 | 1.53691 |
| 45  | 2.28329 | 2.14001 | 1.16126 | 1.60424 |
| 46  | 2.27717 | 2.14013 | 1.16203 | 1.66392 |
| 47  | 2.27231 | 2.14076 | 1.16377 | 1.71620 |
| 48  | 2.26866 | 2.14180 | 1.16626 | 1.76151 |

|     |         |         |         |         |
|-----|---------|---------|---------|---------|
| 49  | 2.26613 | 2.14313 | 1.16930 | 1.80043 |
| 50  | 2.26462 | 2.14467 | 1.17270 | 1.83359 |
| 51  | 2.26400 | 2.14632 | 1.17627 | 1.86167 |
| 52  | 2.26415 | 2.14801 | 1.17987 | 1.88531 |
| 53  | 2.26494 | 2.14968 | 1.18337 | 1.90511 |
| 54  | 2.26623 | 2.15128 | 1.18668 | 1.92164 |
| 55  | 2.26790 | 2.15275 | 1.18970 | 1.93538 |
| 56  | 2.26982 | 2.15407 | 1.19237 | 1.94679 |
| 57  | 2.27189 | 2.15523 | 1.19467 | 1.95622 |
| 58  | 2.27400 | 2.15620 | 1.19658 | 1.96401 |
| 59  | 2.27609 | 2.15698 | 1.19809 | 1.97044 |
| 60  | 2.27808 | 2.15759 | 1.19921 | 1.97573 |
| 61  | 2.27991 | 2.15802 | 1.19998 | 1.98009 |
| 62  | 2.28156 | 2.15829 | 1.20042 | 1.98367 |
| 63  | 2.28299 | 2.15842 | 1.20058 | 1.98661 |
| 64  | 2.28418 | 2.15843 | 1.20049 | 1.98902 |
| 65  | 2.28515 | 2.15833 | 1.20021 | 1.99100 |
| 66  | 2.28588 | 2.15816 | 1.19977 | 1.99263 |
| 67  | 2.28640 | 2.15792 | 1.19922 | 1.99396 |
| 68  | 2.28673 | 2.15764 | 1.19859 | 1.99505 |
| 69  | 2.28688 | 2.15733 | 1.19793 | 1.99595 |
| 70  | 2.28688 | 2.15702 | 1.19726 | 1.99668 |
| 71  | 2.28675 | 2.15671 | 1.19660 | 1.99728 |
| 72  | 2.28653 | 2.15641 | 1.19598 | 1.99777 |
| 73  | 2.28623 | 2.15613 | 1.19541 | 1.99818 |
| 74  | 2.28588 | 2.15588 | 1.19491 | 1.99851 |
| 75  | 2.28551 | 2.15566 | 1.19448 | 1.99878 |
| 76  | 2.28512 | 2.15547 | 1.19411 | 1.99900 |
| 77  | 2.28473 | 2.15532 | 1.19383 | 1.99918 |
| 78  | 2.28436 | 2.15521 | 1.19361 | 1.99933 |
| 79  | 2.28402 | 2.15512 | 1.19346 | 1.99945 |
| 80  | 2.28371 | 2.15507 | 1.19337 | 1.99955 |
| 81  | 2.28344 | 2.15504 | 1.19333 | 1.99963 |
| 82  | 2.28322 | 2.15503 | 1.19334 | 1.99970 |
| 83  | 2.28303 | 2.15505 | 1.19338 | 1.99975 |
| 84  | 2.28289 | 2.15508 | 1.19346 | 1.99980 |
| 85  | 2.28279 | 2.15512 | 1.19355 | 1.99983 |
| 86  | 2.28272 | 2.15517 | 1.19367 | 1.99986 |
| 87  | 2.28269 | 2.15522 | 1.19378 | 1.99989 |
| 88  | 2.28269 | 2.15528 | 1.19391 | 1.99991 |
| 89  | 2.28270 | 2.15533 | 1.19403 | 1.99993 |
| 90  | 2.28274 | 2.15539 | 1.19414 | 1.99994 |
| 91  | 2.28279 | 2.15544 | 1.19425 | 1.99995 |
| 92  | 2.28286 | 2.15549 | 1.19434 | 1.99996 |
| 93  | 2.28292 | 2.15553 | 1.19442 | 1.99997 |
| 94  | 2.28299 | 2.15556 | 1.19449 | 1.99997 |
| 95  | 2.28306 | 2.15559 | 1.19455 | 1.99998 |
| 96  | 2.28313 | 2.15562 | 1.19459 | 1.99998 |
| 97  | 2.28320 | 2.15563 | 1.19462 | 1.99998 |
| 98  | 2.28325 | 2.15564 | 1.19464 | 1.99999 |
| 99  | 2.28330 | 2.15565 | 1.19465 | 1.99999 |
| 100 | 2.28335 | 2.15565 | 1.19465 | 1.99999 |
| 101 | 2.28338 | 2.15565 | 1.19464 | 1.99999 |

1020

1021

1022 **Table S1.2 – Noisy LV dataset.** From the synthetic data, generated with the LV system in Table S1.1, forty  
1023 values were selected and random normal noise was added with mean 0 and standard deviation equal to  
1024 20% of each variable mean.

| $t$ | $X_1$   | $X_2$   | $X_3$   | $X_4$   |
|-----|---------|---------|---------|---------|
| 1   | 1.14111 | 0.94716 | 1.92175 | 0.06256 |
| 3   | 1.36364 | 0.45349 | 1.45431 | 0.06645 |
| 5   | 1.22283 | 0.19582 | 1.33123 | 0.03641 |
| 8   | 1.47489 | 1.02716 | 0.78493 | 0.01857 |
| 13  | 1.68296 | 1.83783 | 0.72635 | 0.20645 |
| 17  | 1.87602 | 0.98039 | 1.33307 | 0.02590 |
| 19  | 2.23270 | 2.28656 | 0.88182 | 0.08578 |
| 24  | 2.46929 | 2.14703 | 1.42853 | 0.30301 |
| 26  | 2.12740 | 1.68427 | 1.24384 | 0.29370 |
| 30  | 2.93876 | 1.47752 | 1.47634 | 0.33315 |
| 31  | 1.60470 | 2.50979 | 0.99567 | 0.31345 |
| 32  | 2.64561 | 2.16238 | 1.21792 | 0.46671 |
| 33  | 2.16612 | 2.30080 | 1.25219 | 0.44936 |
| 40  | 2.90825 | 2.47699 | 1.42807 | 0.59721 |
| 42  | 2.16482 | 2.82494 | 1.06154 | 1.37928 |
| 44  | 2.86258 | 2.10103 | 1.23401 | 1.37031 |
| 46  | 2.30199 | 1.92131 | 1.06248 | 1.91622 |
| 49  | 1.46650 | 2.70250 | 0.96520 | 2.29495 |
| 52  | 2.07311 | 1.79577 | 1.33918 | 1.55672 |
| 53  | 1.52180 | 1.69359 | 1.07106 | 2.03041 |
| 55  | 2.34261 | 1.94310 | 1.50543 | 1.95215 |
| 56  | 3.07809 | 3.11285 | 1.29445 | 1.80656 |
| 62  | 1.30983 | 1.83120 | 1.16429 | 2.13265 |
| 63  | 2.70020 | 2.32062 | 1.30813 | 2.15788 |
| 64  | 1.68571 | 1.69570 | 1.19108 | 1.96368 |
| 67  | 3.06508 | 1.69727 | 1.30761 | 1.92002 |
| 69  | 2.87653 | 2.02694 | 1.10203 | 1.72796 |
| 71  | 1.92870 | 2.69214 | 0.69211 | 1.84299 |
| 73  | 2.17466 | 1.97223 | 1.23306 | 1.94046 |
| 75  | 2.25649 | 2.48677 | 1.35097 | 1.93681 |
| 77  | 2.12334 | 1.58311 | 0.96197 | 2.23364 |
| 78  | 3.38719 | 1.99818 | 0.93052 | 1.93376 |
| 79  | 2.33980 | 1.85041 | 1.09020 | 2.46553 |
| 83  | 1.97877 | 2.01006 | 1.07131 | 1.89393 |
| 84  | 2.55545 | 2.64187 | 1.29245 | 2.38731 |
| 87  | 2.36884 | 2.11299 | 1.22538 | 2.03970 |
| 90  | 2.25285 | 2.22309 | 1.43866 | 1.73292 |
| 91  | 2.24325 | 2.25534 | 1.58509 | 2.14186 |
| 93  | 2.47453 | 1.91424 | 1.19010 | 2.00689 |
| 95  | 1.82853 | 1.59450 | 1.18877 | 1.91223 |

1025

1026

1027 **Table S1.3 – Replicate LV dataset.** 11 points were selected from the synthetic data in Table S1.1. For each  
 1028 time point, five observations were created by multiplying the original value by a normal random variable  
 1029 with mean 1 and standard deviation 0.2.

| $t$ | $X_1$    | $X_2$    | $X_3$    | $X_4$    |
|-----|----------|----------|----------|----------|
| 1   | 1.079474 | 0.307892 | 1.968433 | 0.001177 |
| 1   | 1.228073 | 0.319118 | 1.767284 | 0.001143 |
| 1   | 1.001938 | 0.278408 | 2.035955 | 0.001019 |
| 1   | 1.151608 | 0.34439  | 2.049352 | 0.000994 |
| 1   | 1.106675 | 0.330651 | 1.634474 | 0.001462 |
| 6   | 1.409001 | 0.827832 | 1.033651 | 0.003136 |
| 6   | 1.292779 | 0.655128 | 0.840712 | 0.002841 |
| 6   | 1.186731 | 0.753583 | 0.964293 | 0.003671 |
| 6   | 1.501709 | 0.702128 | 0.846646 | 0.002595 |
| 6   | 1.600803 | 0.778034 | 1.191477 | 0.003243 |
| 11  | 1.553429 | 1.585188 | 0.501395 | 0.008283 |
| 11  | 1.420026 | 1.565142 | 0.721249 | 0.009309 |
| 11  | 1.599542 | 0.772725 | 0.708241 | 0.004804 |
| 11  | 1.642382 | 1.707548 | 0.424371 | 0.00881  |
| 11  | 1.142047 | 1.689577 | 0.992655 | 0.00613  |
| 18  | 1.644046 | 1.84217  | 0.929999 | 0.044789 |
| 18  | 1.780007 | 1.601518 | 1.134646 | 0.030728 |
| 18  | 1.710696 | 1.833336 | 1.096591 | 0.023249 |
| 18  | 1.331607 | 2.483739 | 0.591253 | 0.029612 |
| 18  | 1.357593 | 1.968956 | 1.2092   | 0.017282 |
| 26  | 2.560157 | 2.19029  | 1.010075 | 0.084837 |
| 26  | 2.478865 | 2.142542 | 1.441704 | 0.160821 |
| 26  | 2.920662 | 2.166496 | 1.227926 | 0.177711 |
| 26  | 1.783109 | 1.700208 | 1.23534  | 0.205836 |
| 26  | 1.809358 | 2.395388 | 1.056138 | 0.105769 |
| 33  | 2.230052 | 2.81995  | 1.194645 | 0.540826 |
| 33  | 1.692464 | 2.038453 | 1.113628 | 0.428625 |
| 33  | 2.981684 | 2.168246 | 1.363852 | 0.486374 |
| 33  | 2.095491 | 1.58247  | 1.231077 | 0.474691 |
| 33  | 2.875616 | 2.102594 | 1.238574 | 0.612312 |
| 41  | 1.970818 | 2.333379 | 1.04227  | 1.296557 |
| 41  | 1.611026 | 1.927812 | 1.114056 | 1.438404 |
| 41  | 2.112647 | 2.279129 | 1.081485 | 0.99357  |
| 41  | 2.652937 | 1.953001 | 1.498288 | 1.30327  |
| 41  | 2.261238 | 2.34695  | 1.170614 | 1.306394 |
| 51  | 2.079631 | 1.228253 | 1.209477 | 2.075646 |
| 51  | 1.819921 | 1.666988 | 1.070121 | 1.644326 |
| 51  | 2.454389 | 2.202211 | 1.41537  | 2.439964 |
| 51  | 2.256488 | 2.134285 | 1.231388 | 1.709964 |
| 51  | 2.213276 | 2.102253 | 1.234634 | 1.884561 |
| 60  | 2.165804 | 2.18245  | 1.155609 | 2.283614 |
| 60  | 2.279157 | 1.885294 | 1.137585 | 1.698353 |
| 60  | 2.36829  | 2.52211  | 1.349542 | 2.049815 |
| 60  | 2.234632 | 2.281866 | 1.184983 | 1.165772 |
| 60  | 2.439225 | 1.996245 | 1.501995 | 2.82506  |
| 70  | 1.719859 | 2.411846 | 1.227642 | 1.786889 |
| 70  | 2.570555 | 2.462909 | 1.1756   | 1.878108 |
| 70  | 1.790253 | 1.887747 | 1.142104 | 1.895824 |
| 70  | 2.723166 | 2.042576 | 1.65201  | 1.8243   |
| 70  | 3.007495 | 2.227207 | 0.93787  | 2.226255 |
| 80  | 2.296889 | 2.001374 | 1.396972 | 2.20474  |
| 80  | 2.749139 | 1.714839 | 1.059392 | 1.594539 |
| 80  | 0.9041   | 2.298373 | 1.489557 | 2.267917 |
| 80  | 1.676455 | 1.788501 | 0.766479 | 2.491924 |
| 80  | 2.131265 | 1.738182 | 1.403356 | 1.898047 |

1030

1031



1032 **Table S1.4 – MAR estimates for the noisy LV dataset in Figs. 1 and S4**

1033

|              | MAR without transformation | MAR with log transformation | MAR with smoothing | MAR with log transformation and smoothing |
|--------------|----------------------------|-----------------------------|--------------------|-------------------------------------------|
| $\beta_{11}$ | -0.09089                   | -0.03360                    | 1.06000            | 1.02000                                   |
| $\beta_{21}$ | 0.27209                    | 0.43560                     | 0.13800            | 0.07940                                   |
| $\beta_{31}$ | -0.21012                   | -0.43570                    | 0.07490            | -0.10500                                  |
| $\beta_{41}$ | 0.12619                    | 0.42840                     | -0.33900           | -0.22100                                  |
| $\beta_{12}$ | 0.43295                    | 0.24860                     | -0.05360           | -0.01990                                  |
| $\beta_{22}$ | 0.47619                    | 0.62610                     | 0.91000            | 0.94700                                   |
| $\beta_{32}$ | 0.18150                    | 0.17100                     | 0.01730            | 0.12000                                   |
| $\beta_{42}$ | 0.00788                    | 0.23190                     | 0.22900            | 0.19400                                   |
| $\beta_{13}$ | -0.20530                   | -0.01010                    | -0.01980           | -0.01510                                  |
| $\beta_{23}$ | -0.28009                   | -0.33410                    | -0.07090           | -0.07300                                  |
| $\beta_{33}$ | 0.50995                    | 0.57920                     | 0.86700            | 0.90900                                   |
| $\beta_{43}$ | -0.00869                   | -0.02950                    | -0.03190           | 0.04240                                   |
| $\beta_{14}$ | 0.07772                    | 0.00960                     | -0.00954           | -0.00439                                  |
| $\beta_{24}$ | 0.06929                    | 0.02720                     | -0.02780           | -0.01270                                  |
| $\beta_{34}$ | 0.00957                    | 0.01530                     | -0.00911           | -0.00807                                  |
| $\beta_{44}$ | 0.93364                    | 0.88740                     | 0.98800            | 0.95600                                   |
| $\alpha_1$   | 1.70925                    | 0.63980                     | 0.01030            | 0.00614                                   |
| $\alpha_2$   | 0.67025                    | -0.04340                    | 0.01430            | 0.01390                                   |
| $\alpha_3$   | 0.67931                    | 0.29480                     | -0.00571           | -0.00386                                  |
| $\alpha_4$   | -0.17950                   | -0.45920                    | 0.02010            | 0.04190                                   |
| $\delta_1$   | 0.22184                    | 0.05270                     | 0.00005            | 0.00001                                   |
| $\delta_2$   | 0.19571                    | 0.07520                     | 0.00014            | 0.00003                                   |
| $\delta_3$   | 0.01924                    | 0.01480                     | 0.00049            | 0.00028                                   |
| $\delta_4$   | 0.04708                    | 0.07570                     | 0.00005            | 0.00010                                   |

1034

1035

1036

1037 **Table S1.5 – MAR estimates for the replicate LV dataset in Figs. 1 and S4**

1038

|              | MAR without transformation | MAR with log transformation | MAR with smoothing | MAR with log transformation and smoothing |
|--------------|----------------------------|-----------------------------|--------------------|-------------------------------------------|
| $\beta_{11}$ | 0.77800                    | 0.76500                     | 1.01000            | 1.07000                                   |
| $\beta_{21}$ | 0.07760                    | 0.21000                     | 0.00367            | 0.07720                                   |
| $\beta_{31}$ | -0.08920                   | -0.31200                    | -0.01630           | -0.10700                                  |
| $\beta_{41}$ | 0.09140                    | 0.13400                     | 0.23200            | 0.38400                                   |
| $\beta_{12}$ | 0.13500                    | 0.11600                     | -0.00781           | -0.00292                                  |
| $\beta_{22}$ | 0.87500                    | 0.80500                     | 0.93600            | 0.88300                                   |
| $\beta_{32}$ | 0.14900                    | 0.22500                     | 0.10400            | 0.14800                                   |
| $\beta_{42}$ | -0.00518                   | 0.17400                     | -0.08900           | 0.06510                                   |
| $\beta_{13}$ | 0.24800                    | 0.22200                     | -0.00982           | -0.00328                                  |
| $\beta_{23}$ | -0.20400                   | -0.18300                    | -0.10300           | -0.05940                                  |
| $\beta_{33}$ | 0.94400                    | 1.13000                     | 0.86500            | 0.98300                                   |
| $\beta_{43}$ | 0.01090                    | 0.17500                     | -0.02880           | 0.04240                                   |
| $\beta_{14}$ | -0.02600                   | -0.01100                    | -0.02170           | -0.00991                                  |
| $\beta_{24}$ | -0.00159                   | -0.00250                    | -0.00530           | -0.00583                                  |
| $\beta_{34}$ | -0.00022                   | -0.00299                    | 0.00004            | -0.00317                                  |
| $\beta_{44}$ | 0.97200                    | 0.93000                     | 0.96400            | 0.93000                                   |
| $\alpha_1$   | 0.02400                    | 0.01470                     | 0.00925            | 0.00610                                   |
| $\alpha_2$   | 0.02610                    | 0.03690                     | 0.01980            | 0.02190                                   |
| $\alpha_3$   | -0.02240                   | -0.01470                    | -0.00880           | -0.00573                                  |
| $\alpha_4$   | 0.02160                    | 0.10700                     | 0.02500            | 0.09300                                   |
| $\delta_1$   | 0.00557                    | 0.00089                     | 0.00008            | 0.00001                                   |
| $\delta_2$   | 0.00243                    | 0.00073                     | 0.00037            | 0.00009                                   |
| $\delta_3$   | 0.00001                    | 0.00004                     | 0.00024            | 0.00043                                   |
| $\delta_4$   | 0.00559                    | 0.00267                     | 0.00029            | 0.00022                                   |

1039

1040

1041 **Table S2.1 - MAR estimates for the noisy dataset in Fig. S3**  
 1042

|              | MAR without transformation | MAR with log transformation | MAR with smoothing | MAR with log transformation and smoothing |
|--------------|----------------------------|-----------------------------|--------------------|-------------------------------------------|
| $\beta_{11}$ | 0.23009                    | 0.01769                     | 0.90100            | 0.93300                                   |
| $\beta_{21}$ | 0.11849                    | 0.16822                     | -0.18000           | -0.10300                                  |
| $\beta_{31}$ | -0.18449                   | -0.35186                    | -0.26400           | -0.61400                                  |
| $\beta_{41}$ | 0.14318                    | 2.18894                     | 0.40800            | 1.05000                                   |
| $\beta_{12}$ | 0.34796                    | 0.23560                     | 0.03870            | 0.01540                                   |
| $\beta_{22}$ | 0.84182                    | 0.75617                     | 1.05000            | 0.94800                                   |
| $\beta_{32}$ | 0.19214                    | 0.17605                     | 0.18600            | 0.20600                                   |
| $\beta_{42}$ | -0.03130                   | 0.01950                     | -0.15300           | -0.06350                                  |
| $\beta_{13}$ | 0.21488                    | 0.18478                     | -0.00110           | 0.00908                                   |
| $\beta_{23}$ | -0.04121                   | 0.02412                     | -0.10500           | -0.04810                                  |
| $\beta_{33}$ | 0.78353                    | 0.91531                     | 0.87900            | 1.02000                                   |
| $\beta_{43}$ | 0.01040                    | 1.00320                     | -0.02870           | 0.05100                                   |
| $\beta_{14}$ | 0.03493                    | 0.01754                     | -0.00471           | -0.00229                                  |
| $\beta_{24}$ | -0.00776                   | 0.00115                     | -0.00050           | -0.00170                                  |
| $\beta_{34}$ | -0.00548                   | 0.00382                     | 0.01160            | 0.01240                                   |
| $\beta_{44}$ | 0.97027                    | 0.81890                     | 0.95100            | 0.91800                                   |
| $\alpha_1$   | -0.00061                   | 0.00073                     | 0.01020            | 0.00586                                   |
| $\alpha_2$   | 0.02045                    | 0.03086                     | 0.02000            | 0.02130                                   |
| $\alpha_3$   | -0.01764                   | -0.01187                    | -0.00431           | -0.00279                                  |
| $\alpha_4$   | 0.02229                    | 0.04416                     | 0.02100            | 0.06150                                   |
| $\delta_1$   | 0.01953                    | 0.00318                     | 0.00001            | 0.00000                                   |
| $\delta_2$   | 0.01746                    | 0.01414                     | 0.00002            | 0.00000                                   |
| $\delta_3$   | 0.00158                    | 0.00121                     | 0.00002            | 0.00004                                   |
| $\delta_4$   | 0.00363                    | 0.39522                     | 0.00038            | 0.00007                                   |

1043  
 1044  
 1045

1046 **Table S2.2 - MAR estimates for the replicate dataset in Fig. S3**  
 1047

|              | MAR without transformation | MAR with log transformation | MAR with smoothing | MAR with log transformation and smoothing |
|--------------|----------------------------|-----------------------------|--------------------|-------------------------------------------|
| $\beta_{11}$ | 0.83000                    | 0.81000                     | 0.88600            | 0.87400                                   |
| $\beta_{21}$ | -0.06680                   | 0.02220                     | -0.05350           | 0.04420                                   |
| $\beta_{31}$ | -0.12600                   | -0.35400                    | -0.09890           | -0.39000                                  |
| $\beta_{41}$ | 0.23600                    | 0.37800                     | 0.23500            | 0.41700                                   |
| $\beta_{12}$ | 0.07710                    | 0.04860                     | 0.05470            | 0.04280                                   |
| $\beta_{22}$ | 0.97800                    | 0.89700                     | 0.97600            | 0.90000                                   |
| $\beta_{32}$ | 0.16200                    | 0.19000                     | 0.13100            | 0.19100                                   |
| $\beta_{42}$ | -0.07360                   | 0.10500                     | -0.08250           | 0.08650                                   |
| $\beta_{13}$ | 0.12900                    | 0.11100                     | 0.05310            | 0.06250                                   |
| $\beta_{23}$ | -0.06320                   | -0.03200                    | -0.09610           | -0.06310                                  |
| $\beta_{33}$ | 0.87400                    | 1.02000                     | 0.89000            | 1.06000                                   |
| $\beta_{43}$ | -0.04980                   | 0.06360                     | -0.02580           | 0.08010                                   |
| $\beta_{14}$ | -0.00609                   | -0.00121                    | -0.00871           | -0.00304                                  |
| $\beta_{24}$ | -0.00592                   | -0.00445                    | -0.00621           | -0.00488                                  |
| $\beta_{34}$ | -0.00154                   | 0.00406                     | -0.00073           | 0.00508                                   |
| $\beta_{44}$ | 0.96100                    | 0.92600                     | 0.96300            | 0.92500                                   |
| $\alpha_1$   | 0.02250                    | 0.01380                     | 0.01240            | 0.00749                                   |
| $\alpha_2$   | 0.03120                    | 0.04080                     | 0.02220            | 0.02350                                   |
| $\alpha_3$   | -0.02690                   | -0.01750                    | -0.00777           | -0.00512                                  |
| $\alpha_4$   | 0.01850                    | 0.10700                     | 0.02520            | 0.09450                                   |
| $\delta_1$   | 0.00052                    | 0.00004                     | 0.00007            | 0.00001                                   |
| $\delta_2$   | 0.00029                    | 0.00007                     | 0.00004            | 0.00001                                   |
| $\delta_3$   | 0.00002                    | 0.00000                     | 0.00002            | 0.00001                                   |
| $\delta_4$   | 0.00219                    | 0.00114                     | 0.00039            | 0.00014                                   |

1048

1049

1050

1051 **Table S3.1 – Initial conditions, parameter values and estimates for a four-variable LV system that**  
 1052 **converges to a stable steady state, as presented in Fig. S5**

|          | Initial Condition          | Estimate |              |                     |                |
|----------|----------------------------|----------|--------------|---------------------|----------------|
| $X_1$    | 1.2                        | 1.20993  |              |                     |                |
| $X_2$    | 0.3                        | 0.31991  |              |                     |                |
| $X_3$    | 2                          | 1.82146  |              |                     |                |
| $X_4$    | 0.001                      | 0.00104  |              |                     |                |
|          | True<br>Parameter<br>Value | ALVI-MI  |              | MAR with log<br>MAR | transformation |
| $a_1$    | 0.044                      | 0.04398  | $\beta_{11}$ | 0.89300             | 0.88800        |
| $b_{11}$ | -0.08                      | -0.07995 | $\beta_{21}$ | -0.07190            | 0.08510        |
| $b_{12}$ | 0.02                       | 0.01997  | $\beta_{31}$ | -0.17500            | -0.43000       |
| $b_{13}$ | 0.08                       | 0.07999  | $\beta_{41}$ | 0.19200             | 0.42800        |
| $b_{14}$ | 0                          | -0.00001 | $\beta_{12}$ | 0.04840             | 0.03110        |
| $a_2$    | 0.216                      | 0.21599  | $\beta_{22}$ | 0.99000             | 0.91100        |
| $b_{21}$ | -0.04                      | -0.04000 | $\beta_{32}$ | 0.16800             | 0.18000        |
| $b_{22}$ | -0.08                      | -0.08001 | $\beta_{42}$ | -0.05440            | 0.11000        |
| $b_{23}$ | 0.04                       | 0.04002  | $\beta_{13}$ | 0.06600             | 0.06700        |
| $b_{24}$ | 0                          | 0.00000  | $\beta_{23}$ | -0.07540            | -0.06800       |
| $a_3$    | 0.116                      | 0.11600  | $\beta_{33}$ | 0.91100             | 1.03000        |
| $b_{31}$ | -0.16                      | -0.15993 | $\beta_{43}$ | -0.00639            | 0.03510        |
| $b_{32}$ | 0.16                       | 0.15998  | $\beta_{14}$ | -0.00719            | -0.00229       |
| $b_{33}$ | -0.08                      | -0.08007 | $\beta_{24}$ | -0.00739            | -0.00763       |
| $b_{34}$ | 0                          | -0.00001 | $\beta_{34}$ | 0.00126             | 0.00751        |
| $a_4$    | 0.2                        | 0.20002  | $\beta_{44}$ | 0.96300             | 0.92400        |
| $b_{41}$ | 0                          | -0.00001 | $\alpha_1$   | 0.07320             | 0.05740        |
| $b_{42}$ | 0                          | 0.00000  | $\alpha_2$   | 0.28900             | 0.01420        |
| $b_{43}$ | 0                          | 0.00000  | $\alpha_3$   | 0.14200             | 0.20700        |
| $b_{44}$ | -0.1                       | -0.10000 | $\alpha_4$   | -0.22800            | -0.38500       |
|          |                            |          | $\delta_1$   | 0.00014             | 0.00006        |
|          |                            |          | $\delta_2$   | 0.00004             | 0.00031        |
|          |                            |          | $\delta_3$   | 0.00064             | 0.00020        |
|          |                            |          | $\delta_4$   | 0.00032             | 0.00032        |

1053

1054

1055 **Table S3.2 – Initial conditions, parameter values and estimates for a four-variable LV system exhibiting**  
 1056 **damped oscillations as presented in Fig. S5**

|          | Initial Condition          | Estimate |              |          |                                |
|----------|----------------------------|----------|--------------|----------|--------------------------------|
| $X_1$    | 0.3                        | 0.3      |              |          |                                |
| $X_2$    | 0.3                        | 0.3      |              |          |                                |
| $X_3$    | 0.4                        | 0.4      |              |          |                                |
| $X_4$    | 0.6                        | 0.6      |              |          |                                |
|          | True<br>Parameter<br>Value | ALVI-MI  |              | MAR      | MAR with log<br>transformation |
| $a_1$    | 0.3                        | 0.30245  | $\beta_{11}$ | 1.05000  | 0.98800                        |
| $b_{11}$ | -0.3                       | -0.30328 | $\beta_{21}$ | 0.14700  | 0.01610                        |
| $b_{12}$ | -0.27                      | -0.27098 | $\beta_{31}$ | -0.25300 | -0.07880                       |
| $b_{13}$ | -0.6                       | -0.60467 | $\beta_{41}$ | -0.23100 | -0.05360                       |
| $b_{14}$ | -0.045                     | -0.04708 | $\beta_{12}$ | -0.08350 | -0.11600                       |
| $a_2$    | 0.4                        | 0.40299  | $\beta_{22}$ | 0.88800  | 0.92200                        |
| $b_{21}$ | 0.2                        | 0.19592  | $\beta_{32}$ | 0.04880  | -0.03410                       |
| $b_{22}$ | -0.4                       | -0.40118 | $\beta_{42}$ | -0.00228 | -0.07260                       |
| $b_{23}$ | -0.4                       | -0.40578 | $\beta_{13}$ | 0.03660  | -0.04410                       |
| $b_{24}$ | -0.6                       | -0.60250 | $\beta_{23}$ | -0.07340 | -0.06540                       |
| $a_3$    | 0.7                        | 0.71519  | $\beta_{33}$ | 0.71200  | 0.89700                        |
| $b_{31}$ | -2.38                      | -2.39901 | $\beta_{43}$ | -0.20500 | -0.02050                       |
| $b_{32}$ | 0.35                       | 0.34344  | $\beta_{14}$ | -0.10400 | -0.01220                       |
| $b_{33}$ | -2.8                       | -2.82806 | $\beta_{24}$ | -0.12800 | -0.03300                       |
| $b_{34}$ | 0.35                       | 0.33650  | $\beta_{34}$ | 0.03690  | -0.14100                       |
| $a_4$    | 0.6                        | 0.60791  | $\beta_{44}$ | 0.96100  | 0.88100                        |
| $b_{41}$ | -0.96                      | -0.97003 | $\alpha_1$   | 0.04710  | -0.22200                       |
| $b_{42}$ | -0.24                      | -0.24338 | $\alpha_2$   | 0.08150  | -0.17700                       |
| $b_{43}$ | -0.96                      | -0.97466 | $\alpha_3$   | 0.06750  | -0.56600                       |
| $b_{44}$ | -0.6                       | -0.60704 | $\alpha_4$   | 0.08660  | -0.38800                       |
|          |                            |          | $\delta_1$   | 0.00000  | 0.00004                        |
|          |                            |          | $\delta_2$   | 0.00002  | 0.00016                        |
|          |                            |          | $\delta_3$   | 0.00015  | 0.00271                        |
|          |                            |          | $\delta_4$   | 0.00015  | 0.00065                        |

1057

1058

1059

1060 **Table S3.3 – Initial conditions, parameter values and estimates for a four-variable LV system**  
 1061 **displaying initially erratic oscillations, but converging to a limit cycle as presented in Fig. S5**

|          | Initial Condition | Estimate |              |          |                             |
|----------|-------------------|----------|--------------|----------|-----------------------------|
| $X_1$    | 0.3               | 0.3      |              |          |                             |
| $X_2$    | 0.3               | 0.3      |              |          |                             |
| $X_3$    | 0.4               | 0.4      |              |          |                             |
| $X_4$    | 0.6               | 0.6      |              |          |                             |
|          | True              |          |              |          |                             |
|          | Parameter         |          |              |          |                             |
|          | Value             | ALVI-MI  |              | MAR      | MAR with log transformation |
| $a_1$    | 1                 | 0.98743  | $\beta_{11}$ | 0.87600  | 0.94673                     |
| $b_{11}$ | -1                | -0.99101 | $\beta_{21}$ | 0.26700  | 0.19269                     |
| $b_{12}$ | -1.09             | -1.08083 | $\beta_{31}$ | -0.11100 | -0.77772                    |
| $b_{13}$ | -1.52             | -1.51341 | $\beta_{41}$ | -0.17600 | -0.18648                    |
| $b_{14}$ | 0                 | 0.01346  | $\beta_{12}$ | -0.13600 | -0.11408                    |
| $a_2$    | 0.72              | 0.72230  | $\beta_{22}$ | 0.90900  | 0.88847                     |
| $b_{21}$ | 0                 | -0.00274 | $\beta_{32}$ | 0.03980  | 0.59990                     |
| $b_{22}$ | -0.72             | -0.72223 | $\beta_{42}$ | 0.06220  | 0.11789                     |
| $b_{23}$ | -0.3168           | -0.31966 | $\beta_{13}$ | -0.44100 | 0.00528                     |
| $b_{24}$ | -0.9792           | -0.97942 | $\beta_{23}$ | 0.07280  | 0.01411                     |
| $a_3$    | 1.53              | 1.53466  | $\beta_{33}$ | 0.86500  | 0.93625                     |
| $b_{31}$ | -3.672            | -3.67283 | $\beta_{43}$ | -0.03720 | -0.00153                    |
| $b_{32}$ | 0                 | -0.00071 | $\beta_{14}$ | 0.36500  | 0.00392                     |
| $b_{33}$ | -1.53             | -1.52615 | $\beta_{24}$ | -0.19100 | -0.17211                    |
| $b_{34}$ | -0.7191           | -0.73207 | $\beta_{34}$ | -0.02410 | 0.33444                     |
| $a_4$    | 1.27              | 1.27361  | $\beta_{44}$ | 0.93800  | 0.97758                     |
| $b_{41}$ | -1.5367           | -1.53884 | $\alpha_1$   | 0.02540  | -0.12418                    |
| $b_{42}$ | -0.6477           | -0.64952 | $\alpha_2$   | 0.01980  | -0.00507                    |
| $b_{43}$ | -0.4445           | -0.44519 | $\alpha_3$   | 0.03310  | -0.28038                    |
| $b_{44}$ | -1.27             | -1.27581 | $\alpha_4$   | 0.04680  | -0.16530                    |
|          |                   |          | $\delta_1$   | 0.00001  | 0.00057                     |
|          |                   |          | $\delta_2$   | 0.00001  | 0.00012                     |
|          |                   |          | $\delta_3$   | 0.00013  | 0.00112                     |
|          |                   |          | $\delta_4$   | 0.00005  | 0.00022                     |

1062

1063

1064 **Table S3.4 – Initial conditions, parameter values and estimates for a four-variable LV system**  
 1065 **displaying damped oscillations as presented in Fig. S5**

|          | Initial Condition | Estimate |              |          |                             |
|----------|-------------------|----------|--------------|----------|-----------------------------|
| $X_1$    | 0.3               | 0.3      |              |          |                             |
| $X_2$    | 0.3               | 0.3      |              |          |                             |
| $X_3$    | 0.4               | 0.4      |              |          |                             |
| $X_4$    | 0.6               | 0.6      |              |          |                             |
|          | True              |          |              |          |                             |
|          | Parameter         |          |              |          |                             |
|          | Value             | ALVI-MI  |              | MAR      | MAR with log transformation |
| $a_1$    | 0.3               | 0.27831  | $\beta_{11}$ | 0.96100  | 1.02036                     |
| $b_{11}$ | -0.3              | -0.30250 | $\beta_{21}$ | 0.17900  | 0.10195                     |
| $b_{12}$ | -0.27             | -0.25033 | $\beta_{31}$ | -0.15100 | -0.09094                    |
| $b_{13}$ | -0.6              | -0.59705 | $\beta_{41}$ | -0.20000 | -0.04845                    |
| $b_{14}$ | -0.045            | -0.00606 | $\beta_{12}$ | -0.07430 | -0.05021                    |
| $a_2$    | 0.4               | 0.36675  | $\beta_{22}$ | 0.94200  | 0.98452                     |
| $b_{21}$ | 0.2               | 0.19193  | $\beta_{32}$ | -0.05210 | -0.02708                    |
| $b_{22}$ | -0.4              | -0.36840 | $\beta_{42}$ | -0.01790 | -0.03530                    |
| $b_{23}$ | -0.4              | -0.40045 | $\beta_{13}$ | -0.09270 | 0.00210                     |
| $b_{24}$ | -0.6              | -0.53672 | $\beta_{23}$ | 0.00417  | -0.00943                    |
| $a_3$    | 0.7               | 0.64222  | $\beta_{33}$ | 0.82100  | 1.05860                     |
| $b_{31}$ | -2.38             | -2.37532 | $\beta_{43}$ | -0.15000 | 0.02181                     |
| $b_{32}$ | 0.35              | 0.39856  | $\beta_{14}$ | -0.00981 | 0.02438                     |
| $b_{33}$ | -2.45             | -2.42900 | $\beta_{24}$ | -0.10400 | -0.00099                    |
| $b_{34}$ | 0.35              | 0.44414  | $\beta_{34}$ | -0.12500 | -0.32180                    |
| $a_4$    | 0.6               | 0.55927  | $\beta_{44}$ | 0.96300  | 0.89997                     |
| $b_{41}$ | -0.96             | -0.96318 | $\alpha_1$   | 0.05890  | 0.00507                     |
| $b_{42}$ | -0.24             | -0.20356 | $\alpha_2$   | 0.01900  | 0.11510                     |
| $b_{43}$ | -0.96             | -0.95279 | $\alpha_3$   | 0.13300  | -0.41484                    |
| $b_{44}$ | -0.3              | -0.22817 | $\alpha_4$   | 0.09470  | -0.17804                    |
|          |                   |          | $\delta_1$   | 0.00003  | 0.00018                     |
|          |                   |          | $\delta_2$   | 0.00010  | 0.00101                     |
|          |                   |          | $\delta_3$   | 0.00014  | 0.00935                     |
|          |                   |          | $\delta_4$   | 0.00008  | 0.00056                     |

1066

1067



1068 **Table S3.5 – Initial conditions, parameter values and estimates for a four-variable LV system**  
 1069 **displaying deterministic chaos (chaos 1) as presented in Fig. S5**

|          | Initial Condition | Estimate |              |          |                             |
|----------|-------------------|----------|--------------|----------|-----------------------------|
| $X_1$    | 0.3               | 0.3      |              |          |                             |
| $X_2$    | 0.3               | 0.3      |              |          |                             |
| $X_3$    | 0.4               | 0.4      |              |          |                             |
| $X_4$    | 0.6               | 0.6      |              |          |                             |
|          | True              |          |              |          |                             |
|          | Parameter         |          |              |          |                             |
|          | Value             | ALVI-MI  |              | MAR      | MAR with log transformation |
| $a_1$    | 1                 | 1.01561  | $\beta_{11}$ | 0.85600  | 1.00059                     |
| $b_{11}$ | -1                | -1.01294 | $\beta_{21}$ | 0.26400  | 0.20355                     |
| $b_{12}$ | -1.09             | -1.10110 | $\beta_{31}$ | -0.16900 | -0.79454                    |
| $b_{13}$ | -1.52             | -1.52409 | $\beta_{41}$ | -0.21800 | -0.23777                    |
| $b_{14}$ | 0                 | -0.01741 | $\beta_{12}$ | -0.14300 | -0.10901                    |
| $a_2$    | 0.72              | 0.72904  | $\beta_{22}$ | 0.88800  | 0.88053                     |
| $b_{21}$ | 0                 | -0.00777 | $\beta_{32}$ | 0.01640  | 0.59018                     |
| $b_{22}$ | -0.72             | -0.72674 | $\beta_{42}$ | 0.02020  | 0.08015                     |
| $b_{23}$ | -0.3168           | -0.32100 | $\beta_{13}$ | -0.47500 | -0.03240                    |
| $b_{24}$ | -0.9792           | -0.98775 | $\beta_{23}$ | 0.10500  | 0.03330                     |
| $a_3$    | 1.53              | 1.48293  | $\beta_{33}$ | 1.07000  | 0.76513                     |
| $b_{31}$ | -3.5649           | -3.52631 | $\beta_{43}$ | 0.06420  | -0.03995                    |
| $b_{32}$ | 0                 | 0.03573  | $\beta_{14}$ | 0.38200  | 0.17765                     |
| $b_{33}$ | -1.53             | -1.50898 | $\beta_{24}$ | -0.24000 | -0.23158                    |
| $b_{34}$ | -0.7191           | -0.67335 | $\beta_{34}$ | -0.21500 | 0.90744                     |
| $a_4$    | 1.27              | 1.25074  | $\beta_{44}$ | 0.80900  | 1.08027                     |
| $b_{41}$ | -1.5367           | -1.52127 | $\alpha_1$   | 0.03510  | 0.01644                     |
| $b_{42}$ | -0.6477           | -0.63310 | $\alpha_2$   | 0.04320  | -0.01131                    |
| $b_{43}$ | -0.4445           | -0.43667 | $\alpha_3$   | 0.11000  | -0.11896                    |
| $b_{44}$ | -1.27             | -1.25061 | $\alpha_4$   | 0.11500  | -0.24402                    |
|          |                   |          | $\delta_1$   | 0.00002  | 0.00114                     |
|          |                   |          | $\delta_2$   | 0.00002  | 0.00015                     |
|          |                   |          | $\delta_3$   | 0.00022  | 0.00191                     |
|          |                   |          | $\delta_4$   | 0.00006  | 0.00024                     |

1070

1071

1072 **Table S3.6 – Initial conditions, parameter values and estimates for a four-variable LV system**  
 1073 **displaying deterministic chaos (chaos 2) as presented in Fig. S5**

|          | Initial Condition | Estimate |              |          |                             |
|----------|-------------------|----------|--------------|----------|-----------------------------|
| $X_1$    | 0.3               | 0.3      |              |          |                             |
| $X_2$    | 0.3               | 0.3      |              |          |                             |
| $X_3$    | 0.4               | 0.4      |              |          |                             |
| $X_4$    | 0.6               | 0.6      |              |          |                             |
|          | True              |          |              |          |                             |
|          | Parameter         |          |              |          |                             |
|          | Value             | ALVI-MI  |              | MAR      | MAR with log transformation |
| $a_1$    | 0.3               | 0.29277  | $\beta_{11}$ | 1.05000  | 0.97700                     |
| $b_{11}$ | -0.3              | -0.25379 | $\beta_{21}$ | 0.00560  | 0.02030                     |
| $b_{12}$ | -0.27             | -0.28051 | $\beta_{31}$ | -0.31600 | -0.08880                    |
| $b_{13}$ | -0.6              | -0.55795 | $\beta_{41}$ | -0.23000 | -0.06400                    |
| $b_{14}$ | -0.045            | -0.07045 | $\beta_{12}$ | -0.09830 | -0.01780                    |
| $a_2$    | 0.4               | 0.39048  | $\beta_{22}$ | 0.99000  | 1.00000                     |
| $b_{21}$ | 0.2               | 0.26661  | $\beta_{32}$ | 0.08310  | -0.02620                    |
| $b_{22}$ | -0.4              | -0.41601 | $\beta_{42}$ | -0.01940 | -0.01610                    |
| $b_{23}$ | -0.4              | -0.33988 | $\beta_{13}$ | -0.00541 | -0.06900                    |
| $b_{24}$ | -0.6              | -0.63818 | $\beta_{23}$ | -0.12100 | -0.07290                    |
| $a_3$    | 0.8               | 0.77659  | $\beta_{33}$ | 0.70200  | 0.87400                     |
| $b_{31}$ | -2.38             | -2.23922 | $\beta_{43}$ | -0.18000 | -0.05050                    |
| $b_{32}$ | 0.35              | 0.31928  | $\beta_{14}$ | -0.08040 | 0.05960                     |
| $b_{33}$ | -2.45             | -2.32117 | $\beta_{24}$ | 0.00941  | -0.02020                    |
| $b_{34}$ | 0.35              | 0.27470  | $\beta_{34}$ | 0.07400  | -0.14500                    |
| $a_4$    | 0.6               | 0.58578  | $\beta_{44}$ | 0.97300  | 0.94100                     |
| $b_{41}$ | -0.96             | -0.86962 | $\alpha_1$   | 0.05270  | -0.11500                    |
| $b_{42}$ | -0.24             | -0.26048 | $\alpha_2$   | 0.02820  | -0.09870                    |
| $b_{43}$ | -0.96000          | -0.87774 | $\alpha_3$   | 0.07760  | -0.53700                    |
| $b_{44}$ | -0.30000          | -0.34969 | $\alpha_4$   | 0.10200  | -0.28000                    |
|          |                   |          | $\delta_1$   | 0.00000  | 0.00006                     |
|          |                   |          | $\delta_2$   | 0.00002  | 0.00023                     |
|          |                   |          | $\delta_3$   | 0.00009  | 0.00115                     |
|          |                   |          | $\delta_4$   | 0.00007  | 0.00025                     |

1074

1075

1076

1077 **Table S4.1 – ALVI-MI estimates for five experimental data examples from (Mühlbauer et al., 2020).** Data  
 1078 came from experiments described in (Gause, 1934), (McLaren & Peterson, 1994) and (Huffaker et al.,  
 1079 1963). See R package gauseR (Mühlbauer et al., 2020) for datasets “gause\_1934\_science\_f02\_03”,  
 1080 “gause\_1934\_book\_f32”, “mclaren\_1994\_f03” and “huffaker\_1963” for details on observations.  
 1081 Parameter estimates from Mühlbauer *et al.* can also be found in Table 2 in their paper.

1082

Example 1 - *Paramecium caudatum* in monoculture. The slopes were estimated from an 8DF-spline from data without log transformation and ALVI-MI using a subsample of spline points at the 3<sup>rd</sup> and 12<sup>th</sup> days.

|          | Mühlbauer <i>et al.</i> | Estimate | Absolute Difference |
|----------|-------------------------|----------|---------------------|
| $a_1$    | 1.259                   | 0.92289  | 0.33611             |
| $b_{11}$ | -0.005                  | -0.00456 | 0.00044             |

Example 2 - *Paramecium caudatum* and *Paramecium aurelia* in a mixed population competition study. ALVI-MI was estimated from 10DF and 7DF-splines for *P. caudatum* and *P. Aurelia*, respectively. Spline points were taken at days 4, 8 and 11.

|          | Mühlbauer <i>et al.</i> | Estimate | Absolute Difference |
|----------|-------------------------|----------|---------------------|
| $a_1$    | 1.259                   | 0.98677  | 0.27223             |
| $b_{11}$ | -0.005                  | -0.00409 | 0.00091             |
| $b_{12}$ | 1.259                   | -0.00649 | 1.26549             |
| $a_2$    | -0.005                  | 0.79868  | 0.80368             |
| $b_{21}$ | 1.259                   | -0.00136 | 1.26036             |
| $b_{22}$ | -0.005                  | -0.00536 | 0.00036             |

Example 3 - Predator-prey interactions between *Didinium nasutum* and *Paramecium caudatum*. ALVI-MI estimates were calculated using 14DF and 10DF-splines, respectively, using a subsample of the 122<sup>nd</sup>, 140<sup>th</sup>, 168<sup>th</sup> points of the second spline.

|          | Mühlbauer <i>et al.</i> | Estimate | Absolute Difference |
|----------|-------------------------|----------|---------------------|
| $a_1$    | 1.099                   | 1.70706  | 0.60806             |
| $b_{11}$ | -0.013                  | -0.03887 | 0.02587             |
| $b_{12}$ | -0.078                  | -0.11360 | 0.03560             |
| $a_2$    | -0.89                   | -1.27639 | 0.38639             |
| $b_{21}$ | 0.084                   | 0.14275  | 0.05875             |
| $b_{22}$ | -0.002                  | 0.01565  | 0.01765             |

Example 4 - Multi-trophic dynamics for wolves, moose, and fir trees. ALVI-MI estimates were calculated using log-abundances and 8DF-splines. Spline points were chosen as a subsample corresponding to the years 1973, 1978, 1979 and 1982.

|          | Mühlbauer <i>et al.</i> | Estimate  | Absolute Difference |
|----------|-------------------------|-----------|---------------------|
| $a_1$    | 0.01                    | -1.901823 | 1.91182             |
| $b_{11}$ | -0.003                  | 0.028812  | 0.03181             |
| $b_{12}$ | 0.00004                 | 0.000003  | 0.00004             |
| $b_{13}$ | 0                       | 2.754448  | 2.75445             |
| $a_2$    | 2.021                   | 0.331244  | 1.68976             |
| $b_{21}$ | -0.088                  | -0.006836 | 0.08116             |
| $b_{22}$ | 0                       | -0.000107 | 0.00011             |
| $b_{23}$ | 0.002                   | -0.090569 | 0.09257             |
| $a_3$    | 0.238                   | 2.779411  | 2.54141             |
| $b_{31}$ | 0                       | -0.051545 | 0.05154             |
| $b_{32}$ | -0.0002                 | 0.000494  | 0.00069             |
| $b_{33}$ | -0.139                  | -4.693609 | 4.55461             |

1083

1084

Example 5 - Predator-prey interactions between *E. sexmaculatus* and *T. occidentalis*. ALVI-MI estimates were calculated using 15DF and 20DF-splines, respectively. The splines were constructed using log-abundances of the dependent variables, using a subsample of spline points corresponding to the 17<sup>th</sup>, 48<sup>th</sup> and 55<sup>th</sup> datapoints.

|          | Mühlbauer <i>et al.</i> | Estimate | Absolute Difference |
|----------|-------------------------|----------|---------------------|
| $a_1$    | 0.187                   | 0.11148  | 0.07552             |
| $b_{11}$ | 0                       | 0.00003  | 0.00003             |
| $b_{12}$ | -0.028                  | -0.02960 | 0.00160             |
| $a_2$    | -0.377                  | -0.80007 | 0.42307             |
| $b_{21}$ | 0.0012                  | 0.00251  | 0.00131             |
| $b_{22}$ | -0.024                  | -0.03144 | 0.00744             |

1085

1086

1087 **Table S4.2 – ALVI-LR estimates for five experimental data sets from (Mühlbauer et al., 2020).** Data came  
 1088 from (Gause, 1934), (McLaren & Peterson, 1994) and (Huffaker et al., 1963) experiments. See R package  
 1089 gauseR (Mühlbauer et al., 2020) datasets “gause\_1934\_science\_f02\_03”, “gause\_1934\_book\_f32”,  
 1090 ”mclaren\_1994\_f03” and “huffaker\_1963” for details on observations. Parameter estimates from  
 1091 Mühlbauer *et al.* can also be found in Table 2 of their paper.

Example 1 - *Paramecium caudatum* in monoculture, analyzed with 8DF-spline

|          | Mühlbauer <i>et al.</i> | Estimate | Absolute Difference |
|----------|-------------------------|----------|---------------------|
| $a_1$    | 1.259                   | 0.93948  | 0.31952             |
| $b_{11}$ | -0.005                  | -0.00465 | 0.00035             |

Example 2 - *Paramecium caudatum* and *Paramecium aurelia* in mixed population, analyzed with 10DF and 7DF-splines

|          | Mühlbauer <i>et al.</i> | Estimate | Absolute Difference |
|----------|-------------------------|----------|---------------------|
| $a_1$    | 1.259                   | 0.85524  | 0.40376             |
| $b_{11}$ | -0.005                  | -0.00289 | 0.00211             |
| $b_{12}$ | -0.008                  | -0.00580 | 0.00220             |
| $a_2$    | 1.026                   | 0.84423  | 0.18177             |
| $b_{21}$ | -0.002                  | -0.00187 | 0.00013             |
| $b_{22}$ | -0.007                  | -0.00553 | 0.00147             |

Example 3 - Predator-prey interactions between *Didinium nasutum* and *Paramecium caudatum*, analyzed with 14DF and 10DF-splines

|          | Mühlbauer <i>et al.</i> | Estimate | Absolute Difference |
|----------|-------------------------|----------|---------------------|
| $a_1$    | 1.099                   | 0.45652  | 0.64248             |
| $b_{11}$ | -0.013                  | 0.02117  | 0.03417             |
| $b_{12}$ | -0.078                  | -0.11495 | 0.03695             |
| $a_2$    | -0.89                   | -0.98922 | 0.09922             |
| $b_{21}$ | 0.084                   | 0.16549  | 0.08149             |
| $b_{22}$ | -0.002                  | -0.01146 | 0.00946             |

Example 4 - Multi-trophic dynamics for wolves, moose, and fir trees, analyzed with 28DF, 24DF and 28DF-splines

|          | Mühlbauer <i>et al.</i> | Estimate | Absolute Difference |
|----------|-------------------------|----------|---------------------|
| $a_1$    | 0.01                    | -0.06509 | 0.07509             |
| $b_{11}$ | -0.003                  | 0.00164  | 0.00464             |
| $b_{12}$ | 0.00004                 | 0.00007  | 0.00003             |
| $b_{13}$ | 0                       | -0.13411 | 0.13411             |
| $a_2$    | 2.021                   | 0.20754  | 1.81346             |
| $b_{21}$ | -0.088                  | -0.00483 | 0.08317             |
| $b_{22}$ | 0                       | -0.00009 | 0.00009             |
| $b_{23}$ | 0.002                   | 0.06010  | 0.05810             |
| $a_3$    | 0.238                   | -0.08580 | 0.32380             |
| $b_{31}$ | 0                       | 0.00343  | 0.00343             |
| $b_{32}$ | -0.0002                 | -0.00020 | 0.00000             |
| $b_{33}$ | -0.139                  | 0.43352  | 0.57252             |

Example 5 - Predator-prey interactions between *E. sexmaculatus* and *T. occidentalis*, analyzed with 15DF and 20DF-splines

|          | Mühlbauer <i>et al.</i> | Estimate | Absolute Difference |
|----------|-------------------------|----------|---------------------|
| $a_1$    | 0.344                   | 0.03525  | 0.30875             |
| $b_{11}$ | 0                       | 0.00038  | 0.00038             |
| $b_{12}$ | -0.059                  | -0.03619 | 0.02281             |
| $a_2$    | -0.236                  | -0.44687 | 0.21087             |
| $b_{21}$ | 0.0005                  | 0.00159  | 0.00109             |
| $b_{22}$ | 0                       | -0.03540 | 0.03540             |

1092

1093 **Table S4.3 – MAR estimates for five experimental data sets from (Mühlbauer et al., 2020).** Data came  
 1094 from (Gause, 1934), (McLaren & Peterson, 1994) and (Huffaker et al., 1963) experiments. See R package  
 1095 *gauseR* (Mühlbauer et al., 2020) for datasets “*gause\_1934\_science\_f02\_03*”, “*gause\_1934\_book\_f32*”,  
 1096 “*mclaren\_1994\_f03*” and “*huffaker\_1963*” for details on observations. Parameter estimates from  
 1097 Mühlbauer *et al.* can also be found in Table 2 on their paper.

1098 Example 1 - *Paramecium caudatum* in monoculture.

|            | MAR       | MAR log transformation | MAR with data smoothing | MAR log transformation with smoothing |
|------------|-----------|------------------------|-------------------------|---------------------------------------|
| $\beta_1$  | 0.90000   | 0.85550                | 0.90400                 | 0.74718                               |
| $\alpha_1$ | 9.93000   | 0.15590                | 10.22600                | 0.21106                               |
| $\delta_1$ | 287.57000 | 0.06920                | 126.15300               | 0.00525                               |

1099

1100 Example 2 - *Paramecium caudatum* and *Paramecium aurelia* in coculture

|              | MAR       | MAR log transformation | MAR with data smoothing | MAR log transformation with smoothing |
|--------------|-----------|------------------------|-------------------------|---------------------------------------|
| $\beta_{11}$ | 0.81800   | 0.73590                | 0.91500                 | 0.98309                               |
| $\beta_{21}$ | 0.07170   | 0.03240                | 0.11600                 | 0.03625                               |
| $\beta_{12}$ | -0.16030  | -0.07020               | -0.16900                | -0.26372                              |
| $\beta_{22}$ | 0.82140   | 0.71450                | 0.87700                 | 0.73153                               |
| $\alpha_1$   | 27.54890  | 1.38260                | 0.91000                 | 0.07810                               |
| $\alpha_2$   | 20.30740  | 1.28150                | 5.82700                 | 0.15430                               |
| $\delta_1$   | 262.75870 | 0.17190                | 113.99000               | 0.03530                               |
| $\delta_2$   | 253.59620 | 0.03470                | 11.12100                | 0.00202                               |

1101

1102 Example 3 - Predator-prey interactions between *Didinium nasutum* and *Paramecium caudatum*

|              | MAR      | MAR log transformation | MAR with data smoothing | MAR log transformation with smoothing |
|--------------|----------|------------------------|-------------------------|---------------------------------------|
| $\beta_{11}$ | 0.52400  | 0.80250                | 0.37800                 | 0.86900                               |
| $\beta_{21}$ | 0.57700  | 0.10510                | 0.52100                 | 0.18700                               |
| $\beta_{12}$ | -0.57200 | -0.21950               | -0.45100                | -0.25400                              |
| $\beta_{22}$ | 0.63300  | 0.59490                | 0.69100                 | 0.76500                               |
| $\alpha_1$   | 12.93300 | -1.11100               | 0.40300                 | -0.75400                              |
| $\alpha_2$   | -2.76100 | 0.06450                | 0.23900                 | 0.70000                               |
| $\delta_1$   | 94.22700 | 10.97630               | 140.72600               | 7.15700                               |
| $\delta_2$   | 27.95400 | 23.00840               | 83.62600                | 9.82300                               |

1103

1104

1105

1106

1107 Example 4 - Multi-trophic dynamics for wolves, moose, and fir trees

|              | MAR         | MAR log transformation | MAR with data smoothing | MAR log transformation with smoothing |
|--------------|-------------|------------------------|-------------------------|---------------------------------------|
| $\beta_{11}$ | 0.62900     | 0.69390                | 1.13000                 | 1.17360                               |
| $\beta_{21}$ | -4.15000    | -0.04540               | -3.48000                | -0.04426                              |
| $\beta_{31}$ | -0.00083    | -0.02210               | 0.00137                 | 0.07236                               |
| $\beta_{12}$ | 0.00517     | 0.07570                | 0.00148                 | 0.01665                               |
| $\beta_{22}$ | 0.84800     | 0.86270                | 0.90300                 | 0.89080                               |
| $\beta_{32}$ | -0.00007    | -0.12840               | -0.00009                | -0.13234                              |
| $\beta_{13}$ | -27.30000   | -0.34650               | 10.70000                | 0.22128                               |
| $\beta_{23}$ | 96.60000    | 0.08020                | 245.00000               | 0.13054                               |
| $\beta_{33}$ | 0.89000     | 0.89160                | 1.11000                 | 1.06497                               |
| $\alpha_1$   | 15.90000    | 0.12600                | -0.35700                | -0.02613                              |
| $\alpha_2$   | 241.00000   | 1.18230                | 27.80000                | 0.02986                               |
| $\alpha_3$   | 0.14200     | 0.85670                | -0.00485                | -0.01065                              |
| $\delta_1$   | 32.30000    | 0.06210                | 3.88000                 | 0.00553                               |
| $\delta_2$   | 15000.00000 | 0.01080                | 1290.00000              | 0.00127                               |
| $\delta_3$   | 0.00382     | 0.02160                | 0.00098                 | 0.00591                               |

1108

1109 Example 5 - Predator-prey interactions between *E. sexmaculatus* and *T. occidentalis*

|              | MAR         | MAR log transformation | MAR with data smoothing | MAR log transformation with smoothing |
|--------------|-------------|------------------------|-------------------------|---------------------------------------|
| $\beta_{11}$ | 1.01500     | 0.88120                | 1.11000                 | 1.05163                               |
| $\beta_{21}$ | 0.00900     | 0.53850                | 0.00718                 | 0.47337                               |
| $\beta_{12}$ | -17.79700   | -0.09960               | -16.00000               | -0.10626                              |
| $\beta_{22}$ | 0.56200     | 0.75520                | 0.73200                 | 0.86330                               |
| $\alpha_1$   | 94.24600    | 0.80680                | 0.47700                 | -0.00088                              |
| $\alpha_2$   | -1.28500    | -2.86420               | -0.02580                | -0.01771                              |
| $\delta_1$   | 15440.27300 | 0.13470                | 1360.00000              | 0.02078                               |
| $\delta_2$   | 5.55100     | 0.33790                | 1.93000                 | 0.08104                               |

1110

1111

1112

1113

1114 **Table S5.1 – Synthetic MAR data**

MAR Results

| $t$ | $X_1$   | $X_2$   | $X_3$   | $X_4$   |
|-----|---------|---------|---------|---------|
| 1   | 5       | 10      | 15      | 20      |
| 2   | 5.62418 | 35.2103 | 21.4125 | 10.3696 |
| 3   | 13.077  | 68.6603 | 16.2175 | 6.98986 |
| 4   | 30.8946 | 57.2944 | 7.75681 | 8.13234 |
| 5   | 42.7475 | 27.4855 | 3.71568 | 13.9927 |
| 6   | 31.3421 | 13.2593 | 2.63367 | 24.3619 |
| 7   | 16.5916 | 9.92497 | 3.02139 | 31.2622 |
| 8   | 9.868   | 12.4469 | 4.56419 | 27.4996 |
| 9   | 8.72248 | 20.3998 | 6.5998  | 19.5587 |
| 10  | 11.2768 | 30.657  | 7.33895 | 14.4998 |
| 11  | 16.7965 | 33.724  | 6.20514 | 13.314  |
| 12  | 21.9882 | 27.4413 | 4.66674 | 15.2345 |
| 13  | 22.1248 | 19.9474 | 3.79027 | 19.1227 |
| 14  | 18.0405 | 16.0646 | 3.69825 | 22.5386 |
| 15  | 14.0932 | 15.9557 | 4.22409 | 22.9275 |
| 16  | 12.3388 | 18.7495 | 5.03802 | 20.5772 |
| 17  | 12.7869 | 22.8183 | 5.59201 | 17.8653 |
| 18  | 14.8002 | 25.3774 | 5.51118 | 16.4484 |
| 19  | 17.1129 | 24.6804 | 4.99159 | 16.6605 |
| 20  | 18.1251 | 21.9731 | 4.48974 | 18.0462 |
| 21  | 17.3171 | 19.5701 | 4.27918 | 19.6396 |
| 22  | 15.6847 | 18.6862 | 4.39198 | 20.3941 |
| 23  | 14.456  | 19.3693 | 4.70288 | 19.9587 |
| 24  | 14.1822 | 20.9554 | 4.99681 | 18.8896 |
| 25  | 14.7787 | 22.3651 | 5.08888 | 17.9987 |
| 26  | 15.7517 | 22.7146 | 4.95911 | 17.7463 |
| 27  | 16.4482 | 21.9861 | 4.74141 | 18.1246 |
| 28  | 16.4701 | 20.8982 | 4.58774 | 18.7896 |
| 29  | 15.9468 | 20.1878 | 4.56995 | 19.2878 |
| 30  | 15.3325 | 20.1628 | 4.6678  | 19.3417 |
| 31  | 15.0101 | 20.6857 | 4.80099 | 19.0122 |

1115

1116



1117 **Table S5.2 –Synthetic MAR data with added noise (noisy MAR)**

Noisy MAR data

| $t$ | $X_1$   | $X_2$    | $X_3$   | $X_4$   |
|-----|---------|----------|---------|---------|
| 1   | 0.7537  | 5.7537   | 10.7537 | 15.7537 |
| 2   | 3.6789  | 33.265   | 19.4672 | 8.42431 |
| 3   | 22.0484 | 77.6318  | 25.189  | 15.9613 |
| 4   | 27.8408 | 54.24056 | 4.70298 | 5.0785  |
| 5   | 44.2644 | 29.0024  | 5.23259 | 15.5096 |
| 6   | 27.0183 | 8.93558  | 0.005   | 20.0381 |
| 7   | 12.285  | 5.61827  | 0.005   | 26.9555 |
| 8   | 8.64674 | 11.2257  | 3.34294 | 26.2784 |
| 9   | 13.7228 | 25.4001  | 11.6001 | 24.559  |
| 10  | 9.55584 | 28.9361  | 5.61798 | 12.7788 |
| 11  | 19.8884 | 36.8159  | 9.29705 | 16.406  |
| 12  | 16.6399 | 22.093   | 0.005   | 9.88615 |
| 13  | 20.6563 | 18.479   | 2.32184 | 17.6543 |
| 14  | 15.1923 | 13.2165  | 0.85012 | 19.6905 |
| 15  | 12.7385 | 14.601   | 2.86941 | 21.5728 |
| 16  | 16.8878 | 23.2986  | 9.58707 | 25.1263 |
| 17  | 12.3928 | 22.4243  | 5.19791 | 17.4712 |
| 18  | 15.4333 | 26.0105  | 6.14431 | 17.0815 |
| 19  | 18.0468 | 25.6143  | 5.92554 | 17.5945 |
| 20  | 15.8709 | 19.7188  | 2.23545 | 15.7919 |
| 21  | 12.0743 | 14.3274  | 0.005   | 14.3969 |
| 22  | 14.4706 | 17.472   | 3.17787 | 19.18   |
| 23  | 14.9269 | 19.8403  | 5.17384 | 20.4297 |
| 24  | 17.9169 | 24.6901  | 8.73157 | 22.6243 |
| 25  | 13.8412 | 21.4276  | 4.15137 | 17.0612 |
| 26  | 14.6419 | 21.6048  | 3.8493  | 16.6365 |
| 27  | 22.3732 | 27.9111  | 10.6664 | 24.0496 |
| 28  | 13.6319 | 18.06    | 1.74954 | 15.9514 |
| 29  | 17.5022 | 21.7432  | 6.12531 | 20.8432 |
| 30  | 13.1904 | 18.0207  | 2.52572 | 17.1996 |
| 31  | 16.5325 | 22.2082  | 6.32346 | 20.5347 |

1118

1119

1120

1121 **Table S5.3 – Synthetic MAR data with added noise replicates (replicate MAR)**

Replicate MAR data

| $t$ | $X_1$   | $X_2$   | $X_3$   | $X_4$   |
|-----|---------|---------|---------|---------|
| 1   | 4.49781 | 10.2631 | 14.7632 | 23.5471 |
| 1   | 5.11697 | 10.6373 | 13.2546 | 22.8581 |
| 1   | 4.17474 | 9.28028 | 15.2697 | 20.3851 |
| 1   | 4.79837 | 11.4797 | 15.3701 | 19.8827 |
| 1   | 4.61115 | 11.0217 | 12.2586 | 29.2412 |
| 3   | 11.9312 | 79.1524 | 17.0672 | 8.07106 |
| 3   | 10.947  | 62.6395 | 13.8815 | 7.31271 |
| 3   | 10.049  | 72.0532 | 15.922  | 9.44662 |
| 3   | 12.7162 | 67.1334 | 13.9795 | 6.6798  |
| 3   | 13.5553 | 74.391  | 19.6732 | 8.34617 |
| 5   | 41.8787 | 35.199  | 2.3953  | 15.7358 |
| 5   | 38.2823 | 34.7539 | 3.4456  | 17.6842 |
| 5   | 43.1218 | 17.1583 | 3.38346 | 9.12718 |
| 5   | 44.2767 | 37.916  | 2.02733 | 16.7366 |
| 5   | 30.7883 | 37.517  | 4.74218 | 11.6452 |
| 7   | 15.7223 | 9.78831 | 2.79243 | 47.4058 |
| 7   | 17.0225 | 8.50962 | 3.40691 | 32.5233 |
| 7   | 16.3596 | 9.74137 | 3.29265 | 24.6074 |
| 7   | 12.7344 | 13.1973 | 1.77531 | 31.342  |
| 7   | 12.9829 | 10.462  | 3.63077 | 18.2921 |
| 9   | 10.287  | 20.1958 | 4.824   | 12.0043 |
| 9   | 9.96034 | 19.7555 | 6.8854  | 22.756  |
| 9   | 11.7355 | 19.9764 | 5.86442 | 25.1459 |
| 9   | 7.16472 | 15.6769 | 5.89983 | 29.1256 |
| 9   | 7.27019 | 22.0869 | 5.04399 | 14.9662 |
| 11  | 15.6781 | 42.9179 | 5.62292 | 15.5585 |
| 11  | 11.8986 | 31.024  | 5.24159 | 12.3307 |
| 11  | 20.9623 | 32.9993 | 6.41934 | 13.992  |
| 11  | 14.7321 | 24.0842 | 5.79439 | 13.6559 |
| 11  | 20.2166 | 32.0002 | 5.82968 | 17.615  |
| 13  | 18.7011 | 21.639  | 3.34761 | 20.71   |
| 13  | 15.2871 | 17.8779 | 3.57818 | 22.9758 |
| 13  | 20.047  | 21.1359 | 3.47356 | 15.8704 |
| 13  | 25.1738 | 18.1115 | 4.81227 | 20.8173 |
| 13  | 21.4569 | 21.7648 | 3.75984 | 20.8672 |
| 15  | 12.942  | 9.13784 | 4.35658 | 25.9541 |
| 15  | 11.3257 | 12.4019 | 3.85461 | 20.5608 |
| 15  | 15.2742 | 16.3838 | 5.09822 | 30.5096 |
| 15  | 14.0426 | 15.8784 | 4.43551 | 21.3816 |
| 15  | 13.7737 | 15.6401 | 4.4472  | 23.5648 |
| 18  | 14.0831 | 25.677  | 5.31579 | 19.0626 |
| 18  | 14.8202 | 22.1809 | 5.23288 | 14.1771 |
| 18  | 15.3997 | 29.6731 | 6.20788 | 17.111  |
| 18  | 14.5306 | 26.8466 | 5.45091 | 9.73135 |
| 18  | 15.861  | 23.4862 | 6.90916 | 23.5824 |
| 22  | 11.7957 | 20.8907 | 4.50092 | 18.258  |
| 22  | 17.6303 | 21.3329 | 4.31011 | 19.19   |
| 22  | 12.2785 | 16.3511 | 4.18731 | 19.371  |
| 22  | 18.677  | 17.6922 | 6.05678 | 18.6402 |
| 22  | 20.6271 | 19.2914 | 3.43852 | 22.7473 |
| 26  | 15.8405 | 21.0941 | 5.80476 | 19.5684 |
| 26  | 18.9594 | 18.0741 | 4.40203 | 14.1525 |
| 26  | 6.23512 | 24.2245 | 6.18947 | 20.1291 |
| 26  | 11.5617 | 18.8505 | 3.18491 | 22.1173 |
| 26  | 14.6982 | 18.3201 | 5.83128 | 16.8463 |
| 30  | 10.6779 | 20.0665 | 4.69269 | 19.9748 |
| 30  | 16.5898 | 17.6329 | 5.2624  | 14.6922 |
| 30  | 19.4617 | 17.7483 | 5.08063 | 21.715  |
| 30  | 14.4153 | 13.7083 | 4.35089 | 17.093  |
| 30  | 14.1355 | 23.5724 | 5.30704 | 20.2612 |

1122

1123 **Table S5.4 – Initial conditions and ALVI-MI parameters estimates for the synthetic MAR data**

|                 | Noise MAR              | Replicate MAR          |
|-----------------|------------------------|------------------------|
| Spline          | 15DF-spline            | 15DF-spline            |
| Point subsample | $t = 2, 6, 15, 18, 26$ | $t = 1, 3, 11, 13, 15$ |
|                 | Initial condition      | Initial condition      |
| $X_1$           | 0.814535               | 4.639806               |
| $X_2$           | 7.333485               | 10.536398              |
| $X_3$           | 12.89041               | 14.183246              |
| $X_4$           | 14.301336              | 23.182858              |
| Parameter       | Estimate               | Estimate               |
| $a_1$           | 51.4374203             | 1.986927               |
| $b_{11}$        | -0.7981952             | -0.029770              |
| $b_{12}$        | -0.1668495             | -0.008283              |
| $b_{13}$        | -1.2191651             | 0.012518               |
| $b_{14}$        | -1.5223832             | -0.068446              |
| $a_2$           | 34.0728264             | 2.071364               |
| $b_{21}$        | -0.5711864             | -0.054005              |
| $b_{22}$        | -0.1142499             | -0.025029              |
| $b_{23}$        | -0.8100883             | 0.065384               |
| $b_{24}$        | -0.9677829             | -0.051774              |
| $a_3$           | 103.292766             | 0.327628               |
| $b_{31}$        | -1.7809655             | -0.022297              |
| $b_{32}$        | -0.3029228             | -0.008557              |
| $b_{33}$        | -2.6887155             | -0.002260              |
| $b_{34}$        | -2.8840097             | 0.010410               |
| $a_4$           | 30.8332588             | -1.318063              |
| $b_{41}$        | -0.4422159             | 0.036978               |
| $b_{42}$        | -0.1141606             | 0.014019               |
| $b_{43}$        | -0.770332              | -0.029955              |
| $b_{44}$        | -0.9159577             | 0.029689               |

1124

1125

1126

1127 **Table S6.1 – Parameter values and initial conditions estimated for the ‘grey whales’ dataset (Gerber,**  
 1128 **Demaster, & Kareiva, 1999)**

Results generated with ALVI-MI with 3DF-spline and a data sample composed of spline values in 1959 and 1966.

| Parameter                                        | True value | Estimate  |
|--------------------------------------------------|------------|-----------|
| <b>ALVI-MI</b>                                   |            |           |
| $a_1$                                            |            | 0.0948    |
| $b_{11}$                                         |            | -3.79E-06 |
| $X_1(0)$                                         | 2894       | 3663.9550 |
| <b>MAR</b>                                       |            |           |
| $\alpha_1$                                       |            | 1260      |
| $\beta_{11}$                                     |            | 0.943     |
| $\delta_1$                                       |            | 7240000   |
| $X_1(0)$                                         | 2894       |           |
| <b>MAR with log transformation</b>               |            |           |
| $\alpha_1$                                       |            | 1.0368    |
| $\beta_{11}$                                     |            | 0.9512    |
| $\delta_1$                                       |            | 0.0327    |
| $X_1(0)$                                         | 2894       |           |
| <b>MAR with smoothing</b>                        |            |           |
| $\alpha_1$                                       |            | 597       |
| $\beta_{11}$                                     |            | 0.9930    |
| $\delta_1$                                       |            | 199000    |
| $X_1(0)$                                         | 2894       |           |
| <b>MAR with log transformation and smoothing</b> |            |           |
| $\alpha_1$                                       |            | 0.4902    |
| $\beta_{11}$                                     |            | 0.9535    |
| $\delta_1$                                       |            | 0.0014    |
| $X_1(0)$                                         | 2894       |           |

1129

1130

1131 **Table S6.2 – Parameters and initial conditions estimated for the ‘Wolves and Moose’ dataset**  
 1132 **(Vucetich, 2021)**

Results of ALVI-MI with 15DF-splines and a data sample composed of spline values in 1991, 1994 and 1997.

**ALVI-MI**

|           | Initial condition | Estimate |
|-----------|-------------------|----------|
| $X_1$     | 20                | 21.6545  |
| $X_2$     | 538               | 560.5340 |
| Parameter | Estimate          |          |
| $a_1$     | -0.2732           |          |
| $b_{11}$  | 0.0073            |          |
| $b_{12}$  | 0.0001            |          |
| $a_2$     | 0.8431            |          |
| $b_{21}$  | -0.0380           |          |
| $b_{22}$  | -0.0001           |          |

**MAR with log transformation**

|              | Initial condition | Estimate |
|--------------|-------------------|----------|
| $X_1$        | 20                | 22.0000  |
| $X_2$        | 538               | 564.0000 |
| Parameter    | Estimate          |          |
| $\beta_{11}$ | 0.7670            |          |
| $\beta_{21}$ | -0.1788           |          |
| $\beta_{12}$ | 0.0783            |          |
| $\beta_{22}$ | 0.8277            |          |
| $\delta_1$   | 0.4485            |          |
| $\delta_2$   | 0.1758            |          |

1133

1134

1135

## 1136 5. References

- 1137 Batista Júnior, A. B., & Pires, P. S. M. (2014). An Approach to Outlier Detection and Smoothing Applied to  
1138 a Trajectory Radar Data. *Journal of Aerospace Technology and Management*, 6(3), 237–248.  
1139 doi:10.5028/jatm.v6i3.325
- 1140 Burden, R. L., Faires, J. D., & Burden, A. M. (1993). *Numerical Analysis* (Fifth edit). Boston, MA: PWS  
1141 Publishing Co.
- 1142 Certain, G., Barraquand, F., & Gårdmark, A. (2018). How do MAR(1) models cope with hidden  
1143 nonlinearities in ecological dynamics? *Methods in Ecology and Evolution*, 9(9), 1975–1995.  
1144 doi:10.1111/2041-210X.13021
- 1145 Chiang, S.-Y. (2012). An application of Lotka–Volterra model to Taiwan’s transition from 200mm to  
1146 300mm silicon wafers. *Technological Forecasting and Social Change*, 79(2), 383–392.  
1147 doi:10.1016/j.techfore.2011.05.007
- 1148 Cleveland, W. S. (1979). Robust Locally Weighted Regression and Smoothing Scatterplots. *Journal of the*  
1149 *American Statistical Association*, 74(368), 829–836. doi:10.1080/01621459.1979.10481038
- 1150 Cleveland, W. S. (1981). LOWESS: A Program for Smoothing Scatterplots by Robust Locally Weighted  
1151 Regression. *The American Statistician*, 35(1), 54. doi:10.2307/2683591
- 1152 Cleveland, W. S., & Devlin, S. J. (1988). Locally Weighted Regression: An Approach to Regression Analysis  
1153 by Local Fitting. *Journal of the American Statistical Association*, 83(403), 596–610.  
1154 doi:10.1080/01621459.1988.10478639
- 1155 Cleveland, W. S., & Grosse, E. (1991). Computational methods for local regression. *Statistics and*  
1156 *Computing*, 1(1), 47–62. doi:10.1007/BF01890836
- 1157 Dam, P., Fonseca, L. L., Konstantinidis, K. T., & Voit, E. O. (2016). Dynamic models of the complex  
1158 microbial metapopulation of lake mendota. *Npj Systems Biology and Applications*, 2(1), 16007.  
1159 doi:10.1038/npjbsa.2016.7
- 1160 Dam, P., Rodriguez-R, L. M., Luo, C., Hatt, J., Tsementzi, D., Konstantinidis, K. T., & Voit, E. O. (2020).  
1161 Model-based comparisons of the abundance dynamics of dacterial communities in two lakes.  
1162 *Scientific Reports*, 10(1), 1–12. doi:10.1038/s41598-020-58769-y
- 1163 Eilers, P. H. C. (2003). A Perfect Smoother. *Analytical Chemistry*, 75(14), 3631–3636.  
1164 doi:10.1021/ac034173t
- 1165 Eilers, P. H. C., & Marx, B. D. (1996). Flexible smoothing with B -splines and penalties. *Statistical Science*,  
1166 11(2), 89–121. doi:10.1214/ss/1038425655
- 1167 Gandolfo, G. (2008). Giuseppe Palomba and the Lotka-Volterra equations. *RENDICONTI LINCEI*, 19(4),  
1168 347–357. doi:10.1007/s12210-008-0023-7
- 1169 Garcia, D. (2010). Robust smoothing of gridded data in one and higher dimensions with missing values.  
1170 *Computational Statistics & Data Analysis*, 54(4), 1167–1178. doi:10.1016/j.csda.2009.09.020
- 1171 Gause, G. F. (1934). Experimental Analysis of Vito Volterra’s mathematical theory of the struggle for

- 1172 existence. *Science*, 79(2036), 16–17. doi:10.1126/science.79.2036.16-a
- 1173 Gerber, L. R., Demaster, D. P., & Kareiva, P. M. (1999). Gray whales and the value of monitoring data in  
1174 implementing the U.S. endangered species act. *Conservation Biology*, 13(5), 1215–1219.  
1175 doi:10.1046/j.1523-1739.1999.98466.x
- 1176 Haas, C. N. (1981). Application of predator-prey models to disinfection. *Journal of the Water Pollution*  
1177 *Control Federation*, 53(3 I), 378–386. doi:10.2307/25041087
- 1178 Hacinliyan, A. S., Kusbeyzi, I., & Aybar, O. O. (2010). Approximate solutions of Maxwell Bloch equations  
1179 and possible Lotka Volterra type behavior. *Nonlinear Dynamics*, 62(1–2), 17–26.  
1180 doi:10.1007/s11071-010-9695-5
- 1181 Holmes, E. E., Ward, E. J., & Scheuerell, M. D. (2020). Analysis of multivariate timeseries using the  
1182 MARSS package, version 3.11.3.
- 1183 Holmes, E. E., Ward, E. J., & Wills, K. (2012). MARSS: multivariate autoregressive state-space models for  
1184 analyzing time-series data. *The R Journal*, 4(1), 11. doi:10.32614/RJ-2012-002
- 1185 Huffaker, C. B., Shea, K. B., & Herman, S. G. (1963). Experimental studies on predation: dispersion  
1186 factors and predator-prey oscillations. *Hilgardia*, 34, 305–330. Retrieved from  
1187 <http://hilgardia.ucanr.edu/fileaccess.cfm?article=152594&p=ZPTIMD>
- 1188 Hung, H.-C., Chiu, Y.-C., Huang, H.-C., & Wu, M.-C. (2017). An enhanced application of Lotka–Volterra  
1189 model to forecast the sales of two competing retail formats. *Computers & Industrial Engineering*,  
1190 109, 325–334. doi:10.1016/j.cie.2017.05.022
- 1191 Hytti, H., Takalo, R., & Ihalainen, H. (2006). Tutorial on Multivariate Autoregressive Modelling. *Journal of*  
1192 *Clinical Monitoring and Computing*, 20(2), 101–108. doi:10.1007/s10877-006-9013-4
- 1193 Ives, A. R. (1995). Predicting the response of populations to environmental change. *Ecology*, 76(3), 926–  
1194 941. doi:10.2307/1939357
- 1195 Knowles, I., & Renka, R. J. (2014). Methods for Numerical Differentiation of Noisy Data. *Electronic*  
1196 *Journal of Differential Equations*, 21, 235–246. Retrieved from [https://ejde.math.txstate.edu/conf-](https://ejde.math.txstate.edu/conf-proc/21/k3/knowles.pdf)  
1197 [proc/21/k3/knowles.pdf](https://ejde.math.txstate.edu/conf-proc/21/k3/knowles.pdf)
- 1198 Loader, C. (2012). Smoothing: Local Regression Techniques. In *Handbook of Computational Statistics* (pp.  
1199 571–596). Berlin, Heidelberg: Springer Berlin Heidelberg. doi:10.1007/978-3-642-21551-3\_20
- 1200 McLaren, B. E., & Peterson, R. O. (1994). Wolves, moose, and tree Rings on Isle Royale. *Science*,  
1201 266(5190), 1555–1558. doi:10.1126/science.266.5190.1555
- 1202 Mühlbauer, L. K., Schulze, M., Harpole, W. S., & Clark, A. T. (2020). gauseR: Simple methods for fitting  
1203 Lotka-Volterra models describing Gause’s “Struggle for Existence”. *Ecology and Evolution*, 10(23),  
1204 13275–13283. doi:10.1002/ece3.6926
- 1205 Nambu, M. (1986). Plasma-maser effects in plasma astrophysics. *Space Science Reviews*, 44(3–4), 357–  
1206 391. doi:10.1007/BF00200820
- 1207 Peschel, M., & Mende, W. (1986). *The Predator-Prey Model: Do we Live in a Volterra World?* Berlin:  
1208 Akademie-Verlag.

- 1209 Ramsay, J. O., Hooker, G., Campbell, D., & Cao, J. (2007). Parameter estimation for differential  
1210 equations: a generalized smoothing approach. *Journal of the Royal Statistical Society: Series B*  
1211 *(Statistical Methodology)*, 69(5), 741–796. doi:10.1111/j.1467-9868.2007.00610.x
- 1212 Savageau, M. A., & Voit, E. O. (1987). Recasting nonlinear differential equations as S-systems: a  
1213 canonical nonlinear form. *Mathematical Biosciences*, 87(1), 83–115. doi:10.1016/0025-  
1214 5564(87)90035-6
- 1215 Smyth, G. (2020). Difference between LOESS and LOWESS. Retrieved 3 September 2021, from  
1216 <https://stats.stackexchange.com/questions/161069/difference-between-loess-and-lowess>
- 1217 Stein, R. R., Bucci, V., Toussaint, N. C., Buffie, C. G., Räscht, G., Pamer, E. G., ... Xavier, J. B. (2013).  
1218 Ecological modeling from time-series inference: insight into dynamics and stability of intestinal  
1219 microbiota. *PLoS Computational Biology*, 9(12), e1003388. doi:10.1371/journal.pcbi.1003388
- 1220 Torres, N. V., & Voit, E. O. (2002). *Pathway Analysis and Optimization in Metabolic Engineering*.  
1221 Cambridge, U.K.: Cambridge University Press. doi:10.1017/CBO9780511546334
- 1222 Vano, J. A., Wildenberg, J. C., Anderson, M. B., Noel, J. K., & Sprott, J. C. (2006). Chaos in low-  
1223 dimensional Lotka–Volterra models of competition. *Nonlinearity*, 19(10), 2391–2404.  
1224 doi:10.1088/0951-7715/19/10/006
- 1225 Varah, J. M. (1982). A spline least squares method for numerical parameter estimation in differential  
1226 equations. *SIAM Journal on Scientific and Statistical Computing*, 3(1), 28–46. doi:10.1137/0903003
- 1227 Vilela, M., Borges, C. C. H., Vinga, S., Vasconcelos, A. T. R., Santos, H., Voit, E. O., & Almeida, J. S. (2007).  
1228 Automated smoother for the numerical decoupling of dynamics models. *BMC Bioinformatics*, 8(1),  
1229 305. doi:10.1186/1471-2105-8-305
- 1230 Voit, E. O. (2000). Canonical Modeling: Review of Concepts with Emphasis on Environmental Health.  
1231 *Environmental Health Perspectives*, 108(s5), 895–909. doi:10.1289/ehp.00108s5895
- 1232 Voit, E. O. (2013). Biochemical systems theory: a review. *ISRN Biomathematics*, 2013, 1–53.  
1233 doi:10.1155/2013/897658
- 1234 Voit, E. O. (2017). *A First Course in Systems Biology* (Second edi). Garland Science.  
1235 doi:10.1201/9780203702260
- 1236 Voit, E. O., & Almeida, J. (2003). Dynamic Profiling and Canonical Modeling. In *Metabolic Profiling: Its*  
1237 *Role in Biomarker Discovery and Gene Function Analysis* (pp. 257–276). Boston, MA: Springer US.  
1238 doi:10.1007/978-1-4615-0333-0\_14
- 1239 Voit, E. O., & Almeida, J. (2004). Decoupling dynamical systems for pathway identification from  
1240 metabolic profiles. *Bioinformatics*, 20(11), 1670–1681. doi:10.1093/bioinformatics/bth140
- 1241 Voit, E. O., & Chou, I.-C. (2010). Parameter estimation in canonical biological systems models.  
1242 *International Journal of Systems and Synthetic Biology*, 1(June), 1–19.
- 1243 Voit, E. O., Davis, J. D., & Olivença, D. V. (2021). Inference and validation of the structure of Lotka-  
1244 Volterra models. *BioRxiv*. doi:10.1101/2021.08.14.456346
- 1245 Voit, E. O., Marino, S., & Lall, R. (2005). Challenges for the Identification of Biological Systems from in  
1246 vivo Time Series Data, 5(December 2004), 83–92.



- 1247 Voit, E. O., & Savageau, M. A. (1982a). Power-law approach to modeling biological systems; II.  
1248 Application to ethanol production. *J. Ferment. Technol.*, 60(3), 229–232.
- 1249 Voit, E. O., & Savageau, M. A. (1982b). Power-law approach to modeling biological systems; III. Methods  
1250 of analysis. *J. Ferment. Technol.*, 60(3), 233–241.
- 1251 Voit, E. O., & Savageau, M. A. (1986). Equivalence between S-systems and Volterra systems.  
1252 *Mathematical Biosciences*, 78(1), 47–55. doi:10.1016/0025-5564(86)90030-1
- 1253 Vucetich, J. A. (2021). Wolves and moose of Isle Royale. Retrieved from <https://isleroyalewolf.org/>
- 1254 Zhou, Y., & Chen, B. (2006). Analysis of multi-ISPs game based on lotka-volterra model. In *CIMCA 2006:  
1255 International Conference on Computational Intelligence for Modelling, Control and Automation,  
1256 Jointly with IAWTIC 2006: International Conference on Intelligent Agents Web Technologies ... IEEE  
1257 Computer Society*. doi:10.1109/CIMCA.2006.44
- 1258
- 1259
